1 **Virus-Receptor Interactions of Glycosylated SARS-CoV-2 Spike and Human ACE2**  
2 **Receptor**

3  
4 Peng Zhao<sup>1,#</sup>, Jeremy L. Praissman<sup>1,#</sup>, Oliver C. Grant<sup>1,#</sup>, Yongfei Cai<sup>2</sup>, Tianshu Xiao<sup>2</sup>, Katelyn E.  
5 Rosenbalm<sup>1</sup>, Kazuhiro Aoki<sup>1</sup>, Benjamin P. Kellman<sup>3</sup>, Robert Bridger<sup>1</sup>, Dan H. Barouch<sup>4</sup>, Melinda  
6 A. Brindley<sup>5</sup>, Nathan E. Lewis<sup>3,6</sup>, Michael Tiemeyer<sup>1</sup>, Bing Chen<sup>2</sup>, Robert J. Woods<sup>1</sup>, and Lance  
7 Wells<sup>1\*</sup>

8  
9 <sup>1</sup> Complex Carbohydrate Research Center, Department of Biochemistry and Molecular  
10 Biology, and Department of Chemistry, University of Georgia, Athens, Georgia, 30602, USA

11 <sup>2</sup> Division of Molecular Medicine, Children's Hospital and Department of Pediatrics, Harvard  
12 Medical School, Boston, Massachusetts, 02115, USA

13 <sup>3</sup> Departments of Pediatrics and Bioengineering, University of California, San Diego, La Jolla,  
14 California, 92093, USA

15 <sup>4</sup> Center for Virology and Vaccine Research, Beth Israel Deaconess Medical Center, Harvard  
16 Medical School, Boston, Massachusetts, 02215, USA

17 <sup>5</sup> Department of Infectious Diseases, Department of Population Health, Center for Vaccines and  
18 Immunology, College of Veterinary Medicine, University of Georgia, Athens, GA 30602, USA

19 <sup>6</sup> Novo Nordisk Foundation Center for Biosustainability at UC San Diego, La Jolla, California,  
20 92093, USA

21  
22 # Authors contributed equally

23  
24 \* To whom correspondence should be addressed: Lance Wells, [lwells@ccrc.uga.edu](mailto:lwells@ccrc.uga.edu)

25  
26

27 **SUMMARY**

28 The current COVID-19 pandemic is caused by the SARS-CoV-2 betacoronavirus, which utilizes  
29 its highly glycosylated trimeric Spike protein to bind to the cell surface receptor ACE2 glycoprotein  
30 and facilitate host cell entry. We utilized glycomics-informed glycoproteomics to characterize site-  
31 specific microheterogeneity of glycosylation for a recombinant trimer spike mimetic immunogen  
32 and for a soluble version of human ACE2. We combined this information with bioinformatic  
33 analyses of natural variants and with existing 3D-structures of both glycoproteins to generate  
34 molecular dynamic simulations of each glycoprotein alone and interacting with one another. Our  
35 results highlight roles for glycans in sterically masking polypeptide epitopes and directly  
36 modulating Spike-ACE2 interactions. Furthermore, our results illustrate the impact of viral  
37 evolution and divergence on Spike glycosylation, as well as the influence of natural variants on  
38 ACE2 receptor glycosylation that, taken together, can facilitate immunogen design to achieve  
39 antibody neutralization and inform therapeutic strategies to inhibit viral infection.

40

41 **Keywords:** SARS-CoV-2, COVID-19, spike protein, coronavirus, ACE2, glycoprotein,  
42 glycosylation, mass spectrometry, molecular dynamics, 3D-modeling

43

44

45

46

47

48

49

50

51

52

53

54

## 55 INTRODUCTION

56 The SARS-CoV-2 coronavirus, a positive-sense single-stranded RNA virus, is responsible for the  
57 severe acute respiratory syndrome referred to as COVID-19 that was first reported in China in  
58 December of 2019 (1). In approximately six months, this betacoronavirus has spread globally  
59 with more than 8 million people testing positive worldwide resulting in greater than 470,000 deaths  
60 as of June 22<sup>nd</sup>, 2020 (<https://coronavirus.jhu.edu/map.html>). The SARS-CoV-2 coronavirus is  
61 highly similar (nearly 80% identical at the genomic level) to SARS-CoV-1, which was responsible  
62 for the severe acute respiratory syndrome outbreak that began in 2002 (2,3). Furthermore, human  
63 SARS-CoV-2 at the whole genome level is >95% identical to a bat coronavirus (RaTG13), the  
64 natural reservoir host for multiple coronaviruses (1,4,5). Given the rapid appearance and spread  
65 of this virus, there is no current validated vaccine or SARS-CoV-2-specific targeting therapy  
66 clinically approved although statins, heparin, and steroids look promising for lowering fatality rates  
67 and antivirals likely reduce the duration of symptomatic disease presentation (6-12).

68 SARS-CoV-2, like SARS-CoV-1, utilizes the host angiotensin converting enzyme II (ACE2) for  
69 binding and entry into host cells (13,14). Like many viruses, SARS-CoV-2 utilizes a spike  
70 glycoprotein trimer for recognition and binding to the host cell entry receptor and for membrane  
71 fusion (15). Given the importance of viral spike proteins for targeting and entry into host cells  
72 along with their location on the viral surface, spike proteins are often used as immunogens for  
73 vaccines to generate neutralizing antibodies and frequently targeted for inhibition by small  
74 molecules that might block host receptor binding and/or membrane fusion (15,16). In similar  
75 fashion, wildtype or catalytically-impaired ACE2 has also been investigated as a potential  
76 therapeutic biologic that might interfere with the infection cycle of coronaviruses (17,18). Thus, a  
77 detailed understanding of SARS-CoV-2 Spike binding to ACE2 is critical for elucidating  
78 mechanisms of viral binding and entry, as well as for undertaking the rational design of effective  
79 therapeutics.

80 The SARS-CoV-2 Spike glycoprotein consists of two subunits, a receptor binding subunit (S1)  
81 and a membrane fusion subunit (S2) (1,2). The Spike glycoprotein assembles into stable

82 homotrimers that together possess 66 canonical sequons for N-linked glycosylation (N-X-S/T,  
83 where X is any amino acid except P) as well as a number of potential O-linked glycosylation sites  
84 (19,20). Interestingly, coronaviruses virions bud into the lumen of the endoplasmic reticulum-  
85 Golgi intermediate compartment, ERGIC, raising unanswered questions regarding the precise  
86 mechanisms by which viral surface glycoproteins are processed as they traverse the secretory  
87 pathway (21,22). Nonetheless, it has been proposed that the virus acquires a glycan coat  
88 sufficient and similar enough to endogenous host protein glycosylation that it serves as a glycan  
89 shield, facilitating immune evasion by masking non-self viral peptides with self-glycans (15,20-  
90 22). In parallel to their potential masking functions, glycan-dependent epitopes can elicit specific,  
91 even neutralizing, antibody responses, as has been described for HIV-1 (15,23-26). Thus,  
92 understanding the glycosylation of the viral spike trimer is fundamental for the development of  
93 efficacious vaccines, neutralizing antibodies, and therapeutic inhibitors of infection.

94 ACE2 is an integral membrane metalloproteinase that regulates the renin-angiotensin system  
95 (27). Both SARS-CoV-1 and SARS-CoV-2 have co-opted ACE2 to function as the receptor by  
96 which these viruses attach and fuse with host cells (13,14). ACE2 is cleavable by ADAM  
97 proteases at the cell surface (28), resulting in the shedding of a soluble ectodomain which can be  
98 detected in apical secretions of various epithelial layers (gastric, airway, etc.) and in serum (29).

99 The N-terminal extracellular domain of ACE2 contains 6 canonical sequons for N-linked  
100 glycosylation and several potential O-linked sites. Several nonsynonymous single-nucleotide  
101 polymorphisms (SNPs) in the ACE2 gene have been identified in the human population and could  
102 potentially alter ACE2 glycosylation and/or affinity of the receptor for the viral spike protein (30).

103 Given that glycosylation can affect the half-life of circulating glycoproteins in addition to  
104 modulating the affinity of their interactions with receptors and immune/inflammatory signaling  
105 pathways (31,32), understanding the impact of glycosylation of ACE2 with respect to its binding  
106 of SARS-CoV-2 spike glycoprotein is of high importance. The proposed use of soluble  
107 extracellular domains of ACE2 as decoy, competitive inhibitors for SARS-CoV-2 infection

108 emphasizes the critical need for understanding the glycosylation profile of ACE2 so that optimally  
109 active biologics can be produced (17,18).

110 To accomplish the task of characterizing site-specific glycosylation of the trimer Spike of SARS-  
111 CoV-2 and the host receptor ACE2, we began by expressing and purifying a stabilized, soluble  
112 trimer Spike glycoprotein mimetic immunogen (S, (33)) and a soluble version of the ACE2  
113 glycoprotein from a human cell line. We utilized multiple mass spectrometry-based approaches,  
114 including glycomic and glycoproteomic approaches, to determine occupancy and site-specific  
115 heterogeneity of N-linked glycans. We also identified sites of O-linked glycosylation and the  
116 heterogeneity of the O-linked glycans on S and ACE2. We leveraged this rich dataset, along with  
117 existing 3D-structures of both glycoproteins, to generate static and molecular dynamic models of  
118 S alone, and in complex with the glycosylated, soluble ACE 2 receptor. By combining  
119 bioinformatic characterization of viral evolution and variants of the Spike and ACE2 with molecular  
120 dynamic simulations of the glycosylated S-ACE2 interaction, we identified important roles for  
121 glycans in multiple processes, including receptor-viral binding and glycan-shielding of the Spike.  
122 Our rich characterization of the recombinant, glycosylated spike trimer mimetic immunogen of  
123 SARS-CoV-2 in complex with the soluble human ACE2 receptor provides a detailed platform for  
124 guiding rational vaccine, antibody, and inhibitor design.

## 125 126 **RESULTS**

### 127 *Expression, Purification, and Characterization of SARS-CoV-2 Spike Glycoprotein Trimer and* 128 *Soluble Human ACE2*

129 A trimer-stabilized, soluble variant of the SARS-CoV-2 S protein (S) that contains 22 canonical  
130 N-linked glycosylation sequons and a soluble version of human ACE2 that contains 6 canonical  
131 N-linked glycosylation sequons (**Fig. 1A**) were purified from the media of transfected HEK293  
132 cells and the quaternary structure confirmed by negative EM staining for the S trimer (**Fig. 1B**)  
133 and purity examined by SDS-PAGE Coomassie G-250 stained gels for both (**Fig. 1C**). In addition,  
134 proteolytic digestions followed by proteomic analyses confirmed that the proteins were highly

135 purified (data not shown). Finally, the N-terminus of both the mature S and the soluble mature  
136 ACE2 were empirically determined via proteolytic digestions and LC-MS/MS analyses. These  
137 results confirmed that both the secreted, mature forms of S protein and ACE2 begin with an N-  
138 terminal glutamine that has undergone condensation to form pyroglutamine at residue 14 and 18,  
139 respectively (**Figs. 1D and S1**). The N-terminal peptide observed for S also contains a glycan at  
140 Asn-0017 (**Fig. 1D**) and mass spectrometry analysis of non-reducing proteolytic digestions  
141 confirmed that Cys-0015 of S is in a disulfide linkage with Cys-0136 (**Fig. S2, Supplemental**  
142 **Table, Tab 2**). Given that SignalP (34) predicts signal sequence cleavage between Cys-0015 and  
143 Val-0016 but we observed cleavage between Ser-0013 and Gln-0014, we examined the  
144 possibility that an in-frame upstream Methionine to the proposed start Methionine might be used  
145 to initiate translation (**Fig. S3**). If one examines the predicted signal sequence cleavage using the  
146 in-frame Met that is encoded 9 amino acids upstream, SignalP now predicts cleavage between  
147 the Ser and Gln that we observed in our studies (**Fig. S3**). To examine whether this impacted S  
148 expression, we expressed constructs that contained or did not contain the upstream 27  
149 nucleotides in a pseudovirus (VSV) system expressing SARS-CoV2 S (**Fig. S4**) and in our  
150 HEK293 system (data not shown). Both expression systems produced a similar amount of S  
151 regardless of which expression construct was utilized (**Fig. S4**). Thus, while the translation  
152 initiation start site has still not been fully defined, allowing for earlier translation in expression  
153 construct design did not have a significant impact on the generation of S.

#### 154 *Glycomics Informed Glycoproteomics Reveals Site-Specific Microheterogeneity of SARS-CoV-2* 155 *S Glycosylation*

156 We utilized multiple approaches to examine glycosylation of the SARS-CoV-2 S trimer. First, the  
157 portfolio of glycans linked to SARS-CoV-2 S trimer immunogen was analyzed following their  
158 release from the polypeptide backbone. N-glycans were released from protein by treatment with  
159 PNGase F and O-glycans were subsequently released by beta-elimination. Following  
160 permethylation to enhance detection sensitivity and structural characterization, released glycans  
161 were analyzed by multi-stage mass spectrometry (MS<sup>n</sup>) (35,36). Mass spectra were processed

162 by GRITS Toolbox and the resulting annotations were validated manually (37). Glycan  
163 assignments were grouped by type and by additional structural features for relative quantification  
164 of profile characteristics (**Fig. 2A, Supplemental Table, Tab 3**). This analysis quantified 49 N-  
165 glycans and revealed that 55% were of the complex type, 17% were of the hybrid type, and 28%  
166 were high-mannose. Among the complex and hybrid N-glycans, we observed a high degree of  
167 core fucosylation and significant abundance of bisected and LacDiNAc structures. We also  
168 detected 15 O-glycans released from the S trimer (**Fig. S5, Supplemental Table, Tab 4**).

169 To determine occupancy of N-linked glycans at each site, we employed a sequential  
170 deglycosylation approach using Endoglycosidase H and PNGase F in the presence of  $^{18}\text{O}\text{-H}_2\text{O}$   
171 following tryptic digestion of S (26,38). Following LC-MS/MS analyses, the resulting data  
172 confirmed that 19 of the canonical sequons had occupancies greater than 95% (**Supplemental**  
173 **Table, Tab 5**). One canonical sequence, N0149, had insufficient spectral counts for quantification  
174 by this method but subsequent analyses described below suggested high occupancy. The 2 most  
175 C-terminal N-linked sites, N1173 and N1194, had reduced occupancy, 52% and 82% respectively.  
176 Reduced occupancy at these sites may reflect hindered en-bloc transfer by the  
177 oligosaccharyltransferase (OST) due to primary amino acid sequences at or near the N-linked  
178 sequon. Alternatively, this may reflect these two sites being post-translationally modified after  
179 release of the protein by the ribosome by a less efficient STT3B-containing OST, either due to  
180 activity or initial folding of the polypeptide, as opposed to co-translationally modified by the  
181 STT3A-containing OST (39). None of the non-canonical sequons (3 N-X-C sites and 4 N-G-L/I/V  
182 sites, (40)) showed significant occupancy (>5%) except for N0501 that showed moderate (19%)  
183 conversion to  $^{18}\text{O}\text{-Asp}$  that could be due to deamidation that is facilitated by glycine at the +1  
184 position (**Supplemental Table, Tab 5, (41)**). Further analysis of this site (see below) by direct  
185 glycopeptide analyses allowed us to determine that N0501 undergoes deamidation but is not  
186 glycosylated. Thus, all, and only the, 22 canonical sequences for N-linked glycosylation (N-X-S/T)  
187 are utilized with only N1173 and N1194 demonstrating occupancies below 95%.

188 Next, we applied 3 different proteolytic digestion strategies to the SARS-CoV-2 S immunogen to  
189 maximize glycopeptide coverage by subsequent LC-MS/MS analyses. Extended gradient  
190 nanoflow reverse-phase LC-MS/MS was carried out on a ThermoFisher Lumos™ Tribid™  
191 instrument using Step-HCD fragmentation on each of the samples (see STAR methods for details,  
192 (23,24,26,38,42)). Following data analyses using pGlyco 2.2.2 (43), Byonic (44), and manual  
193 validation of glycan compositions against our released glycomics findings (**Fig. 2A**,  
194 **Supplemental Table, Tab 3**), we were able to determine the microheterogeneity at each of the  
195 22 canonical sites (**Fig. 2B-2E, S6, Supplemental Table, Tab 6**). Notably, none of the non-  
196 canonical consensus sequences, including N0501, displayed any quantifiable glycans. The N-  
197 glycosites N0074 (**Fig. 2B**) and N0149 (**Fig. 2C**) are highly processed and display a typical  
198 mammalian N-glycan profile. N0149 is, however, modified with several hybrid N-glycan structures  
199 while N0074 is not. N0234 (**Fig. 2D**) and N0801 (**Fig. 2E**) have N-glycan profiles more similar to  
200 those found on other viruses such as HIV (15) that are dominated by high-mannose structures.  
201 N0234 (**Fig. 2D**) displays an abundance of Man7 - Man9 high-mannose structures suggesting  
202 stalled processing by early acting ER and cis-Golgi mannosidases. In contrast, N0801 (**Fig. 2E**)  
203 is processed more efficiently to Man5 high-mannose and hybrid structures suggesting that access  
204 to the glycan at this site by MGAT1 and  $\alpha$ -Mannosidase II is hindered. In general, for all 22 sites  
205 (**Fig. 2B-2E, S6, Supplemental Table, Tab 6**), we observed under processing of complex glycan  
206 antennae (i.e. under-galactosylation and under-sialylation) and a high degree of core fucosylation  
207 in agreement with released glycan analyses (**Fig. 2A, Supplemental Table, Tab 3**). Based on  
208 the assignments and the spectral counts for each topology, we were able to determine the percent  
209 of total N-linked glycan types (high-mannose, hybrid, or complex) present at each site (**Figure 3**,  
210 **Supplemental Table, Tab 7**). Notably, 3 of the sites (N0234, N0709, and N0717) displayed more  
211 than 50% high-mannose glycans while 11 other sites (N0017, N0074, N0149, N0165, N0282,  
212 N0331, N0657, N1134, N1158, N1173, and N1194) were more than 90% complex when  
213 occupied. The other 8 sites were distributed between these 2 extremes. Notably, only 1 site  
214 (N0717 at 45%), which also had greater than 50% high-mannose (55%), had greater than 33%



215 hybrid structures. To further evaluate the heterogeneity, we grouped all the topologies into the 20  
216 classes recently described by the Crispin laboratory and referred to here as the Oxford  
217 classification (**Fig. S7, Supplemental Table, Tab 8**, (19)). Among other features observed, this  
218 classification allowed us to observe that while most sites with high mannose structures were  
219 dominated by the Man5GlcNAc2 structure, N0234 and N0717 were dominated by the higher Man  
220 structures of Man8GlcNAc2 and Man7GlcNAc2, respectively (**Fig. S7, Supplemental Table, Tab**  
221 **8**). Limited processing at N0234 is in agreement with a recent report suggesting that high  
222 mannose structures at this site help to stabilize the receptor-binding domain of S  
223 ([www.biorxiv.org/content/10.1101/2020.06.11.146522v1](http://www.biorxiv.org/content/10.1101/2020.06.11.146522v1)). Furthermore, applying the Oxford  
224 classifications to our dataset clearly demonstrates that the 3 most C-terminal sites (N1158,  
225 N1173, and N1194), dominated by complex type glycans, were more often further processed (i.e.  
226 multiple antennae) and elaborated (i.e. galactosylation and sialylation) than other sites (**Fig. S7,**  
227 **Supplemental Table, Tab 8**).

228 We also analyzed our generated mass spectrometry data for the presence of O-linked glycans  
229 based on our glycomic findings (**Fig. S5, Supplemental Table, Tab 4**) and a recent manuscript  
230 suggesting significant levels of O-glycosylation of S1 and S2 when expressed independently (45).  
231 We were able to confirm sites of O-glycan modification with microheterogeneity observed for the  
232 vast majority of these sites (**Supplemental Table, Tab 9**). However, occupancy at each site,  
233 determined by spectral counts, was observed to be very low (below 4%) except for Thr0323 that  
234 had a modest 11% occupancy (**Fig. S8, Supplemental Table, Tab 10**).

### 235 *3D Structural Modeling of Glycosylated SARS-CoV-2 Trimer Immunogen Enables Predictions of* 236 *Epitope Accessibility and Other Key Features*

237 A 3D structure of the S trimer was generated using a homology model of the S trimer described  
238 previously (based on PDB code 6VSB, (46)). Onto this 3D structure, we installed specific glycans  
239 at each glycosylated sequon based on three separate sets of criteria, thereby generating three  
240 different glycoform models for comparison (**Supplemental Table, Tab 1**). We denote the first of  
241 these criteria sets as “Abundance,” under which the most abundant glycan structure detected by

242 glycomics, that matched the most abundant glycan composition detected by glycoproteomics at  
243 each individual site, was selected for modeling. The second set of criteria, which we refer to as  
244 “Oxford Class” (**Fig. S7, Supplemental Table, Tabs 1,8**), assigned to individual sites the most  
245 abundant glycan structure detected by glycomics, that was consistent with the most highly  
246 represented Oxford classification group detected at each site by glycoproteomics. The third set  
247 of criteria was designated as “Processed” and assigned the most highly trimmed, elaborated, or  
248 terminally decorated structure detected by glycomics, that was present at  $\geq 1/3^{\text{rd}}$  of the abundance  
249 of the most highly abundant composition detected by glycoproteomics at each site  
250 (**Supplemental Table, Tab 1**). The glycoforms assembled by these three criteria were then  
251 subjected to multiple all atom MD simulations with explicit water. Information from analyses of  
252 these structures is presented in **Figure 4A** along with the sequence of the SARS-CoV-2 S  
253 protomer. We also determined variants in S that are emerging in the virus that have been  
254 sequenced to date (**Supplemental Table, Tab 11**). The inter-residue distances were measured  
255 between the most  $\alpha$ -carbon-distal atoms of the N-glycan sites and Spike glycoprotein population  
256 variant sites in 3D space (**Figure 4B**). Notable from this analysis, there are several variants that  
257 don’t ablate the N-linked sequon, but that are sufficiently close in 3-dimensional space to N-  
258 glycosites, such as D138H, H655Y, S939F, and L1203F, to warrant further investigation.  
259 The percentage of simulation time that each S protein residue is accessible to a probe that  
260 approximates the size of an antibody variable domain was calculated for a model of the S trimer  
261 using the Abundance glycoforms (**Supplemental Table, Tab 1, (47)**). The predicted antibody  
262 accessibility is visualized across the sequence, as well as mapped onto the 3D surface, via color  
263 shading (**Figure 4A, 4C, Supplemental Movie A**). Additionally, the Oxford class glycoforms  
264 (**Supplemental Table, Tab 1**), which is arguably the most representative means for showing  
265 glycan microheterogeneity using a single glycan structure (**Supplemental Table, Tab 8**), model  
266 is shown with the sequence variant information (Figure 4D, **Supplemental Table, Tab 11**). A  
267 substantial number of these variants occur (directly by comparison to **Figure 4A** or visually by  
268 comparison to **Figure 4C**) in regions of high calculated epitope accessibility (e.g. N74K, T76I,

269 R78M, D138H, H146Y, S151I, D253G, V483A, etc.) suggesting potential selective pressure to  
270 avoid host immune response. Also, it is interesting to note that 3 of the emerging variants would  
271 eliminate N-linked sequons in S; N74K and T76I would eliminate N-glycosylation of N74 (found in  
272 the insert variable region 1 of CoV-2 S compared to CoV-1 S), and S151I eliminates N-  
273 glycosylation of N149 (found in the insert variable region 2) (**Fig. 4A, S9, Supplemental Table,**  
274 **Tab 11**). Lastly, the SARS-CoV-2 S Processed glycoform model is shown (**Supplemental Table,**  
275 **Tab 1**), along with marking amino acid T0323 that has a modest (11% occupancy, **Fig. S8,**  
276 **Supplemental Table, Tab 10**) amount of O-glycosylation to represent the most heavily  
277 glycosylated form of S (**Figure 4E**).

### 278 *Glycomics Informed Glycoproteomics Reveals Complex N-linked Glycosylation of ACE2*

279 We also analyzed ACE2 glycosylation utilizing the same glycomic and glycoproteomic  
280 approaches described for S protein. Glycomic analyses of released N-linked glycans (**Fig. 5A,**  
281 **Supplemental Table, Tab 3**) revealed that the majority of glycans on ACE2 are complex with  
282 limited high-mannose and hybrid glycans. Glycoproteomic analyses revealed that occupancy  
283 was high (>75%) at all 6 sites and significant microheterogeneity dominated by complex N-  
284 glycans was observed for each site (**Fig. 5B-5G, S10, Supplemental Table, Tabs 5-8**). We also  
285 observed, consistent with the O-glycomics (**Fig. S5, Supplemental Table, Tab 4**), that Ser 155  
286 and several S/T residues at the C-terminus of ACE2 outside of the peptidase domain were O-  
287 glycosylated but stoichiometry was extremely low (less than 2%, **Supplemental Table, Tab 9**  
288 **and 10**).

### 289 *3D Structural Modeling of Glycosylated, Soluble, ACE2 Highlighting Glycosylation and Variants.*

290 We integrated our glycomics, glycoproteomics, and population variant analyses results with a 3D  
291 model of Ace 2 (based on PDB code 6M0J (48), see methods for details) to generate two versions  
292 of the soluble glycosylated ACE2 for visualization and molecular dynamics simulations.  
293 Information from these analyses is laid out first in **Figure 6A** along the primary structure  
294 (sequence) of the SARS-CoV-2 S protomer for reference. We visualized the ACE2 glycoprotein  
295 with the Abundance glycoform model simulated at each site as well as highlighting the naturally

296 occurring variants observed in the human population (**Fig. 6B, Supplemental Movie B,**  
297 **Supplemental Table, Tab 11**). Note, that the Abundance glycoform model and the Oxford class  
298 glycoform model for ACE2 are identical (**Supplemental Table, Tabs 1,8**). Notably, one site of  
299 N-linked glycosylation (N546) is predicted to not be present in 3 out of 10,000 humans based on  
300 naturally occurring variation in the human population (**Supplemental Table, Tab 11**). We also  
301 modeled ACE2 using the Processed glycoform model (**Fig. 6C**). In both models, the interaction  
302 domain with S is defined (**Fig. 6B-6C, Supplemental Movie B**).

303 *Molecular Dynamics Simulation of the Glycosylated Trimer Spike of SARS-CoV-2 in Complex*  
304 *with Glycosylated, Soluble, Human Ace 2 Reveals Protein and Glycan Interactions*

305 Molecular dynamics simulations were performed to examine the co-complex (generated from a  
306 crystal structure of the ACE2-RBD co-complex, PDB code 6M0J, (48)) of glycosylated S with  
307 glycosylated ACE2 with the 3 different glycoforms models (Abundance, Oxford Class, and  
308 Processed, **Supplemental Table, Tab 1, Supplemental Simulations 1-3**). Information from  
309 these analyses is laid out along the primary structure (sequence) of the SARS-CoV-2 S protomer  
310 and ACE2 highlighting regions of glycan-protein interaction observed in the MD simulation (**Fig.**  
311 **7A-B, Supplemental Simulations 1-3**). Interestingly, two glycans on Ace 2 (at N090 and N322),  
312 that are highlighted in **Figure 7B** and shown in a more close-up view in **Figure 7C**, are predicted  
313 to form interactions with the S protein. The N322 glycan interaction with the S trimer is outside of  
314 the receptor binding domain, and the interaction is observed across multiple simulations and  
315 throughout each simulation (**Fig. 7A, Supplemental Simulations 1-3**). The ACE2 glycan at N090  
316 is close enough to the S trimer surface to repeatedly form interactions, however the glycan arms  
317 interact with multiple regions of the surface over the course of the simulations, reflecting the  
318 relatively high degree of glycan dynamics (**Fig. 7C-E, Supplemental Movie C**). Inter-molecule  
319 glycan-glycan interactions are also observed repeatedly between the glycan at N546 of ACE2  
320 and those in the S protein at residues N0074 and N0165 (**Fig. 7D**). Finally, a full view of the  
321 ACE2-S complex with Oxford class glycoforms on both proteins illustrates the extensive  
322 glycosylation of the complex (**Fig. 7F, Supplemental Movie D**).

323

## 324 **DISCUSSION**

325 We have defined the glycomics-informed, site-specific microheterogeneity of 22 sites of N-linked  
326 glycosylation per monomer on a SARS-CoV-2 trimer and the 6 sites of N-linked glycosylation on  
327 a soluble version of its human ACE2 receptor using a combination of mass spectrometry  
328 approaches coupled with evolutionary and variant sequence analyses to provide a detailed  
329 understanding of the glycosylation states of these glycoproteins (**Figs. 1-6**). Our results suggest  
330 essential roles for glycosylation in mediating receptor binding, antigenic shielding, and potentially  
331 the evolution/divergence of these glycoproteins.

332 The highly glycosylated SARS-CoV-2 Spike protein, unlike several other viral proteins including  
333 HIV-1 (15) but in agreement with another recent report (19), presents significantly more  
334 processing of N-glycans towards complex glycosylation, suggesting that steric hinderance to  
335 processing enzymes is not a major factor at most sites (**Figs. 2-3**). However, the N-glycans still  
336 provide considerable shielding of the peptide backbone (**Fig. 4**). Although O-glycosylation has  
337 recently been reported for individually-expressed S1 and S2 domains of the Spike glycoprotein  
338 (45), in trimeric form the level of O-glycosylation is extremely low, with the highest level of  
339 occupancy being only 11% at T0323 (**Fig. 4E**). The soluble ACE2 protein examined here contains  
340 6 sites of N-linked glycosylation dominated by complex type N-linked glycans (**Fig. 5**). O-glycans  
341 were also present on this glycoprotein but at very low levels of occupancy at all sites (<2%).

342 Our glycomics-informed glycoproteomics allowed us to assign defined sets of glycans to specific  
343 glycosylation sites on 3D-structures of S and ACE2 glycoproteins based on experimental  
344 evidence (**Figs. 4, 6**). Similar to most other glycoproteins, microheterogeneity is evident at most  
345 glycosylation sites of S and ACE2; each glycosylation site can be modified with one of several  
346 glycan structures, generating site-specific glycosylation portfolios. For modeling purposes,  
347 however, explicit structures must be placed at each glycosylation site. In order to capture the  
348 impact of microheterogeneity on S and ACE2 molecular dynamics we chose to generate  
349 glycoforms for modeling that represented reasonable portfolios of glycan types. Using 3

350 glycoform models for S (Abundance, Oxford Class, and Processed) and 2 models for ACE2  
351 (Abundance, which was equivalent to Oxford Class, and Processed), we generated 3 molecular  
352 dynamic simulations of the co-complexes of these 2 glycoproteins (**Fig. 7 and Supplemental**  
353 **Simulations 1-3**). The observed interactions over time allowed us to evaluate glycan-protein  
354 contacts between the 2 proteins as well as examine potential glycan-glycan interactions (**Fig. 7**).  
355 We observed glycan-mediated interactions between the S trimer and glycans at N090, N322 and  
356 N546 of ACE2. Thus, variations in glycan occupancy or processing at these sites, could alter the  
357 affinity of the SARS-CoV-2 – ACE2 interaction and modulate infectivity. It is well established that  
358 glycosylation states vary depending on tissue and cell type as well as in the case of humans, on  
359 age (49), underlying disease (50,51) and ethnicity (52). Thus glycosylation portfolios may in part  
360 be responsible for tissue tropism and individual susceptibility to infection. The importance of  
361 glycosylation for S binding to ACE2 is even more emphatically demonstrated by the direct glycan-  
362 glycan interactions observed (**Fig. 7D**) between S glycans (at N0074 and N0165) and an ACE2  
363 receptor glycan (at N546), adding an additional layer of complexity for interpreting the impact of  
364 glycosylation on individual susceptibility.

365 Several emerging variants of the virus appear to be altering N-linked glycosylation occupancy by  
366 disrupting N-linked sequons. Interestingly, the 2 N-linked sequons in SARS-CoV-2 S directly  
367 impacted by variants, N0074 and N0149, are in divergent insert regions 1 and 2, respectively, of  
368 SARS-CoV-2 S compared to SARS-CoV-1 S (**Fig. 4A**). The N0074, in particular, is one of the S  
369 glycans that interact directly with ACE2 glycan (at N546), suggesting that glycan-glycan  
370 interactions may contribute to the unique infectivity differences between SARS-CoV-2 and SARS-  
371 CoV-1. These sequon variants will also be important to examine in terms of glycan shielding that  
372 could influence immunogenicity and efficacy of neutralizing antibodies, as well as interactions with  
373 the host cell receptor ACE2. Naturally-occurring amino acid-changing SNPs in the ACE2 gene  
374 generate a number of variants including 1 variant, with a frequency of 3 in 10,000 humans, that  
375 eliminates a site of N-linked glycosylation at N546 (**Fig. 6**). Understanding the impact of ACE2  
376 variants on glycosylation and more importantly on S binding, especially for N546S which impacts

377 the glycan-glycan interaction between S and ACE2 , should be prioritized in light of efforts to  
378 develop ACE2 as a potential decoy therapeutic. Intelligent manipulation of ACE2 glycosylation  
379 may lead to more potent biologics capable of acting as better competitive inhibitors of S binding.  
380 The data presented here, and related similar recent findings (19), provide a framework to facilitate  
381 the production of immunogens, vaccines, antibodies, and inhibitors as well as providing additional  
382 information regarding mechanisms by which glycan microheterogeneity is achieved. However,  
383 considerable efforts still remain in order to fully understand the role of glycans in SARS-CoV-2  
384 infection and pathogenicity. While HEK-expressed S and ACE2 provide a useful window for  
385 understanding human glycosylation of these proteins, glycoproteomic characterization following  
386 expression in cell lines of more direct relevance to disease and target tissue is sorely needed.  
387 While site occupancy will be unlikely to change in different cell lines, processing of N-linked  
388 glycans will almost certainly be altered in a cell-type dependent fashion. Thus, analyses of the  
389 Spike trimer extracted from pseudoviruses, virion-like particles, and ultimately from infectious  
390 SARS-CoV-2 virions harvested from airway cells or patients will provide the most accurate view  
391 of how trimer immunogens reflect the true glycosylation pattern of the virus. Detailed analyses of  
392 the impact of emerging variants in S and natural and designed-for-biologics variants of ACE2 on  
393 glycosylation and binding properties are important next steps for developing therapeutics. Finally,  
394 it will be important to monitor the slow evolution of the virus to determine if existing sites of  
395 glycosylation are lost or new sites emerge with selective pressure that might alter the efficacy of  
396 vaccines, neutralizing antibodies, and/or inhibitors.

397

## 398 **ACKNOWLEDGEMENTS**

399 The authors would like to thank ProteinMetrics for providing licenses for their software used here  
400 and the developers of pGlyco for productive discussions regarding their software. We would also  
401 like to thank Galit Alter of the Ragon Institute for facilitating this collaborative effort. This effort  
402 was facilitated by the ThermoFisher Scientific appointed Center of Excellence in Glycoproteomics  
403 at the Complex Carbohydrate Research Center at the University of Georgia (co-directed by MT

404 and LW). This research is supported in part by R35GM119850 (NEL), NNF10CC1016517 (NEL),  
405 R01AI139238 (MAB), R01AI147884-01A1S1 (BC), Massachusetts Consortium on Pathogen  
406 Readiness (BC), U01CA207824 (R.J.W), P41GM103390 (R.J.W.), P41GM103490 (MT and LW),  
407 U01GM125267 (MT), and R01GM130915 (LW). The content is solely the responsibility of the  
408 authors and does not necessarily represent the official views of the National Institutes of Health.

409

#### 410 **AUTHOR CONTRIBUTIONS**

411 Conceptualization: M.T., B.C., R.J.W. and L.W.; Methodology, Software, Validation, Formal  
412 Analysis, Investigation, Resources, and Data Curation: P.Z., J.L.P., O.C.G., Y.C., T.X., K.E.R.,  
413 K.A., B.P.K., R.B., D.H.B., M.A.B., N.E.L., M.T., B.C., R.J.W., and L.W.; Writing-Original Draft:  
414 P.Z., J.L.P., and L.W.; Writing-Review & Editing: All authors; Visualization: P.Z., J.L.P., O.C.G,  
415 Y.C., M.T., B.C., R.J.W., and L.W.; Supervision, Project Administration, and Funding Acquisition:  
416 D.H.B., M.A.B., N.E.L., M.T., B.C., R.J.W., and L.W..

417

#### 418 **DECLARATION OF INTERESTS**

419 The authors declare no competing interests.

420

#### 421 **FIGURE LEGENDS**

422

423 **Figure 1. Expression and Characterization of SARS-CoV-2 Spike Glycoprotein Trimer**  
424 **Immunogen and Soluble Human ACE2.** A) Sequences of SARS-CoV-2 S immunogen and  
425 soluble human ACE2. The N-terminal pyroglutamines for both mature protein monomers are  
426 bolded, underlined, and shown in green. The canonical N-linked glycosylation sequons are  
427 bolded, underlined, and shown in red. Negative stain electron microscopy of the purified trimer  
428 (B) and Coomassie G-250 stained reducing SDS-PAGE gels (C) confirmed purity of the SARS-  
429 CoV-2 S protein trimer and of the soluble human ACE2. MWM = molecular weight markers. D)  
430 A representative Step-HCD fragmentation spectrum from mass spectrometry analysis of a tryptic



431 digest of S annotated manually based on search results from pGlyco 2.2. This spectrum defines  
432 the N-terminus of the mature protein monomer as (pyro-)glutamine 0014. A representative N-  
433 glycan consistent with this annotation and our glycomics data (Fig. 2) is overlaid using the Symbol  
434 Nomenclature For Glycans (SNFG) code. This complex glycan occurs at N0017. Note, that as  
435 expected, the cysteine is carbamidomethylated and the mass accuracy of the assigned peptide  
436 is 0.98 ppm. On the sequence of the N-terminal peptide and in the spectrum, the assigned b (blue)  
437 and y (red) ions are shown. In the spectrum, purple highlights glycan oxonium ions and green  
438 marks intact peptide fragment ions with various partial glycan sequences still attached. Note that  
439 the green labeled ions allow for limited topology to be extracted including defining that the fucose  
440 is on the core and not the antennae of the glycopeptide.

441

442 **Figure 2. Glycomics Informed Glycoproteomics Reveals Substantial Site-Specific**  
443 **Microheterogeneity of N-linked Glycosylation on SARS-CoV-2 S.** A) Glycans released from  
444 SARS-CoV-2 S protein trimer immunogen were permethylated and analyzed by MSn. Structures  
445 were assigned, grouped by type and structural features, and prevalence was determined based  
446 on ion current. The pie chart shows basic division by broad N-glycan type. The bar graph provides  
447 additional detail about the glycans detected. The most abundant structure with a unique  
448 categorization by glycomics for each N-glycan type in the pie chart, or above each feature  
449 category in the bar graph, is indicated. B – E) Glycopeptides were prepared from SARS-CoV-2  
450 S protein trimer immunogen using multiple combinations of proteases, analyzed by LC-MSn, and  
451 the resulting data was searched using several different software packages. Four representative  
452 sites of N-linked glycosylation with specific features of interest were chosen and are presented  
453 here. N0074 (B) and N0149 (C) are shown that occur in variable insert regions of S compared to  
454 SARS-CoV and other related coronaviruses, and there are emerging variants of SARS-CoV-2  
455 that disrupt these two sites of glycosylation in S. N0234 (D) contains the most high-mannose N-  
456 linked glycans. N0801 (D) is an example of glycosylation in the S2 region of the immunogen and  
457 displays a high degree of hybrid glycosylation compared to other sites. The abundance of each

458 composition is graphed in terms of assigned spectral counts. Representative glycans (as  
459 determined by glycomics analysis) for several abundant compositions are shown in SNFG format.  
460 The abbreviations used here and throughout the manuscript are N for HexNAc, H for Hexose, F  
461 for Fucose, and A for Neu5Ac. Note that the graphs for the other 18 sites and other graphs  
462 grouping the microheterogeneity observed by other properties are presented in Supplemental  
463 Information.

464

465 **Figure 3. SARS-CoV-2 S Immunogen N-glycan Sites are Predominantly Modified by**  
466 **Complex N-glycans.** N-glycan topologies were assigned to all 22 sites of the S protomer and  
467 the spectral counts for each of the 3 types of N-glycans (high-mannose, hybrid, and complex) as  
468 well as the unoccupied peptide spectral match counts at each site were summed and visualized  
469 as pie charts. Note that only N1173 and N1194 show an appreciable amount of the unoccupied  
470 amino acid.

471

472 **Figure 4. 3D Structural Modeling of Glycosylated SARS-CoV-2 Spike Trimer Immunogen**  
473 **Reveals Predictions for Antigen Accessibility and Other Key Features.** Results from  
474 glycomics and glycoproteomics experiments were combined with results from bioinformatics  
475 analyses and used to model several versions of glycosylated SARS-CoV-2 S trimer immunogen.  
476 A) Sequence of the SARS-CoV-2 S immunogen displaying computed antigen accessibility and  
477 other information. Antigen accessibility is indicated by red shading across the amino acid  
478 sequence. B) Emerging variants confirmed by independent sequencing experiments were  
479 analyzed based on the 3D structure of SARS-CoV-2 S to generate a proximity chart to the  
480 determined N-linked glycosylation sites. C) SARS-CoV-2 S trimer immunogen model from MD  
481 simulation displaying abundance glycoforms and antigen accessibility shaded in red for most  
482 accessible, white for partial, and black for inaccessible (see **supplemental movie A**). D) SARS-  
483 CoV-2 S trimer immunogen model from MD simulation displaying oxford class glycoforms and  
484 sequence variants. \* indicates not visible while the box represents 3 amino acid variants that are

485 clustered together in 3D space. E) SARS-CoV-2 S trimer immunogen model from MD simulation  
486 displaying processed glycoforms plus shading of Thr-323 that has O-glycosylation at low  
487 stoichiometry in yellow.

488

489 **Figure 5: Glycomics Informed Glycoproteomics of Soluble Human ACE2 Reveals High**

490 **Occupancy, Complex N-linked Glycosylation.** A) Glycans released from soluble, purified

491 ACE2 were permethylated and analyzed by MSn. Structures were assigned, grouped by type and

492 structural features, and prevalence was determined based on ion current. The pie chart shows

493 basic division by broad N-glycan type. The bar graph provides additional detail about the glycans

494 detected. The most abundant structure with a unique categorization by glycomics for each N-

495 glycan type in the pie chart, or above each feature category in the bar graph, is indicated. B – G)

496 Glycopeptides were prepared from soluble human ACE2 using multiple combinations of

497 proteases, analyzed by LC-MSn, and the resulting data was searched using several different

498 software packages. All six sites of N-linked glycosylation are presented here. Displayed in the bar

499 graphs are the individual compositions observed graphed in terms of assigned spectral counts.

500 Representative glycans (as determined by glycomics analysis) for several abundant compositions

501 are shown in SNFG format. The abbreviations used here and throughout the manuscript are N

502 for HexNAc, H for Hexose, F for Fucose, and A for Neu5Ac. The pie chart (analogous to Figure

503 3 for SARS-CoV-2 S) for each site is displayed in the upper right corner of each panel. B) N053.

504 C) N090. D) N103. E) N322. F) N432. G) N546, a site that does not exist in 3 in 10,000 people.

505

506 **Figure 6: 3D Structural Modeling of Glycosylated Soluble Human ACE2.** Results from

507 glycomics and glycoproteomics experiments were combined with results from bioinformatics

508 analyses and used to model several versions of glycosylated soluble human ACE2. A) Sequence

509 of soluble human ACE2. The one variant with a reported MAF in NCBI dbSNP (MAF = 0.0003)

510 that removes an N-glycan sequon (N546S) is highlighted in pink. B) Soluble human ACE2 model

511 from MD simulations displaying abundance glycoforms, interaction surface with S, and sequence

512 variants. N546 variant is boxed that would remove N-linked glycosylation at that site (see  
513 **supplemental movie B**). C) Soluble human ACE2 model from MD simulations displaying  
514 processed glycoforms.

515

516 **Figure 7: Interactions of Glycosylated Soluble Human ACE2 and Glycosylated SARS-CoV-**  
517 **2 S Trimer Immunogen Revealed By 3D-Structural Modeling and Molecular Dynamics**

518 **Simulations.** A) Primary Sequence of S and ACE2 shaded for Protein-Glycan interactions  
519 uncovered by molecular dynamic simulations. On S, red shading displays interactions with ACE2  
520 N090 glycan, green displays interactions with ACE2 N322 glycan, and blue displays interaction  
521 with ACE2 N546 glycan. Combined colors on S represent interactions with multiple Ace glycans  
522 from the set. On ACE2, red shading displays interactions with S N0074 glycan, green shading  
523 displays interactions with S N0165 glycan. Yellow on ACE2 represents interactions with both  
524 glycans. B) Molecular dynamics simulation of glycosylated soluble human ACE2 and  
525 glycosylated SARS-CoV-2 S trimer immunogen interaction displayed with 180 degree rotation.  
526 ACE2 (top) is colored red with glycans in pink while S is colored white with glycans in dark grey.  
527 Highlighted are ACE2 glycans that interacts with S (see **supplemental simulations 1-3**). C)  
528 Zoom in images of ACE2-S interface highlighting Ace 2 glycan-S protein interactions. D) Zoom  
529 in of ACE2-S interface highlighting ACE2 and S glycan interactions using 3D-SNFG icons (53)  
530 with S protein (pink) as well as ACE2-S glycan-glycan interactions. E) Zoom in of dynamics  
531 trajectory of glycans at the interface of soluble human ACE2 and S (see **supplemental movie**  
532 **C**). F) Full view of molecular dynamic trajectory of oxford class glycans simulated on the ACE2-  
533 S complex (see **supplemental movie D**).

534

## 535 **STAR METHODS**

### 536 **KEY RESOURCES TABLE**

| REAGENT or RESOURCE                           | SOURCE     | IDENTIFIER |
|-----------------------------------------------|------------|------------|
| Chemicals, Peptides, and Recombinant Proteins |            |            |
| SARS-CoV-2 S protein                          | This Study | N/A        |

|                                                                                   |                                                                              |                  |
|-----------------------------------------------------------------------------------|------------------------------------------------------------------------------|------------------|
| Human ACE2 protein                                                                | This Study                                                                   | N/A              |
| 2x Laemmli sample buffer                                                          | Bio-Rad                                                                      | Cat#161-0737     |
| Invitrogen NuPAGE 4 to 12%, Bis-Tris, Mini Protein Gel                            | Thermo Fisher Scientific                                                     | Cat#NP0321PK2    |
| Coomassie Brilliant Blue G-250 Dye                                                | Thermo Fisher Scientific                                                     | Cat#20279        |
| Dithiothreitol                                                                    | Sigma Aldrich                                                                | Cat#43815        |
| Iodoacetamide                                                                     | Sigma Aldrich                                                                | Cat#I1149        |
| Trypsin                                                                           | Promega                                                                      | Cat#V5111        |
| Lys-C                                                                             | Promega                                                                      | Cat#V1671        |
| Arg-C                                                                             | Promega                                                                      | Cat#V1881        |
| Glu-C                                                                             | Promega                                                                      | Cat#V1651        |
| Asp-N                                                                             | Promega                                                                      | Cat#VA1160       |
| Endoglycosidase H                                                                 | Promega                                                                      | Cat#V4871        |
| PNGaseF                                                                           | Promega                                                                      | Cat#V4831        |
| Chymotrypsin                                                                      | Athens Research and Technology                                               | Cat#16-19-030820 |
| Alpha lytic protease                                                              | New England BioLabs                                                          | Cat#P8113        |
| 18O water                                                                         | Cambridge Isotope Laboratories                                               | OLM-782-10-1     |
| O-protease OperATOR                                                               | Genovis                                                                      | Cat#G1-OP1-020   |
| <b>Deposited Data</b>                                                             |                                                                              |                  |
| MS data for site-specific N-linked glycopeptides for SARS-Cov-2 S and human ACE2  | This Study                                                                   | PXD019937        |
| MS data for site-specific O-linked glycopeptides for SARS-Cov-2 S and human ACE2  | This Study                                                                   | PXD019940        |
| MS data for deglycosylated N-linked glycopeptides for SARS-Cov-2 S and human ACE2 | This Study                                                                   | PXD019938        |
| MS data for disulfide bond analysis for SARS-Cov-2 S                              | This Study                                                                   | PXD019939        |
| <b>Experimental Models: Cell Lines</b>                                            |                                                                              |                  |
| 293-F Cells                                                                       | Gibco                                                                        | Cat#R79007       |
| <b>Experimental Models: Organisms/Strains</b>                                     |                                                                              |                  |
| VSV(G)-Pseudoviruses                                                              | This Study                                                                   |                  |
| <b>Software and Algorithms</b>                                                    |                                                                              |                  |
| pGlyco                                                                            | (43)                                                                         | v2.2.2           |
| Proteome Discoverer                                                               | Thermo Fisher Scientific                                                     | v1.4             |
| Byonic                                                                            | Protein Metrics Inc. (44)                                                    | v3.8.13          |
| ProteolQ                                                                          | Premier Biosoft                                                              | v2.7             |
| GRITS Toolbox                                                                     | <a href="http://www.grits-toolbox.org">http://www.grits-toolbox.org</a> (37) | v1.1             |
| EMBOSS needle                                                                     | (54)                                                                         | v6.6.0           |
| Biopython                                                                         | <a href="https://biopython.org/">https://biopython.org/</a>                  | v1.76            |
| Rpdb                                                                              | <a href="https://rdrr.io/cran/Rpdb/">https://rdrr.io/cran/Rpdb/</a>          | v2.3             |

|                    |                                                                                                    |          |
|--------------------|----------------------------------------------------------------------------------------------------|----------|
| SignalP            | <a href="http://www.cbs.dtu.dk/services/SignalP/">http://www.cbs.dtu.dk/services/SignalP/</a> (34) | v5.0     |
| LibreOFFICE Writer | The Document Foundation                                                                            | V6.4.4.2 |
|                    |                                                                                                    |          |

537

## 538 LEAD CONTACT

539 Further information and requests for resources and reagents should be directed to and will be  
540 fulfilled by the Lead Contact, Peng Zhao ([pengzhao@uga.edu](mailto:pengzhao@uga.edu)) and/or Lance Wells  
541 ([lwells@ccrc.uga.edu](mailto:lwells@ccrc.uga.edu)).

542

## 543 METHOD DETAILS

### 544 Expression, Purification, and Characterization of SARS-CoV-2 S and Human ACE2

#### 545 Proteins

546 To express a stabilized ectodomain of Spike protein, a synthetic gene encoding residues  
547 1–1208 of SARS-CoV-2 Spike with the furin cleavage site (residues 682–685) replaced by a  
548 “GGSG” sequence, proline substitutions at residues 986 and 987, and a foldon trimerization  
549 motif followed by a C-terminal 6xHisTag was created and cloned into the mammalian  
550 expression vector pCMV-IRES-puro (Codex BioSolutions, Inc, Gaithersburg, MD). The  
551 expression construct was transiently transfected in HEK 293F cells using polyethylenimine  
552 (Polysciences, Inc, Warrington, PA). Protein was purified from cell supernatants using Ni-NTA  
553 resin (Qiagen, Germany), the eluted fractions containing S protein were pooled, concentrated,  
554 and further purified by gel filtration chromatography on a Superose 6 column (GE Healthcare).  
555 Negative stain electron microscopy (EM) analysis was performed as described (55).  
556 The DNA fragment encoding human ACE2 (1-615) with a 6xHis tag at C terminus was  
557 synthesized by Genscript and cloned to the vector pCMV-IRES-puro. The expression construct  
558 was transfected in HEK293F cells using polyethylenimine. The medium was discarded and  
559 replaced with FreeStyle 293 medium after 6-8 hours. After incubation in 37 °C with 5.5% CO<sub>2</sub>

560 for 5 days, the supernatant was collected and loaded to Ni-NTA resin for purification. The  
561 elution was concentrated and further purified by a Superdex 200 column.

### 562 **In-Gel Analysis of SARS-CoV-2 S and Human ACE2 Proteins**

563 A 3.5- $\mu$ g aliquot of SARS-CoV-2 S protein as well as a 2- $\mu$ g aliquot of human ACE2 were  
564 combined with Laemmli sample buffer, analyzed on a 4-12% Invitrogen NuPage Bis-Tris gel  
565 using the MES pH 6.5 running buffer, and stained with Coomassie Brilliant Blue G-250.

### 566 **Analysis of N-linked and O-linked Glycans Released from SARS-Cov-2 S and Human** 567 **ACE2 Proteins**

568 Aliquots of approximately 25-50  $\mu$ g of S or ACE2 protein were processed for glycan  
569 analysis as previously described (35,36). For N-linked glycan analysis, the proteins  
570 were reduced, alkylated, and digested with trypsin. Following trypsinization,  
571 glycopeptides were enriched by C18 Sep-Pak and subjected to PNGaseF digestion to  
572 release N-linked glycans. Following PNGaseF digestion, released glycans were  
573 separated from residual glycosylated peptides bearing O-linked glycans by C18 Sep-  
574 Pak. O-glycosylated peptides were eluted from the Sep-Pak and subjected to reductive  
575  $\beta$ -elimination to release the O-glycans. Another 50  $\mu$ g aliquot of each protein was  
576 denatured with SDS and digested with PNGaseF to remove N-linked glycans. The de-  
577 N-glycosylated, intact protein was then subjected to reductive  $\beta$ -elimination to release  
578 O-glycans. The profiles of O-glycans released from peptides or from intact protein were  
579 found to be comparable. N- and O-linked glycans released from glycoproteins were  
580 permethylated with methyl iodide according to the method of Anumula and Taylor prior  
581 to MS analysis (56). Glycan structural analysis was performed using an LTQ-Orbitrap  
582 instrument (Orbitrap Discovery, ThermoFisher). Detection and relative quantification of  
583 the prevalence of individual glycans was accomplished using the total ion mapping

584 (TIM) and neutral loss scan (NL scan) functionality of the Xcalibur software package  
585 version 2.0 (Thermo Fisher Scientific) as previously described (35,36). Mass accuracy  
586 and detector response was tuned with a permethylated oligosaccharide standard in  
587 positive ion mode. For fragmentation by collision-induced dissociation (CID in MS2 and  
588 MSn), normalized collision energy of 45% was applied. Most permethylated glycans  
589 were identified as singly or doubly charged, sodiated species [M+Na] in positive mode.  
590 Peaks for all charge states were deconvoluted by the charge state and summed for  
591 quantification. All spectra were manually interpreted and annotated. The explicit  
592 identities of individual monosaccharide residues have been assigned based on known  
593 human biosynthetic pathways. Graphical representations of monosaccharide residues  
594 are consistent with the Symbol Nomenclature for Glycans (SNFG), which has been  
595 broadly adopted by the glycomics community (57). The MS-based glycomics data  
596 generated in these analyses and the associated annotations are presented in  
597 accordance with the MIRAGE standards and the Athens Guidelines (58).

#### 598 **Analysis of Disulfide Bonds for SARS-Cov-2 S Protein by LC-MS**

599 Two 10- $\mu$ g aliquots of SARS-CoV-2 S protein were reduced by incubating with 20% acetonitrile  
600 at room temperature and alkylated by 13.75 mM of iodoacetamide at room temperature in dark.  
601 The two aliquots of proteins were then digested respectively using alpha lytic protease, or a  
602 combination of trypsin, Lys-C and Glu-C. Following digestion, the proteins were deglycosylated  
603 by PNGaseF treatment. The resulting peptides were separated on an Acclaim PepMap RSLC  
604 C18 column (75  $\mu$ m x 15 cm) and eluted into the nano-electrospray ion source of an Orbitrap  
605 Fusion™ Lumos™ Tribrid™ mass spectrometer at a flow rate of 200 nL/min. The elution  
606 gradient consists of 1-40% acetonitrile in 0.1% formic acid over 370 minutes followed by 10  
607 minutes of 80% acetonitrile in 0.1% formic acid. The spray voltage was set to 2.2 kV and the



608 temperature of the heated capillary was set to 280 °C. Full MS scans were acquired from m/z  
609 200 to 2000 at 60k resolution, and MS/MS scans following electron transfer dissociation (ETD)  
610 were collected in the orbitrap at 15k resolution. The raw spectra were analyzed by Byonic  
611 (v3.8.13, Protein Metrics Inc.) with mass tolerance set as 20 ppm for both precursors and  
612 fragments. The search output was filtered at 0.1% false discovery rate and 10 ppm mass error.  
613 The spectra assigned as cross-linked peptides were manually evaluated for Cys0015.

614 **Analysis of Site-Specific N-linked Glycopeptides for SARS-Cov-2 S and Human ACE2**  
615 **Proteins by LC-MS**

616 Four 3.5- $\mu$ g aliquots of SARS-CoV-2 S protein were reduced by incubating with 10 mM of  
617 dithiothreitol at 56 °C and alkylated by 27.5 mM of iodoacetamide at room temperature in dark.  
618 The four aliquots of proteins were then digested respectively using alpha lytic protease,  
619 chymotrypsin, a combination of trypsin and Glu-C, or a combination of Glu-C and AspN. Three  
620 10- $\mu$ g aliquots of ACE2 protein were reduced by incubating with 5 mM of dithiothreitol at 56 °C  
621 and alkylated by 13.75 mM of iodoacetamide at room temperature in dark. The three aliquots of  
622 proteins were then digested respectively using alpha lytic protease, chymotrypsin, or a  
623 combination of trypsin and Lys-C. The resulting peptides were separated on an Acclaim  
624 PepMap RSLC C18 column (75  $\mu$ m x 15 cm) and eluted into the nano-electrospray ion source  
625 of an Orbitrap Fusion™ Lumos™ Tribrid™ mass spectrometer at a flow rate of 200 nL/min. The  
626 elution gradient consists of 1-40% acetonitrile in 0.1% formic acid over 370 minutes followed by  
627 10 minutes of 80% acetonitrile in 0.1% formic acid. The spray voltage was set to 2.2 kV and the  
628 temperature of the heated capillary was set to 280 °C. Full MS scans were acquired from m/z  
629 200 to 2000 at 60k resolution, and MS/MS scans following higher-energy collisional dissociation  
630 (HCD) with stepped collision energy (15%, 25%, 35%) were collected in the orbitrap at 15k  
631 resolution. pGlyco v2.2.2 (43) was used for database searches with mass tolerance set as 20  
632 ppm for both precursors and fragments. The database search output was filtered to reach a 1%  
633 false discovery rate for glycans and 10% for peptides. Quantitation was performed by

634 calculating spectral counts for each glycan composition at each site. Any N-linked glycan  
635 compositions identified by only one spectra were removed from quantitation. N-linked glycan  
636 compositions were categorized into the 21 oxford classes: HexNAc(2)Hex(9~5)Fuc(0~1) was  
637 classified as M9 to M5 respectively; HexNAc(2)Hex(4~1)Fuc(0~1) was classified as M1-M4;  
638 HexNAc(3~6)Hex(5~9)Fuc(0)NeuAc(0~1) was classified as Hybrid with  
639 HexNAc(3~6)Hex(5~9)Fuc(1~2)NeuAc(0~1) classified as F-Hybrid; Complex-type glycans are  
640 classified based on the number of antenna and fucosylation:  
641 HexNAc(3)Hex(3~4)Fuc(0)NeuAc(0~1) is assigned as A1 with  
642 HexNAc(3)Hex(3~4)Fuc(1~2)NeuAc(0~1) assigned as F-A1;  
643 HexNAc(4)Hex(3~5)Fuc(0)NeuAc(0~2) is assigned as A2/A1B with  
644 HexNAc(4)Hex(3~5)Fuc(1~5)NeuAc(0~2) assigned as F-A2/A1B;  
645 HexNAc(5)Hex(3~6)Fuc(0)NeuAc(0~3) is assigned as A3/A2B with  
646 HexNAc(5)Hex(3~6)Fuc(1~3)NeuAc(0~3) assigned as F-A3/A2B;  
647 HexNAc(6)Hex(3~7)Fuc(0)NeuAc(0~4) is assigned as A4/A3B with  
648 HexNAc(6)Hex(3~7)Fuc(1~3)NeuAc(0~4) assigned as F-A4/A3B;  
649 HexNAc(7)Hex(3~8)Fuc(0)NeuAc(0~1) is assigned as A5/A4B with  
650 HexNAc(7)Hex(3~8)Fuc(1~3)NeuAc(0~1) as F-A5/A4B; HexNAc(8)Hex(3~9)Fuc(0) is assigned  
651 as A6/A5B with HexNAc(8)Hex(3~9)Fuc(1) assigned as F-A6/A5B.

#### 652 **Analysis of Deglycosylated SARS-Cov-2 S and Human ACE2 Proteins by LC-MS**

653 Three 3.5- $\mu$ g aliquots of SARS-CoV-2 S protein were reduced by incubating with 10 mM of  
654 dithiothreitol at 56 °C and alkylated by 27.5 mM of iodoacetamide at room temperature in dark.  
655 The three aliquots were then digested respectively using chymotrypsin, Asp-N, or a combination  
656 of trypsin and Glu-C. Two 10- $\mu$ g aliquots of ACE2 protein were reduced by incubating with 5  
657 mM of dithiothreitol at 56 °C and alkylated by 13.75 mM of iodoacetamide at room temperature  
658 in dark. The two aliquots were then digested respectively using chymotrypsin, or a combination  
659 of trypsin and Lys-C. Following digestion, the proteins were deglycosylated by Endoglycosidase

660 H followed by PNGaseF treatment in the presence of 18O water. The resulting peptides were  
661 separated on an Acclaim PepMap RSLC C18 column (75  $\mu$ m x 15 cm) and eluted into the nano-  
662 electrospray ion source of an Orbitrap Fusion™ Lumos™ Tribrid™ mass spectrometer at a flow  
663 rate of 200 nL/min. The elution gradient consists of 1-40% acetonitrile in 0.1% formic acid over  
664 370 minutes followed by 10 minutes of 80% acetonitrile in 0.1% formic acid. The spray voltage  
665 was set to 2.2 kV and the temperature of the heated capillary was set to 280 °C. Full MS scans  
666 were acquired from m/z 200 to 2000 at 60k resolution, and MS/MS scans following collision-  
667 induced dissociation (CID) at 38% collision energy were collected in the ion trap. The spectra  
668 were analyzed using SEQUEST (Proteome Discoverer 1.4) with mass tolerance set as 20 ppm  
669 for precursors and 0.5 Da for fragments. The search output was filtered using ProteoIQ (v2.7) to  
670 reach a 1% false discovery rate at protein level and 10% at peptide level. Occupancy of each N-  
671 linked glycosylation site was calculated using spectral counts assigned to the 18O-Asp-  
672 containing (PNGaseF-cleaved) and/or HexNAc-modified (EndoH-cleaved) peptides and their  
673 unmodified counterparts.

674 **Analysis of Site-Specific O-linked Glycopeptides for SARS-Cov-2 S and Human ACE2**  
675 **Proteins by LC-MS**

676 Three 10- $\mu$ g aliquots of SARS-CoV-2 S protein and one 10- $\mu$ g aliquot of ACE2 protein were  
677 reduced by incubating with 5 mM of dithiothreitol at 56 °C and alkylated by 13.75 mM of  
678 iodoacetamide at room temperature in dark. The four aliquots were then digested respectively  
679 using trypsin, Lys-C, Arg-C, or a combination of trypsin and Lys-C. Following digestion, the  
680 proteins were deglycosylated by PNGaseF treatment and then digested with O-protease  
681 OpeRATOR®. The resulting peptides were separated on an Acclaim PepMap RSLC C18  
682 column (75  $\mu$ m x 15 cm) and eluted into the nano-electrospray ion source of an Orbitrap  
683 Fusion™ Lumos™ Tribrid™ mass spectrometer at a flow rate of 200 nL/min. The elution  
684 gradient consists of 1-40% acetonitrile in 0.1% formic acid over 370 minutes followed by 10  
685 minutes of 80% acetonitrile in 0.1% formic acid. The spray voltage was set to 2.2 kV and the

686 temperature of the heated capillary was set to 280 °C. Full MS scans were acquired from m/z  
687 200 to 2000 at 60k resolution, and MS/MS scans following higher-energy collisional dissociation  
688 (HCD) with stepped collision energy (15%, 25%, 35%) or electron transfer dissociation (ETD)  
689 were collected in the orbitrap at 15k resolution. The raw spectra were analyzed by Byonic  
690 (v3.8.13) with mass tolerance set as 20 ppm for both precursors and fragments. MS/MS filtering  
691 was applied to only allow for spectra where the oxonium ions of HexNAc were observed. The  
692 search output was filtered at 0.1% false discovery rate and 10 ppm mass error. The spectra  
693 assigned as O-linked glycopeptides were manually evaluated. Quantitation was performed by  
694 calculating spectral counts for each glycan composition at each site. Any O-linked glycan  
695 compositions identified by only one spectra were removed from quantitation. Occupancy of each  
696 O-linked glycosylation site was calculated using spectral counts assigned to any glycosylated  
697 peptides and their unmodified counterparts from searches without MS/MS filtering.

#### 698 **Sequence Analysis of SARS-CoV-2 S and Human ACE2 Proteins**

699 The genomes of SARS-CoV as well as bat and pangolin coronavirus sequences reported to be  
700 closely related to SARS-CoV-2 were downloaded from NCBI. The S protein sequences from all  
701 of those genomes were aligned using EMBOSS needle v6.6.0 (54) via the EMBL-EBI provided  
702 web service (59). Manual analysis was performed in the regions containing canonical N-  
703 glycosylation sequons (N-X-S/T). For further sequence analysis of SARS-CoV-2 S variants, the  
704 genomes of SARS-CoV-2 were downloaded from NCBI and GISAID and further processed  
705 using Biopython 1.76 to extract all sequences annotated as “surface glycoprotein” and to  
706 remove any incomplete sequence as well as any sequence containing unassigned amino acids.  
707 For sequence analysis of human ACE2 variants, the single nucleotide polymorphisms (SNPs) of  
708 ACE2 were extracted from the NCBI dbSNP database and filtered for missense mutation entries  
709 with a reported minor allele frequency. Manual analysis was performed on both SARS-CoV-2 S  
710 and human ACE2 variants to further examine the regions containing canonical N-glycosylation

711 sequons (N-X-S/T). LibreOffice Writer was used to shade regions on the linear sequence of S  
712 and ACE2.

### 713 **3D Structural Modeling and Molecular Dynamic Simulation of Glycosylated SARS-CoV-2** 714 **S and Human ACE2 Proteins**

715 *SARS-CoV2 spike (S) protein structure and ACE2 co-complex* – A 3D structure of the prefusion  
716 form of the S protein (RefSeq: YP\_009724390.1, UniProt: P0DTC2 SPIKE\_SARS2), based on a  
717 Cryo-EM structure (PDB code 6VSB) (46), was obtained from the SWISS-MODEL server  
718 ([swissmodel.expasy.org](http://swissmodel.expasy.org)). The model has 95% coverage (residues 27 to 1146) of the S protein.  
719 The receptor binding domain (RBD) in the “open” conformation was replaced with the RBD from  
720 an ACE2 co-complex (PDB code 6M0J) by grafting residues C336 to V524.

721 *Glycoform generation* – 3D structures of the three glycoforms (abundance, oxford class,  
722 processed) were generated for the SARS-CoV2 S protein alone, and in complex with the  
723 glycosylated ACE2 protein. The glycoprotein builder available at GLYCAM-Web  
724 ([www.glycam.org](http://www.glycam.org)) was employed together with an in-house program that adjusts the asparagine  
725 side chain torsion angles and glycosidic linkages within known low-energy ranges (60) to relieve  
726 any atomic overlaps with the core protein, as described previously (61,62).

727 *Energy minimization and Molecular dynamics (MD) simulations* – Each glycosylated structure  
728 was placed in a periodic box of TIP3P water molecules with a 10 Å buffer between the solute  
729 and the box edge. Energy minimization of all atoms was performed for 20,000 steps (10,000  
730 steepest decent, followed by 10,000 conjugant gradient) under constant pressure (1 atm) and  
731 temperature (300 K) conditions. All MD simulations were performed under nPT conditions with  
732 the CUDA implementation of the PMEMD (63,64) simulation code, as present in the Amber14  
733 software suite (University of California, San Diego). The GLYCAM06j force field (65) and  
734 Amber14SB force field (66) were employed for the carbohydrate and protein moieties,  
735 respectively. A Berendsen barostat with a time constant of 1 ps was employed for pressure  
736 regulation, while a Langevin thermostat with a collision frequency of 2 ps<sup>-1</sup> was employed for

737 temperature regulation. A nonbonded interaction cut-off of 8 Å was employed. Long-range  
738 electrostatics were treated with the particle-mesh Ewald (PME) method (67). Covalent bonds  
739 involving hydrogen were constrained with the SHAKE algorithm, allowing an integration time  
740 step of 2 fs to be employed. The energy minimized coordinates were equilibrated at 300K over  
741 400 ps with restraints on the solute heavy atoms. Each system was then equilibrated with  
742 restraints on the C $\alpha$  atoms of the protein for 1ns, prior to initiating 4 independent 250 ns  
743 production MD simulations with random starting seeds for a total time of 1  $\mu$ s per system, with  
744 no restraints applied.

745 *Antigenic surface analysis.* A series of 3D structure snapshots of the simulation were taken at 1  
746 ns intervals and analysed in terms of their ability to interact with a spherical probe based on the  
747 average size of hypervariable loops present in an antibody complementarity determining region  
748 (CDR), as described recently (<https://www.biorxiv.org/content/10.1101/2020.04.07.030445v2>).

749 The percentage of simulation time each residue was exposed to the AbASA probe was  
750 calculated and plotted onto both the 3D structure and primary sequence.

751

#### 752 **Analysis of SARS-CoV-2 Spike VSV pseudoparticles (ppVSV-SARS-2-S)**

753 293T cells were transfected with an expression plasmid encoding SARS-CoV-2 Spike  
754 (pcDNAintron-SARS-2-S $\Delta$ 19). To increase cell surface expression, the last 19 amino acids  
755 containing the Golgi retention signal were removed. Two S $\Delta$ 19 constructs were compared, one  
756 started with Met1 and the other with Met2. Twenty-four hours following transfection, cells were  
757 transduced with ppVSV $\Delta$ G-VSV-G (particles that were pseudotyped with VSV-G in trans). One  
758 hour following transduction cells were extensively washed and media was replaced.

759 Supernatant containing particles were collected 12-24 hour following transduction and cleared  
760 through centrifugation. Cleared supernatant was frozen at -80°C for future use. Target cells  
761 VeroE6 were seeded in 24-well plates (5x10<sup>5</sup> cells/mL) at a density of 80% coverage. The  
762 following day, ppVSV-SARS-2-S/GFP particles were transduced into target cells for 60 minutes,  
763 particles pseudotyped with VSV-G, Lassa virus GP, or no glycoprotein were included as

764 controls. 24 hours following transduction, transduced cells were released from the plate with  
765 trypsin, fixed with 4% formaldehyde, and GFP-positive virus-transduced cells were quantified  
766 using flow cytometry (Bectin Dickson BD-LSRII). To quantify the ability of various SARS-CoV-2  
767 S mutants to mediate fusion, effector cells (HEK293T) were transiently transfected with the  
768 indicated pcDNAintron-SARS-2-S expression vector or measles virus H and F (68). Effector  
769 cells were infected with MVA-T7 four hours following transduction to produce the T7 polymerase  
770 (69). Target cells naturally expressing the receptor ACE2 (Vero) or ACE2 negative cells  
771 (HEK293T) were transfected with pTM1-luciferase, which encodes for firefly luciferase under the  
772 control of a T7 promoter (70). 24 hours following transfection, the target cells were lifted and  
773 added to the effector cells at a 1:1 ratio. 4 hours following co-cultivation, cells were washed,  
774 lysed and luciferase levels were quantified using Promega's Steady-Glo substrate. To visualize  
775 cell-to-cell fusion, Vero cells were co-transfected with pGFP and the pcDNAintron-SARS-2-S  
776 constructs. 24 hours following transfection, syncytia was visualized by fluorescence microscopy.

#### 777 **DATA AVAILABILITY**

778 The mass spectrometry proteomics data are available via ProteomeXchange with identifiers  
779 listed in the KEY RESOURCES TABLE.

#### 780 **SUPPLEMENTAL INFORMATION**

781 Tables (1, 11 tabs), Figures (10), Movies (4), and Simulations (3).

#### 782 **SUPPLEMENTAL LEGEND:**

783 **Supplemental Table, Tab 1.** Glycans modeled as Abundance, Oxford Class, and Processed.

784 **Supplemental Table, Tab 2.** Cys0015-Cys0136 Disulfide Linked Peptide for SARS-CoV-2 S.

785 **Supplemental Table Tab 3.** Detection of N-linked glycans released from SARS-CoV-2 S and

786 human ACE2. Relative abundance (prevalence) of each species is calculated based on peak

787 intensity in full MS.

788 **Supplemental Table Tab 4.** Detection of O-linked glycans released from SARS-CoV-2 S and  
789 human ACE2. Relative abundance (prevalence) of each species is calculated based on peak  
790 intensity in full MS.

791 **Supplemental Table Tab 5.** N-linked glycan occupancy at each site of SARS-CoV-2 S and  
792 human ACE2. Occupancy is calculated using spectral counts assigned to the 18O-Asp-  
793 containing (PNGaseF-cleaved) and/or HexNAc-modified (EndoH-cleaved) peptides and their  
794 unmodified counterparts. Sequon refers to the Asn-x-Ser/Thr/Cys, Asn-Gly-x sequences.

795 **Supplemental Table Tab 6.** N-linked glycan compositions identified at each site of SARS-CoV-  
796 2 S and human ACE2. Asn(N)# indicates the numbers of asparagines in protein sequences. In  
797 compositions: N=HexNAc, H=Hexose (Hex), F=Fucose (Fuc), and A=Neu5Ac. In fucosylation:  
798 NoFuc=No Fuc identified; 1Core=One Fuc identified at core position; 1Term=One Fuc identified  
799 at terminal position; 1Core and 1Term=One Fuc identified as a mixture of core and terminal  
800 positions; 1Core1Term=Two Fuc identified and one is at core and the other is at terminal;  
801 2Term=Two Fuc identified at terminal positions; 1Core1Term and 2Term=Two Fuc identified as  
802 a mixture of core and terminal positions; 1Core2Term=Three Fuc identified and one is at core  
803 and the others are at terminal; 3Term=Three Fuc identified at terminal positions; 1Core2Term  
804 and 3Term=Three Fuc identified as a mixture of core and terminal positions; 1Core3Term=Four  
805 Fuc identified and one is at core and the others are at terminal; 4Term=Four Fuc identified at  
806 terminal positions; 1Core3Term and 4Term=Four Fuc identified as a mixture of core and  
807 terminal positions; 1Core4Term=Five Fuc identified and one is at core and the others are at  
808 terminal.

809 **Supplemental Table Tab 7.** N-linked glycan types identified at each site of SARS-CoV-2 S and  
810 human ACE2. All N-linked glycans are categorized into 3 types: high-mannose, hybrid and  
811 complex.

812 **Supplemental Table Tab 8.** N-linked glycan oxford classes identified at each site of SARS-  
813 CoV-2 S and human ACE2. All N-linked glycan compositions are categorized into 21 classes:



814 M9 to M5 respectively is defined as HexNAc(2)Hex(9~5)Fuc(0~1); M1-M4 is defined as  
815 HexNAc(2)Hex(4~1)Fuc(0~1); Hybrid is defined as HexNAc(3~6)Hex(5~9)Fuc(0)NeuAc(0~1)  
816 and F-Hybrid is defined as HexNAc(3~6)Hex(5~9)Fuc(1~2)NeuAc(0~1). Complex-type glycans  
817 are classified based on the number of antenna and fucosylation:  
818 HexNAc(3)Hex(3~4)Fuc(0)NeuAc(0~1) is assigned as A1 with  
819 HexNAc(3)Hex(3~4)Fuc(1~2)NeuAc(0~1) assigned as F-A1;  
820 HexNAc(4)Hex(3~5)Fuc(0)NeuAc(0~2) biantennary is assigned as A2/A1B with  
821 HexNAc(4)Hex(3~5)Fuc(1~5)NeuAc(0~2) biantennary or hybrid with LacDiNAc assigned as F-  
822 A2/A1B; HexNAc(5)Hex(3~6)Fuc(0)NeuAc(0~3) bisected biantennary/triantennary is assigned  
823 as A3/A2B with HexNAc(5)Hex(3~6)Fuc(1~3)NeuAc(0~3) bisected biantennary/triantennary or  
824 biantennary with LacDiNAc assigned as F-A3/A2B; HexNAc(6)Hex(3~7)Fuc(0)NeuAc(0~4)  
825 tetraantennary or triantennary with LacDiNAc is assigned as A4/A3B with  
826 HexNAc(6)Hex(3~7)Fuc(1~3)NeuAc(0~4) biantennary with LacDiNAc or bisected  
827 biantennary/triantennary with LacDiNAc or tetraantennary assigned as F-A4/A3B;  
828 HexNAc(7)Hex(3~8)Fuc(0)NeuAc(0~1) triantennary with LacDiNAc is assigned as A5/A4B with  
829 HexNAc(7)Hex(3~8)Fuc(1~3)NeuAc(0~1) triantennary with LacDiNAc assigned as F-A5/A4B;  
830 HexNAc(8)Hex(3~9)Fuc(0) is assigned as A6/A5B with HexNAc(8)Hex(3~9)Fuc(1) assigned as  
831 F-A6/A5B.

832 **Supplemental Table Tab 9.** O-linked glycan compositions identified at each site of SARS-CoV-  
833 2 S and human ACE2. Ser/Thr# indicates the numbers of serines or threonines in protein  
834 sequences. In compositions: N=HexNAc, H=Hexose (Hex), F=Fucose (Fuc), and A=Neu5Ac.

835 **Supplemental Table Tab 10.** O-linked glycan occupancy at each site of SARS-CoV-2 S and  
836 human ACE2. Occupancy is calculated using spectral counts assigned to the glycosylated  
837 peptides and their unmodified counterparts.

838 **Supplemental Table Tab 11.** SARS-CoV-2 S and human ACE2 variants.

839 **Supplemental Figure 1.** Defining N-terminus of ACE2 as pyro-glutamine at site Q0018.  
840 Representative HCD MS2 spectrum shown.

841 **Supplemental Figure 2.** Disulfide bond formed between Cysteines 0015 and 0136 of SARS-  
842 CoV-2 S. Representative EThcD MS2 spectrum shown.

843 **Supplemental Figure 3.** Signal P Prediction of Two Different Start Methionines for S

844 **Supplemental Figure 4.** Functional characterization of various S constructs in Pseudovirus. A)  
845 Syncytia produced by SARS-CoV-2 S constructs in VeroE6 cells co-transfected with a GFP  
846 plasmid to visualize cell-to-cell fusion. Quantification of fusion using a luciferase  
847 complementation assay in 293T (B) or VeroE6 cells (C). D) Transduction efficiency in Vero E6  
848 cells of ppVSV-GFP particles coated in the indicated glycoprotein. Results suggest that start  
849 methionine does not alter fusion or efficiency.

850 **Supplemental Figure 5.** Detection of O-linked glycans released from SARS-CoV-2 S and  
851 human ACE2. The detected O-glycans were categorized based on their structures and types.  
852 Relative abundance (prevalence) of each species is calculated based on peak intensity in full  
853 MS.

854 **Supplemental Figure 6.** Multi-panel. N-linked glycan compositions identified at each site of  
855 SARS-CoV-2 S not displayed in Figure 2. The y-axis represents spectral counts of each  
856 identified composition and indicated structures in red numbering are displayed.

857 **Supplemental Figure 7.** N-linked glycan oxford classes identified at each of 22 glycosylation  
858 sites of SARS-CoV-2 S. Percentages are calculated based on spectral counts. All N-linked  
859 glycan compositions are categorized into 21 classes: M9 to M5 respectively is defined as  
860 HexNAc(2)Hex(9~5)Fuc(0~1); M1-M4 is defined as HexNAc(2)Hex(4~1)Fuc(0~1); Hybrid is  
861 defined as HexNAc(3~6)Hex(5~9)Fuc(0)NeuAc(0~1) and F-Hybrid is defined as  
862 HexNAc(3~6)Hex(5~9)Fuc(1~2)NeuAc(0~1). Complex-type glycans are classified based on the  
863 number of antenna and fucosylation: HexNAc(3)Hex(3~4)Fuc(0)NeuAc(0~1) is assigned as A1  
864 with HexNAc(3)Hex(3~4)Fuc(1~2)NeuAc(0~1) assigned as F-A1;

865 HexNAc(4)Hex(3~5)Fuc(0)NeuAc(0~2) biantennary is assigned as A2/A1B with  
866 HexNAc(4)Hex(3~5)Fuc(1~5)NeuAc(0~2) biantennary or hybrid with LacDiNAc assigned as F-  
867 A2/A1B; HexNAc(5)Hex(3~6)Fuc(0)NeuAc(0~3) bisected biantennary/triantennary is assigned  
868 as A3/A2B with HexNAc(5)Hex(3~6)Fuc(1~3)NeuAc(0~3) bisected biantennary/triantennary or  
869 biantennary with LacDiNAc assigned as F-A3/A2B; HexNAc(6)Hex(3~7)Fuc(0)NeuAc(0~4)  
870 tetraantennary or triantennary with LacDiNAc is assigned as A4/A3B with  
871 HexNAc(6)Hex(3~7)Fuc(1~3)NeuAc(0~4) biantennary with LacDiNAc or bisected  
872 biantennary/triantennary with LacDiNAc or tetraantennary assigned as F-A4/A3B;  
873 HexNAc(7)Hex(3~8)Fuc(0)NeuAc(0~1) triantennary with LacDiNAc is assigned as A5/A4B with  
874 HexNAc(7)Hex(3~8)Fuc(1~3)NeuAc(0~1) triantennary with LacDiNAc assigned as F-A5/A4B;  
875 HexNAc(8)Hex(3~9)Fuc(0) is assigned as A6/A5B with HexNAc(8)Hex(3~9)Fuc(1) assigned as  
876 F-A6/A5B.

877 **Supplemental Figure 8.** Multipanel. Legend and 6 O-linked glycans detected at site T0323 of  
878 SARS-CoV-2 S. Representative Step-HCD spectra shown for each.

879 **Supplemental Figure 9.** Two panel. Sequence alignments of SARS-CoV-1 and SARS-CoV-2 S  
880 variants. Alignment of multiple S proteins from related coronaviruses.

881 **Supplemental Figure 10.** N-linked glycan oxford classes identified at each site of human  
882 ACE2. Percentages are calculated based on spectral counts. All N-linked glycan compositions  
883 are categorized into 21 classes: M9 to M5 respectively is defined as  
884 HexNAc(2)Hex(9~5)Fuc(0~1); M1-M4 is defined as HexNAc(2)Hex(4~1)Fuc(0~1); Hybrid is  
885 defined as HexNAc(3~6)Hex(5~9)Fuc(0)NeuAc(0~1) and F-Hybrid is defined as  
886 HexNAc(3~6)Hex(5~9)Fuc(1~2)NeuAc(0~1). Complex-type glycans are classified based on the  
887 number of antenna and fucosylation: HexNAc(3)Hex(3~4)Fuc(0)NeuAc(0~1) is assigned as A1  
888 with HexNAc(3)Hex(3~4)Fuc(1~2)NeuAc(0~1) assigned as F-A1;  
889 HexNAc(4)Hex(3~5)Fuc(0)NeuAc(0~2) biantennary is assigned as A2/A1B with  
890 HexNAc(4)Hex(3~5)Fuc(1~5)NeuAc(0~2) biantennary or hybrid with LacDiNAc assigned as F-

891 A2/A1B; HexNAc(5)Hex(3~6)Fuc(0)NeuAc(0~3) bisected biantennary/triantennary is assigned  
892 as A3/A2B with HexNAc(5)Hex(3~6)Fuc(1~3)NeuAc(0~3) bisected biantennary/triantennary or  
893 biantennary with LacDiNAc assigned as F-A3/A2B; HexNAc(6)Hex(3~7)Fuc(0)NeuAc(0~4)  
894 tetraantennary or triantennary with LacDiNAc is assigned as A4/A3B with  
895 HexNAc(6)Hex(3~7)Fuc(1~3)NeuAc(0~4) biantennary with LacDiNAc or bisected  
896 biantennary/triantennary with LacDiNAc or tetraantennary assigned as F-A4/A3B;  
897 HexNAc(7)Hex(3~8)Fuc(0)NeuAc(0~1) triantennary with LacDiNAc is assigned as A5/A4B with  
898 HexNAc(7)Hex(3~8)Fuc(1~3)NeuAc(0~1) triantennary with LacDiNAc assigned as F-A5/A4B;  
899 HexNAc(8)Hex(3~9)Fuc(0) is assigned as A6/A5B with HexNAc(8)Hex(3~9)Fuc(1) assigned as  
900 F-A6/A5B.

901 **Supplemental Movie A:** Linked to Figure 4C, Glycosylated S antigen accessibility

902 **Supplemental Movie B:** Linked to Figure 6B, Glycosylated ACE2 with variants

903 **Supplemental Movie C:** Linked to Figure 7E, Interface of ACE2-S Complex

904 **Supplemental Movie D:** Linked to Figure 7F, the glycosylated ACE2-S Complex

905 **Simulation 1:** Linked to Figure 7B, Abundance glycoforms on ACE2-S Complex

906 **Simulation 2:** Linked to Figure 7B, Oxford class glycoforms on ACE2-S Complex

907 **Simulation 3:** Linked to Figure 7B, Processed glycoforms on ACE2-S Complex

## 908 REFERENCES

- 909
- 910 1. Zhou, P., Yang, X. L., Wang, X. G., Hu, B., Zhang, L., Zhang, W., Si, H. R., Zhu, Y., Li, B.,  
911 Huang, C. L., Chen, H. D., Chen, J., Luo, Y., Guo, H., Jiang, R. D., Liu, M. Q., Chen, Y., Shen,  
912 X. R., Wang, X., Zheng, X. S., Zhao, K., Chen, Q. J., Deng, F., Liu, L. L., Yan, B., Zhan, F. X.,  
913 Wang, Y. Y., Xiao, G. F., and Shi, Z. L. (2020) A pneumonia outbreak associated with a  
914 new coronavirus of probable bat origin. *Nature* **579**, 270-273
  - 915 2. Lu, R., Zhao, X., Li, J., Niu, P., Yang, B., Wu, H., Wang, W., Song, H., Huang, B., Zhu, N., Bi,  
916 Y., Ma, X., Zhan, F., Wang, L., Hu, T., Zhou, H., Hu, Z., Zhou, W., Zhao, L., Chen, J., Meng,  
917 Y., Wang, J., Lin, Y., Yuan, J., Xie, Z., Ma, J., Liu, W. J., Wang, D., Xu, W., Holmes, E. C.,  
918 Gao, G. F., Wu, G., Chen, W., Shi, W., and Tan, W. (2020) Genomic characterisation  
919 and epidemiology of 2019 novel coronavirus: implications for virus origins and  
920 receptor binding. *Lancet* **395**, 565-574

- 921 3. Zhong, N. S., Zheng, B. J., Li, Y. M., Poon, Xie, Z. H., Chan, K. H., Li, P. H., Tan, S. Y.,  
922 Chang, Q., Xie, J. P., Liu, X. Q., Xu, J., Li, D. X., Yuen, K. Y., Peiris, and Guan, Y. (2003)  
923 Epidemiology and cause of severe acute respiratory syndrome (SARS) in  
924 Guangdong, People's Republic of China, in February, 2003. *Lancet* **362**, 1353-1358
- 925 4. Xia, X. (2020) Extreme genomic CpG deficiency in SARS-CoV-2 and evasion of host  
926 antiviral defense. *Mol Biol Evol*
- 927 5. Zhang, T., Wu, Q., and Zhang, Z. (2020) Probable Pangolin Origin of SARS-CoV-2  
928 Associated with the COVID-19 Outbreak. *Curr Biol* **30**, 1346-1351 e1342
- 929 6. Alijotas-Reig, J., Esteve-Valverde, E., Belizna, C., Selva-O'Callaghan, A., Pardos-Gea, J.,  
930 Quintana, A., Mekinian, A., Anunciacion-Llunell, A., and Miro-Mur, F. (2020)  
931 Immunomodulatory therapy for the management of severe COVID-19. Beyond the  
932 anti-viral therapy: A comprehensive review. *Autoimmun Rev* **19**, 102569
- 933 7. Beigel, J. H., Tomashek, K. M., Dodd, L. E., Mehta, A. K., Zingman, B. S., Kalil, A. C.,  
934 Hohmann, E., Chu, H. Y., Luetkemeyer, A., Kline, S., Lopez de Castilla, D., Finberg, R.  
935 W., Dierberg, K., Tapsen, V., Hsieh, L., Patterson, T. F., Paredes, R., Sweeney, D. A.,  
936 Short, W. R., Touloumi, G., Lye, D. C., Ohmagari, N., Oh, M. D., Ruiz-Palacios, G. M.,  
937 Benfield, T., Fatkenheuer, G., Kortepeter, M. G., Atmar, R. L., Creech, C. B., Lundgren,  
938 J., Babiker, A. G., Pett, S., Neaton, J. D., Burgess, T. H., Bonnett, T., Green, M.,  
939 Makowski, M., Osinusi, A., Nayak, S., Lane, H. C., and Members, A.-S. G. (2020)  
940 Remdesivir for the Treatment of Covid-19 - Preliminary Report. *N Engl J Med*
- 941 8. Beun, R., Kusadasi, N., Sikma, M., Westerink, J., and Huisman, A. (2020)  
942 Thromboembolic events and apparent heparin resistance in patients infected with  
943 SARS-CoV-2. *Int J Lab Hematol* **42 Suppl 1**, 19-20
- 944 9. Dashti-Khavidaki, S., and Khalili, H. (2020) Considerations for Statin Therapy in  
945 Patients with COVID-19. *Pharmacotherapy* **40**, 484-486
- 946 10. Fedson, D. S., Opal, S. M., and Rordam, O. M. (2020) Hiding in Plain Sight: an  
947 Approach to Treating Patients with Severe COVID-19 Infection. *mBio* **11**
- 948 11. Shi, Q., Zhou, Q., Wang, X., Liao, J., Yu, Y., Wang, Z., Lu, S., Ma, Y., Xun, Y., Luo, X., Li, W.,  
949 Fukuoka, T., Ahn, H. S., Lee, M. S., Luo, Z., Liu, E., Chen, Y., Li, Q., Yang, K., Guan, Q.,  
950 Evidence, C.-., and Recommendations Working, G. (2020) Potential effectiveness and  
951 safety of antiviral agents in children with coronavirus disease 2019: a rapid review  
952 and meta-analysis. *Ann Transl Med* **8**, 624
- 953 12. Tang, N., Bai, H., Chen, X., Gong, J., Li, D., and Sun, Z. (2020) Anticoagulant treatment  
954 is associated with decreased mortality in severe coronavirus disease 2019 patients  
955 with coagulopathy. *J Thromb Haemost* **18**, 1094-1099
- 956 13. Hoffmann, M., Kleine-Weber, H., Schroeder, S., Kruger, N., Herrler, T., Erichsen, S.,  
957 Schiergens, T. S., Herrler, G., Wu, N. H., Nitsche, A., Muller, M. A., Drosten, C., and  
958 Pohlmann, S. (2020) SARS-CoV-2 Cell Entry Depends on ACE2 and TMPRSS2 and Is  
959 Blocked by a Clinically Proven Protease Inhibitor. *Cell* **181**, 271-280 e278
- 960 14. Li, W., Moore, M. J., Vasilieva, N., Sui, J., Wong, S. K., Berne, M. A., Somasundaran, M.,  
961 Sullivan, J. L., Luzuriaga, K., Greenough, T. C., Choe, H., and Farzan, M. (2003)  
962 Angiotensin-converting enzyme 2 is a functional receptor for the SARS coronavirus.  
963 *Nature* **426**, 450-454
- 964 15. Watanabe, Y., Bowden, T. A., Wilson, I. A., and Crispin, M. (2019) Exploitation of  
965 glycosylation in enveloped virus pathobiology. *Biochim Biophys Acta Gen Subj* **1863**,  
966 1480-1497

- 967 16. Li, F. (2016) Structure, Function, and Evolution of Coronavirus Spike Proteins. *Annu*  
968 *Rev Virol* **3**, 237-261
- 969 17. Lei, C., Qian, K., Li, T., Zhang, S., Fu, W., Ding, M., and Hu, S. (2020) Neutralization of  
970 SARS-CoV-2 spike pseudotyped virus by recombinant ACE2-Ig. *Nat Commun* **11**,  
971 2070
- 972 18. Monteil, V., Kwon, H., Prado, P., Hagelkruys, A., Wimmer, R. A., Stahl, M., Leopoldi, A.,  
973 Garreta, E., Hurtado Del Pozo, C., Prosper, F., Romero, J. P., Wirnsberger, G., Zhang,  
974 H., Slutsky, A. S., Conder, R., Montserrat, N., Mirazimi, A., and Penninger, J. M. (2020)  
975 Inhibition of SARS-CoV-2 Infections in Engineered Human Tissues Using Clinical-  
976 Grade Soluble Human ACE2. *Cell* **181**, 905-913 e907
- 977 19. Watanabe, Y., Allen, J. D., Wrapp, D., McLellan, J. S., and Crispin, M. (2020) Site-  
978 specific glycan analysis of the SARS-CoV-2 spike. *Science*
- 979 20. Watanabe, Y., Berndsen, Z. T., Raghwani, J., Seabright, G. E., Allen, J. D., Pybus, O. G.,  
980 McLellan, J. S., Wilson, I. A., Bowden, T. A., Ward, A. B., and Crispin, M. (2020)  
981 Vulnerabilities in coronavirus glycan shields despite extensive glycosylation. *Nat*  
982 *Commun* **11**, 2688
- 983 21. Stertz, S., Reichelt, M., Spiegel, M., Kuri, T., Martinez-Sobrido, L., Garcia-Sastre, A.,  
984 Weber, F., and Kochs, G. (2007) The intracellular sites of early replication and  
985 budding of SARS-coronavirus. *Virology* **361**, 304-315
- 986 22. Ujike, M., and Taguchi, F. (2015) Incorporation of spike and membrane  
987 glycoproteins into coronavirus virions. *Viruses* **7**, 1700-1725
- 988 23. Duan, H., Chen, X., Boyington, J. C., Cheng, C., Zhang, Y., Jafari, A. J., Stephens, T.,  
989 Tsybovsky, Y., Kalyuzhniy, O., Zhao, P., Menis, S., Nason, M. C., Normandin, E.,  
990 Mukhamedova, M., DeKosky, B. J., Wells, L., Schief, W. R., Tian, M., Alt, F. W., Kwong,  
991 P. D., and Mascola, J. R. (2018) Glycan Masking Focuses Immune Responses to the  
992 HIV-1 CD4-Binding Site and Enhances Elicitation of VRC01-Class Precursor  
993 Antibodies. *Immunity* **49**, 301-311 e305
- 994 24. Escolano, A., Gristick, H. B., Abernathy, M. E., Merckenschlager, J., Gautam, R., Oliveira,  
995 T. Y., Pai, J., West, A. P., Jr., Barnes, C. O., Cohen, A. A., Wang, H., Golijanin, J., Yost, D.,  
996 Keeffe, J. R., Wang, Z., Zhao, P., Yao, K. H., Bauer, J., Nogueira, L., Gao, H., Voll, A. V.,  
997 Montefiori, D. C., Seaman, M. S., Gazumyan, A., Silva, M., McGuire, A. T., Stamatatos, L.,  
998 Irvine, D. J., Wells, L., Martin, M. A., Bjorkman, P. J., and Nussenzweig, M. C. (2019)  
999 Immunization expands B cells specific to HIV-1 V3 glycan in mice and macaques.  
1000 *Nature* **570**, 468-473
- 1001 25. Seabright, G. E., Cottrell, C. A., van Gils, M. J., D'Addabbo, A., Harvey, D. J., Behrens, A.  
1002 J., Allen, J. D., Watanabe, Y., Scaringi, N., Polveroni, T. M., Maker, A., Vasiljevic, S., de  
1003 Val, N., Sanders, R. W., Ward, A. B., and Crispin, M. (2020) Networks of HIV-1  
1004 Envelope Glycans Maintain Antibody Epitopes in the Face of Glycan Additions and  
1005 Deletions. *Structure*
- 1006 26. Yu, W. H., Zhao, P., Draghi, M., Arevalo, C., Karsten, C. B., Suscovich, T. J., Gunn, B.,  
1007 Streeck, H., Brass, A. L., Tiemeyer, M., Seaman, M., Mascola, J. R., Wells, L.,  
1008 Lauffenburger, D. A., and Alter, G. (2018) Exploiting glycan topography for  
1009 computational design of Env glycoprotein antigenicity. *PLoS Comput Biol* **14**,  
1010 e1006093

- 1011 27. Tikellis, C., Bernardi, S., and Burns, W. C. (2011) Angiotensin-converting enzyme 2 is  
1012 a key modulator of the renin-angiotensin system in cardiovascular and renal  
1013 disease. *Curr Opin Nephrol Hypertens* **20**, 62-68
- 1014 28. Lambert, D. W., Yarski, M., Warner, F. J., Thornhill, P., Parkin, E. T., Smith, A. I.,  
1015 Hooper, N. M., and Turner, A. J. (2005) Tumor necrosis factor-alpha convertase  
1016 (ADAM17) mediates regulated ectodomain shedding of the severe-acute respiratory  
1017 syndrome-coronavirus (SARS-CoV) receptor, angiotensin-converting enzyme-2  
1018 (ACE2). *J Biol Chem* **280**, 30113-30119
- 1019 29. Epelman, S., Shrestha, K., Troughton, R. W., Francis, G. S., Sen, S., Klein, A. L., and  
1020 Tang, W. H. (2009) Soluble angiotensin-converting enzyme 2 in human heart failure:  
1021 relation with myocardial function and clinical outcomes. *J Card Fail* **15**, 565-571
- 1022 30. Li, W., Zhang, C., Sui, J., Kuhn, J. H., Moore, M. J., Luo, S., Wong, S. K., Huang, I. C., Xu, K.,  
1023 Vasilieva, N., Murakami, A., He, Y., Marasco, W. A., Guan, Y., Choe, H., and Farzan, M.  
1024 (2005) Receptor and viral determinants of SARS-coronavirus adaptation to human  
1025 ACE2. *EMBO J* **24**, 1634-1643
- 1026 31. Marth, J. D., and Grewal, P. K. (2008) Mammalian glycosylation in immunity. *Nat Rev*  
1027 *Immunol* **8**, 874-887
- 1028 32. Varki, A. (2017) Biological roles of glycans. *Glycobiology* **27**, 3-49
- 1029 33. Yu, J., Tostanoski, L. H., Peter, L., Mercado, N. B., McMahan, K., Mahrokhian, S. H.,  
1030 Nkolola, J. P., Liu, J., Li, Z., Chandrashekar, A., Martinez, D. R., Loos, C., Atyeo, C.,  
1031 Fischinger, S., Burke, J. S., Slein, M. D., Chen, Y., Zuiani, A., FJ, N. L., Travers, M., Habibi,  
1032 S., Pessaint, L., Van Ry, A., Blade, K., Brown, R., Cook, A., Finneyfrock, B., Dodson, A.,  
1033 Teow, E., Velasco, J., Zahn, R., Wegmann, F., Bondzie, E. A., Dagotto, G., Gebre, M. S.,  
1034 He, X., Jacob-Dolan, C., Kirilova, M., Kordana, N., Lin, Z., Maxfield, L. F., Nampanya, F.,  
1035 Nityanandam, R., Ventura, J. D., Wan, H., Cai, Y., Chen, B., Schmidt, A. G., Wesemann,  
1036 D. R., Baric, R. S., Alter, G., Andersen, H., Lewis, M. G., and Barouch, D. H. (2020) DNA  
1037 vaccine protection against SARS-CoV-2 in rhesus macaques. *Science*
- 1038 34. Almagro Armenteros, J. J., Tsirigos, K. D., Sonderby, C. K., Petersen, T. N., Winther, O.,  
1039 Brunak, S., von Heijne, G., and Nielsen, H. (2019) SignalP 5.0 improves signal peptide  
1040 predictions using deep neural networks. *Nat Biotechnol* **37**, 420-423
- 1041 35. Aoki, K., Perlman, M., Lim, J. M., Cantu, R., Wells, L., and Tiemeyer, M. (2007)  
1042 Dynamic developmental elaboration of N-linked glycan complexity in the *Drosophila*  
1043 *melanogaster* embryo. *J Biol Chem* **282**, 9127-9142
- 1044 36. Aoki, K., Porterfield, M., Lee, S. S., Dong, B., Nguyen, K., McGlamry, K. H., and  
1045 Tiemeyer, M. (2008) The diversity of O-linked glycans expressed during *Drosophila*  
1046 *melanogaster* development reflects stage- and tissue-specific requirements for cell  
1047 signaling. *J Biol Chem* **283**, 30385-30400
- 1048 37. Weatherly, D. B., Arpinar, F. S., Porterfield, M., Tiemeyer, M., York, W. S., and  
1049 Ranzinger, R. (2019) GRITS Toolbox-a freely available software for processing,  
1050 annotating and archiving glycomics mass spectrometry data. *Glycobiology* **29**, 452-  
1051 460
- 1052 38. Wang, S., Voronin, Y., Zhao, P., Ishihara, M., Mehta, N., Porterfield, M., Chen, Y.,  
1053 Bartley, C., Hu, G., Han, D., Wells, L., Tiemeyer, M., and Lu, S. (2020) Glycan Profiles of  
1054 gp120 Protein Vaccines from Four Major HIV-1 Subtypes Produced from Different  
1055 Host Cell Lines under Non-GMP or GMP Conditions. *J Virol* **94**

- 1056 39. Ruiz-Canada, C., Kelleher, D. J., and Gilmore, R. (2009) Cotranslational and  
1057 posttranslational N-glycosylation of polypeptides by distinct mammalian OST  
1058 isoforms. *Cell* **136**, 272-283
- 1059 40. Zielinska, D. F., Gnad, F., Wisniewski, J. R., and Mann, M. (2010) Precision mapping of  
1060 an in vivo N-glycoproteome reveals rigid topological and sequence constraints. *Cell*  
1061 **141**, 897-907
- 1062 41. Palmisano, G., Melo-Braga, M. N., Engholm-Keller, K., Parker, B. L., and Larsen, M. R.  
1063 (2012) Chemical deamidation: a common pitfall in large-scale N-linked  
1064 glycoproteomic mass spectrometry-based analyses. *J Proteome Res* **11**, 1949-1957
- 1065 42. Zhou, T., Doria-Rose, N. A., Cheng, C., Stewart-Jones, G. B. E., Chuang, G. Y., Chambers,  
1066 M., Druz, A., Geng, H., McKee, K., Kwon, Y. D., O'Dell, S., Sastry, M., Schmidt, S. D., Xu,  
1067 K., Chen, L., Chen, R. E., Louder, M. K., Pancera, M., Wanninger, T. G., Zhang, B., Zheng,  
1068 A., Farney, S. K., Foulds, K. E., Georgiev, I. S., Joyce, M. G., Lemmin, T., Narpala, S.,  
1069 Rawi, R., Soto, C., Todd, J. P., Shen, C. H., Tsybovsky, Y., Yang, Y., Zhao, P., Haynes, B. F.,  
1070 Stamatas, L., Tiemeyer, M., Wells, L., Scorpio, D. G., Shapiro, L., McDermott, A. B.,  
1071 Mascola, J. R., and Kwong, P. D. (2017) Quantification of the Impact of the HIV-1-  
1072 Glycan Shield on Antibody Elicitation. *Cell Rep* **19**, 719-732
- 1073 43. Liu, M. Q., Zeng, W. F., Fang, P., Cao, W. Q., Liu, C., Yan, G. Q., Zhang, Y., Peng, C., Wu, J.  
1074 Q., Zhang, X. J., Tu, H. J., Chi, H., Sun, R. X., Cao, Y., Dong, M. Q., Jiang, B. Y., Huang, J. M.,  
1075 Shen, H. L., Wong, C. C. L., He, S. M., and Yang, P. Y. (2017) pGlyco 2.0 enables  
1076 precision N-glycoproteomics with comprehensive quality control and one-step mass  
1077 spectrometry for intact glycopeptide identification. *Nat Commun* **8**, 438
- 1078 44. Bern, M., Kil, Y. J., and Becker, C. (2012) Byonic: advanced peptide and protein  
1079 identification software. *Curr Protoc Bioinformatics* **Chapter 13**, Unit13 20
- 1080 45. Shajahan, A., Supekar, N. T., Gleinich, A. S., and Azadi, P. (2020) Deducing the N- and  
1081 O- glycosylation profile of the spike protein of novel coronavirus SARS-CoV-2.  
1082 *Glycobiology*
- 1083 46. Wrapp, D., Wang, N., Corbett, K. S., Goldsmith, J. A., Hsieh, C. L., Abiona, O., Graham, B.  
1084 S., and McLellan, J. S. (2020) Cryo-EM structure of the 2019-nCoV spike in the  
1085 prefusion conformation. *Science* **367**, 1260-1263
- 1086 47. Ferreira, R. C., Grant, O. C., Moyo, T., Dorfman, J. R., Woods, R. J., Travers, S. A., and  
1087 Wood, N. T. (2018) Structural Rearrangements Maintain the Glycan Shield of an HIV-  
1088 1 Envelope Trimer After the Loss of a Glycan. *Sci Rep* **8**, 15031
- 1089 48. Lan, J., Ge, J., Yu, J., Shan, S., Zhou, H., Fan, S., Zhang, Q., Shi, X., Wang, Q., Zhang, L., and  
1090 Wang, X. (2020) Structure of the SARS-CoV-2 spike receptor-binding domain bound  
1091 to the ACE2 receptor. *Nature* **581**, 215-220
- 1092 49. Kristic, J., Vuckovic, F., Menni, C., Klaric, L., Keser, T., Beceheli, I., Pucic-Bakovic, M.,  
1093 Novokmet, M., Mangino, M., Thaqi, K., Rudan, P., Novokmet, N., Sarac, J., Missoni, S.,  
1094 Kolcic, I., Polasek, O., Rudan, I., Campbell, H., Hayward, C., Aulchenko, Y., Valdes, A.,  
1095 Wilson, J. F., Gornik, O., Primorac, D., Zoldos, V., Spector, T., and Lauc, G. (2014)  
1096 Glycans are a novel biomarker of chronological and biological ages. *J Gerontol A Biol*  
1097 *Sci Med Sci* **69**, 779-789
- 1098 50. Pavic, T., Dilber, D., Kifer, D., Selak, N., Keser, T., Ljubicic, D., Vukic Dugac, A., Lauc, G.,  
1099 Rumora, L., and Gornik, O. (2018) N-glycosylation patterns of plasma proteins and  
1100 immunoglobulin G in chronic obstructive pulmonary disease. *J Transl Med* **16**, 323



- 1101 51. Rudman, N., Gornik, O., and Lauc, G. (2019) Altered N-glycosylation profiles as  
1102 potential biomarkers and drug targets in diabetes. *FEBS Lett* **593**, 1598-1615
- 1103 52. Gebrehiwot, A. G., Melka, D. S., Kassaye, Y. M., Rehan, I. F., Rangappa, S., Hinou, H.,  
1104 Kamiyama, T., and Nishimura, S. I. (2018) Healthy human serum N-glycan profiling  
1105 reveals the influence of ethnic variation on the identified cancer-relevant glycan  
1106 biomarkers. *PLoS One* **13**, e0209515
- 1107 53. Thieker, D. F., Hadden, J. A., Schulten, K., and Woods, R. J. (2016) 3D implementation  
1108 of the symbol nomenclature for graphical representation of glycans. *Glycobiology*  
1109 **26**, 786-787
- 1110 54. Rice, P., Longden, I., and Bleasby, A. (2000) EMBOS: the European Molecular  
1111 Biology Open Software Suite. *Trends Genet* **16**, 276-277
- 1112 55. Shaik, M. M., Peng, H., Lu, J., Rits-Volloch, S., Xu, C., Liao, M., and Chen, B. (2019)  
1113 Structural basis of coreceptor recognition by HIV-1 envelope spike. *Nature* **565**,  
1114 318-323
- 1115 56. Anumula, K. R., and Taylor, P. B. (1992) A comprehensive procedure for preparation  
1116 of partially methylated alditol acetates from glycoprotein carbohydrates. *Anal*  
1117 *Biochem* **203**, 101-108
- 1118 57. Varki, A., Cummings, R. D., Aebi, M., Packer, N. H., Seeberger, P. H., Esko, J. D., Stanley,  
1119 P., Hart, G., Darvill, A., Kinoshita, T., Prestegard, J. J., Schnaar, R. L., Freeze, H. H.,  
1120 Marth, J. D., Bertozzi, C. R., Etzler, M. E., Frank, M., Vliegenthart, J. F., Lutteke, T.,  
1121 Perez, S., Bolton, E., Rudd, P., Paulson, J., Kanehisa, M., Toukach, P., Aoki-Kinoshita, K.  
1122 F., Dell, A., Narimatsu, H., York, W., Taniguchi, N., and Kornfeld, S. (2015) Symbol  
1123 Nomenclature for Graphical Representations of Glycans. *Glycobiology* **25**, 1323-1324
- 1124 58. Wells, L., Hart, G. W., and Athens Guidelines for the Publication of Glycomics, D.  
1125 (2013) Glycomics: building upon proteomics to advance glycosciences. *Mol Cell*  
1126 *Proteomics* **12**, 833-835
- 1127 59. Madeira, F., Madhusoodanan, N., Lee, J., Tivey, A. R. N., and Lopez, R. (2019) Using  
1128 EMBL-EBI Services via Web Interface and Programmatically via Web Services. *Curr*  
1129 *Protoc Bioinformatics* **66**, e74
- 1130 60. Nivedha, A. K., Makeneni, S., Foley, B. L., Tessier, M. B., and Woods, R. J. (2014)  
1131 Importance of ligand conformational energies in carbohydrate docking: Sorting the  
1132 wheat from the chaff. *J Comput Chem* **35**, 526-539
- 1133 61. Grant, O. C., Xue, X., Ra, D., Khatamian, A., Foley, B. L., and Woods, R. J. (2016) Gly-  
1134 Spec: a webtool for predicting glycan specificity by integrating glycan array  
1135 screening data and 3D structure. *Glycobiology* **26**, 1027-1028
- 1136 62. Peng, W., de Vries, R. P., Grant, O. C., Thompson, A. J., McBride, R., Tsogtbaatar, B.,  
1137 Lee, P. S., Razi, N., Wilson, I. A., Woods, R. J., and Paulson, J. C. (2017) Recent H3N2  
1138 Viruses Have Evolved Specificity for Extended, Branched Human-type Receptors,  
1139 Conferring Potential for Increased Avidity. *Cell Host Microbe* **21**, 23-34
- 1140 63. Gotz, A. W., Williamson, M. J., Xu, D., Poole, D., Le Grand, S., and Walker, R. C. (2012)  
1141 Routine Microsecond Molecular Dynamics Simulations with AMBER on GPUs. 1.  
1142 Generalized Born. *J Chem Theory Comput* **8**, 1542-1555
- 1143 64. Salomon-Ferrer, R., Gotz, A. W., Poole, D., Le Grand, S., and Walker, R. C. (2013)  
1144 Routine Microsecond Molecular Dynamics Simulations with AMBER on GPUs. 2.  
1145 Explicit Solvent Particle Mesh Ewald. *J Chem Theory Comput* **9**, 3878-3888

- 1146 65. Kirschner, K. N., Yongye, A. B., Tschampel, S. M., Gonzalez-Outeirino, J., Daniels, C. R.,  
1147 Foley, B. L., and Woods, R. J. (2008) GLYCAM06: a generalizable biomolecular force  
1148 field. *Carbohydrates. J Comput Chem* **29**, 622-655
- 1149 66. Maier, J. A., Martinez, C., Kasavajhala, K., Wickstrom, L., Hauser, K. E., and  
1150 Simmerling, C. (2015) ff14SB: Improving the Accuracy of Protein Side Chain and  
1151 Backbone Parameters from ff99SB. *J Chem Theory Comput* **11**, 3696-3713
- 1152 67. Darden, T. A., and Pedersen, L. G. (1993) Molecular modeling: an experimental tool.  
1153 *Environ Health Perspect* **101**, 410-412
- 1154 68. Brindley, M. A., Chaudhury, S., and Plemper, R. K. (2015) Measles virus glycoprotein  
1155 complexes preassemble intracellularly and relax during transport to the cell surface  
1156 in preparation for fusion. *J Virol* **89**, 1230-1241
- 1157 69. Paal, M., Heel, T., Schneider, R., and Auer, B. (2009) A novel Ecotin-Ubiquitin-Tag  
1158 (ECUT) for efficient, soluble peptide production in the periplasm of *Escherichia coli*.  
1159 *Microb Cell Fact* **8**, 7
- 1160 70. Brindley, M. A., and Plemper, R. K. (2010) Blue native PAGE and biomolecular  
1161 complementation reveal a tetrameric or higher-order oligomer organization of the  
1162 physiological measles virus attachment protein H. *J Virol* **84**, 12174-12184
- 1163

### SARS-CoV-2 S Trimer Immunogen

|                                                    |                     |                     |                     |                     |             |
|----------------------------------------------------|---------------------|---------------------|---------------------|---------------------|-------------|
| <del>MFVFLVLLPL</del> VSS <b>Q</b> CV <b>N</b> LTT | RTQLPPAYTN          | SFTRGVYYPD          | KVFRSSVLHS          | TQDLFLPFFS          | <b>60</b>   |
| <b>N</b> VTFWFAIHV                                 | SGT <b>N</b> GTKRFD | NPVLPFNDGV          | YFASTEKSNI          | IRGWIFGTTL          | <b>120</b>  |
| <b>N</b> NATNVVIVK                                 | CEFQFCNDPF          | LGVYYHK <b>N</b> NK | SWMESEFRVY          | SSAN <b>N</b> CTFEY | <b>180</b>  |
| GKQGNFKNLR                                         | EFVFKNIDGY          | FKIYSKHTPI          | NLVRDLPQGF          | SALEPLVDLP          | <b>240</b>  |
| LLALHRSYLT                                         | PGDSSSGWTA          | GAAAYVGYL           | QPRTFLLKYN          | <b>E</b> NGTITDAVD  | <b>300</b>  |
| CTLKSFTVEK                                         | GIYQTSNFRV          | QPTESIVRFP          | <b>N</b> ITNLCPFGE  | VF <b>N</b> ATRFASV | <b>360</b>  |
| CVADYSVLYN                                         | SASFSTFKCY          | GVSPTKLNDL          | CFTNVYADSF          | VIRGDEVQRQI         | <b>420</b>  |
| YNYKLPDDFT                                         | GCVIAWNSNN          | LDSKVGGNYN          | YLYRFLRKS           | LKPFERDIST          | <b>480</b>  |
| NGVEGFNCYF                                         | PLQSYGFQPT          | NGVGYQPYRV          | VVLSFELLHA          | PATVCGPKKS          | <b>540</b>  |
| FNFNGLTGTG                                         | VLTESNKKFL          | PFQQFGRDIA          | DTTDAVRDPQ          | TLEILDITPC          | <b>600</b>  |
| GT <b>N</b> TSNQVAV                                | LYQDV <b>N</b> CTEV | PVAIHADQLT          | PTWRVYSTGS          | NVFQTRAGCL          | <b>660</b>  |
| ECDIPIGAGI                                         | CASYQTQTN           | PGGSGSVASQ          | SIIAYTMSLG          | AENSVAYS <b>N</b> N | <b>720</b>  |
| SVTTEILPVS                                         | MTKTSVDCTM          | YICGDSTEC           | NLLLQYGSFC          | TQLNRALTGI          | <b>780</b>  |
| VFAQVKQIYK                                         | TPPIKDFGGF          | <b>N</b> FSQILPDPS  | KPSKRSFIED          | LLFNKVTLAD          | <b>840</b>  |
| LGDIAARDLI                                         | CAQKFNGLTV          | LPPLLTDEMI          | AQYTSALLAG          | TITSGWTFGA          | <b>900</b>  |
| QMAYRFNGIG                                         | VTQNVLYENQ          | KLIANQFNSA          | IGKIQDSLSS          | TASALGKLQD          | <b>960</b>  |
| TLVKQLSSNF                                         | GAISSVLNDI          | LSRLDPPEAE          | VQIDRLITGR          | LQSLQTYVTQ          | <b>1020</b> |
| SANLAATKMS                                         | ECVLGQSKRV          | DFCGKGYHLM          | SFPQSAPHGV          | VFLHVTYVPA          | <b>1080</b> |
| ICHDGKAHFP                                         | REGVFS <b>N</b> GT  | HWFVTQRNFY          | EPQIITDNT           | FVSGNCDVVI          | <b>1140</b> |
| LQPELDSFKE                                         | ELDKYFK <b>N</b> HT | SPDVDLGDIS          | GI <b>N</b> ASVVNIQ | KEIDRLNEVA          | <b>1200</b> |
| QELGKYEQGS                                         | <i>GGYIPEAPRD</i>   | <i>GQAYVRKDGE</i>   | <i>WVLLSTFLGG</i>   | <i>SHHHHHH</i>      | <b>1247</b> |

### Soluble Human ACE2

|                                           |                   |                     |            |                     |            |
|-------------------------------------------|-------------------|---------------------|------------|---------------------|------------|
| <del>MSSSSWLLLS</del> LVAVTAA <b>Q</b> ST | IEEQAKTFLD        | KFNHEAEDLF          | YQSSLASWNY | NT <b>N</b> ITEENVQ | <b>60</b>  |
| NMNNAGDKWS                                | AFLKEQSTLA        | QMYPLQEI <b>Q</b> N | LTVKLQLQAL | QQ <b>N</b> GSSVLSE | <b>120</b> |
| NTMSTIYSTG                                | KVCNPDNPQE        | CLLLEPGLNE          | IMANSLDYNE | RLWAWESWRS          | <b>180</b> |
| EEYVVLKNEM                                | ARANHYEDYG        | DYWRGDYEVN          | GVDGYDYSRG | QLIEDVEHTF          | <b>240</b> |
| HAYVRAKLMN                                | AYPSYISPIG        | CLPAHLLGDM          | WGRFWTNLYS | LTVPFQKPN           | <b>300</b> |
| AWDAQRIFKE                                | AEKFFVSVGL        | <b>P</b> NMTQGFEN   | SMLTDPGNVQ | KAVCHPTAWD          | <b>360</b> |
| CTKVTMDDFL                                | TAHHEMGHIQ        | YDMAYAAQPF          | LLRNGANEGF | HEAVGEIMSL          | <b>420</b> |
| IGLLSPDFQE                                | <b>D</b> NETEINFL | KQALTIVGTL          | PFTYMLEKWR | WMVFKGEIPK          | <b>480</b> |
| KREIVGVVEP                                | VPHDETYCDP        | ASLFHVSNDY          | SFIRYYTRTL | YQFQFQEALC          | <b>540</b> |
| KCDIS <b>N</b> STE                        | GQKLFNMLRL        | GKSEPWTAL           | ENVVGAKNMN | VRPLLNYFEP          | <b>600</b> |
| NSFVGWSTDW                                | <i>SPYADSGGSH</i> | <i>HHHHH</i>        |            |                     | <b>625</b> |

**Q** = Pyroglutamate, Mature N-terminus      **N** = Canonical N-Glycosylation Sequon Asparagine      *Italics* = "Tag"  
**Strikethrough** = Signal Peptide

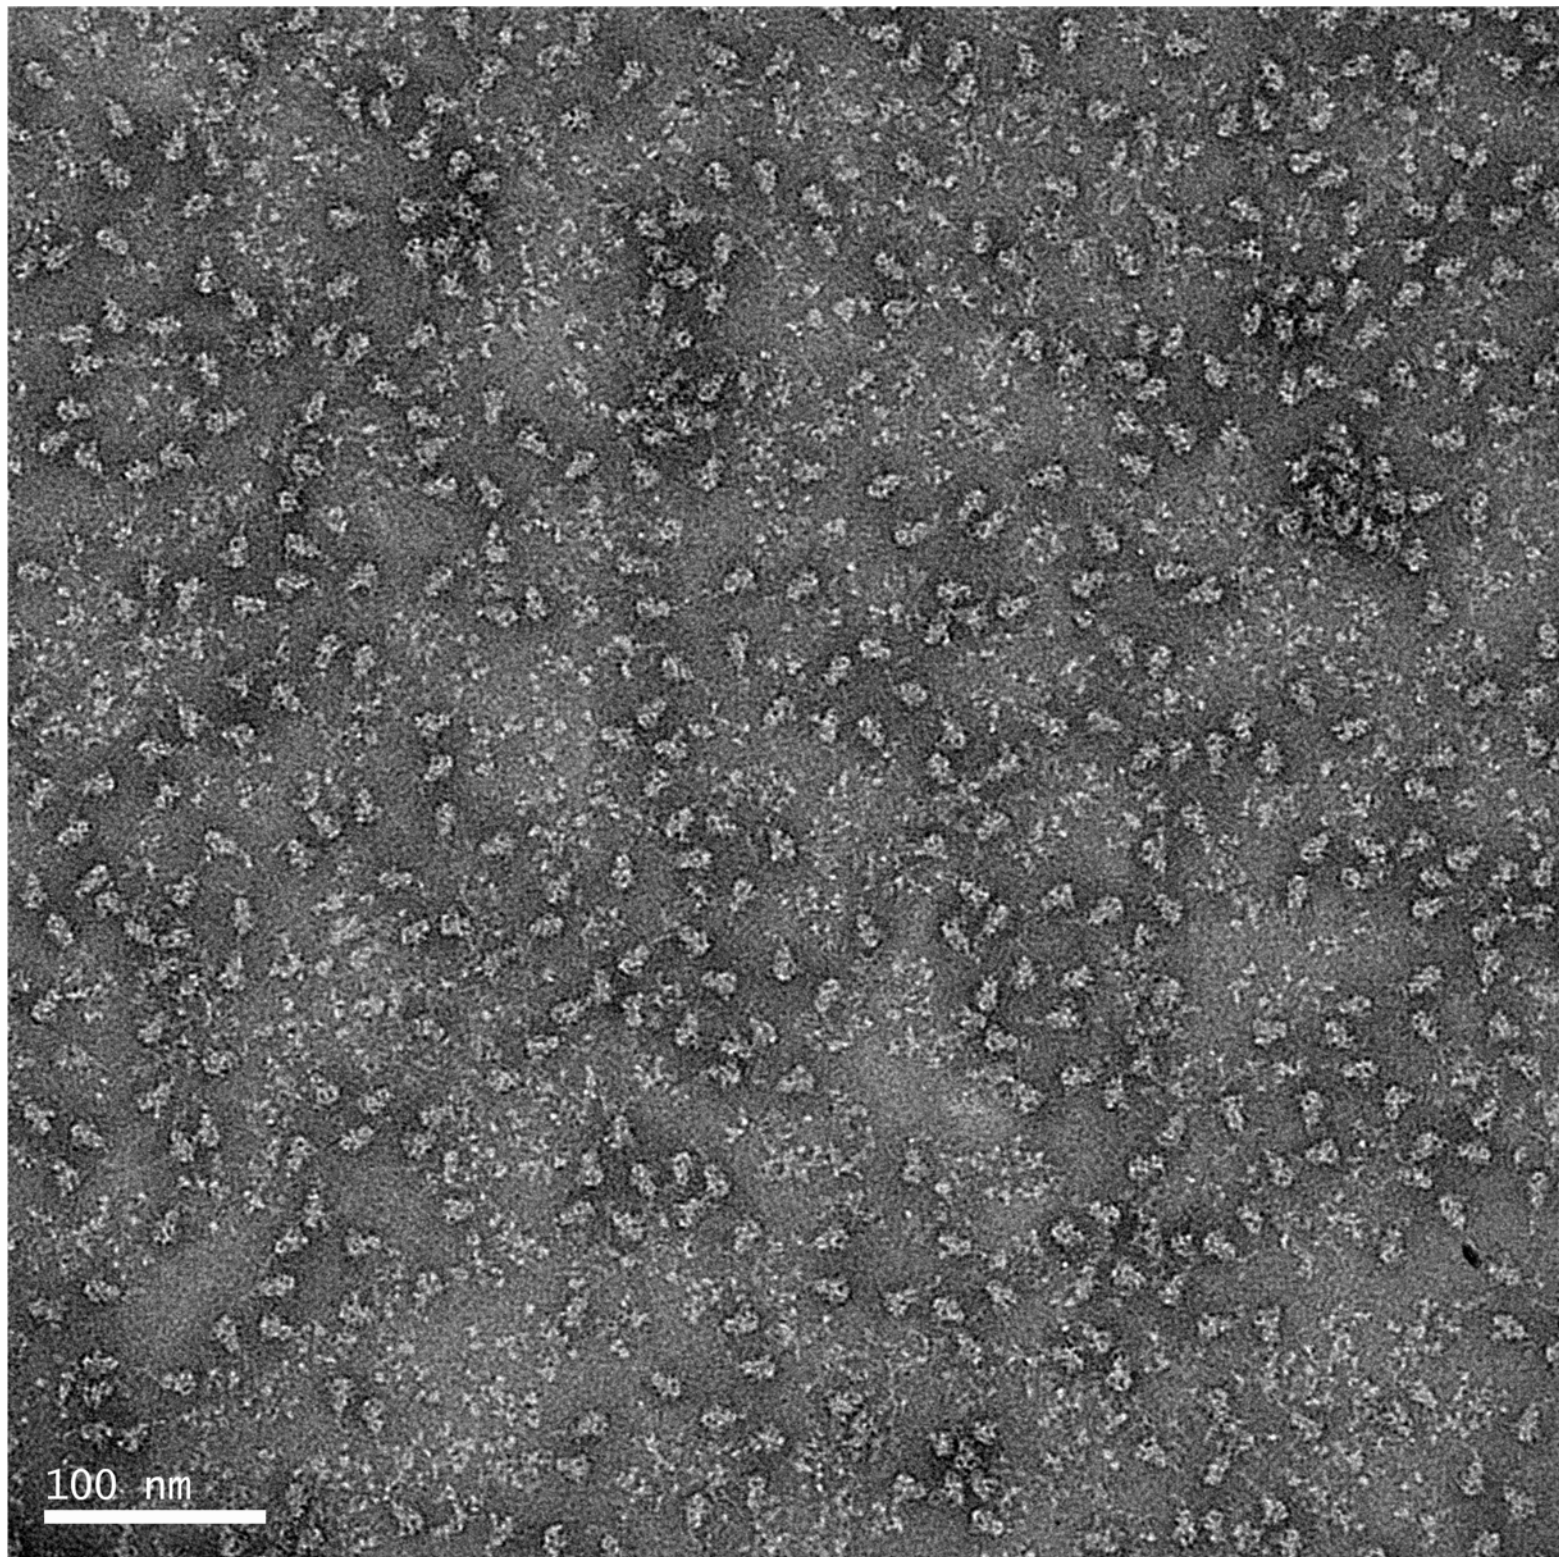

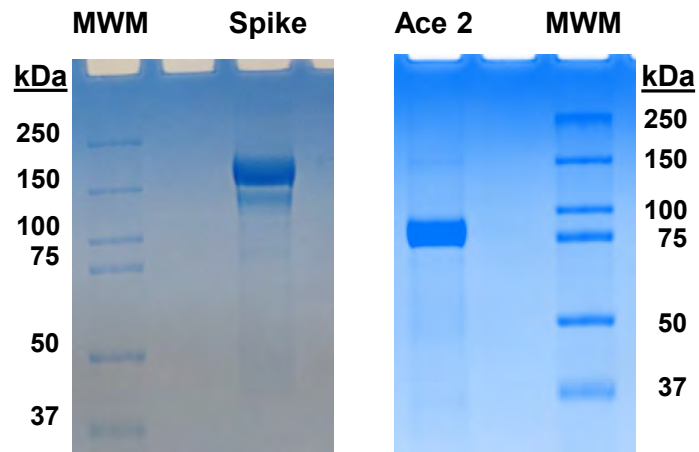

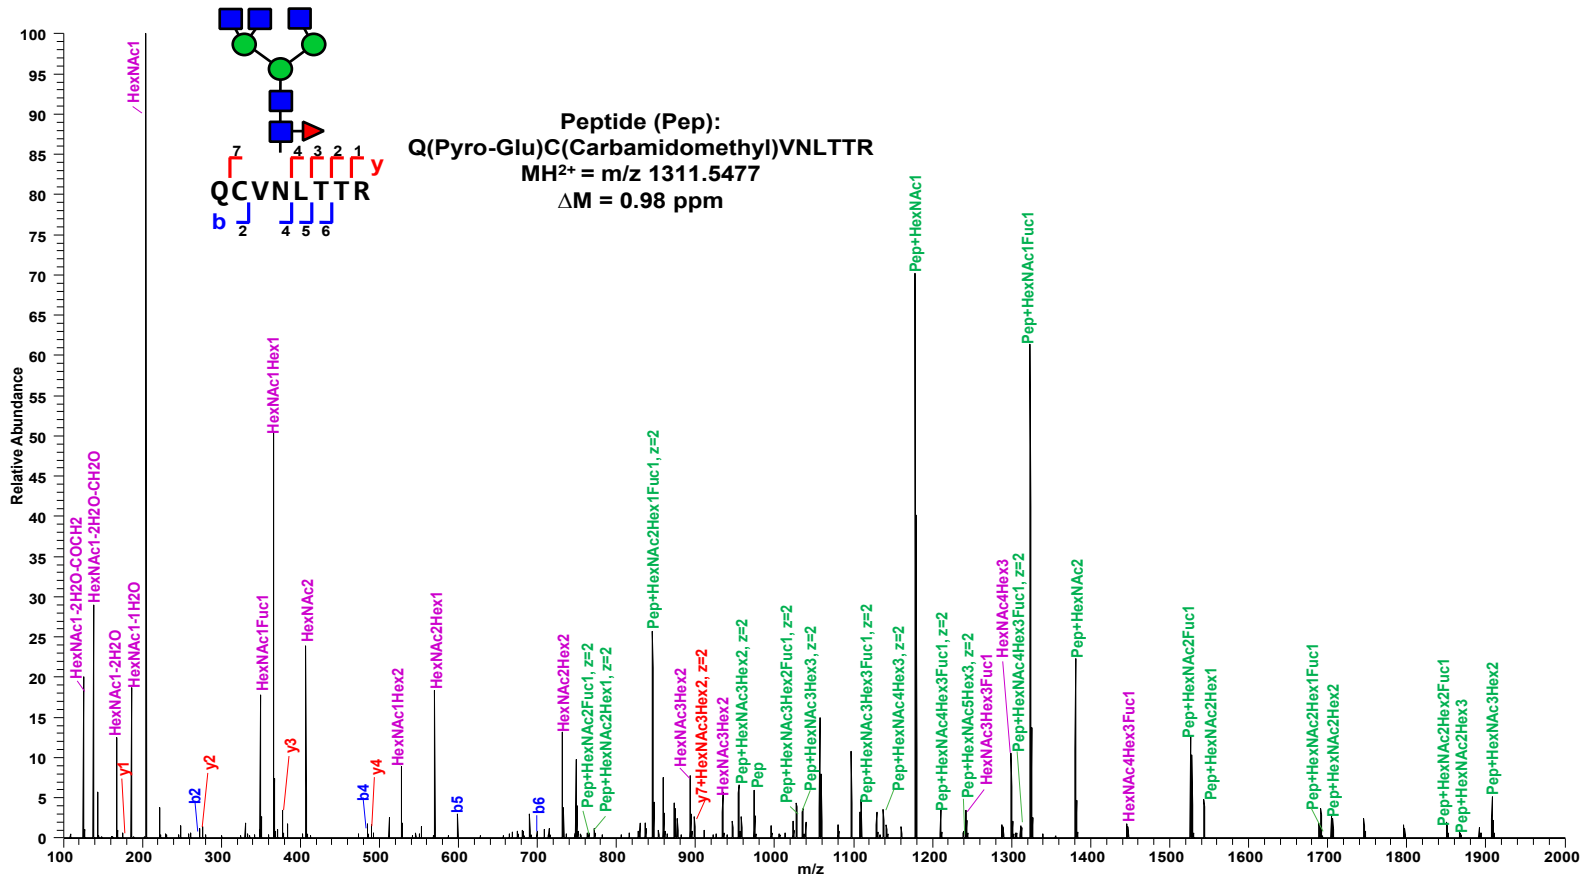

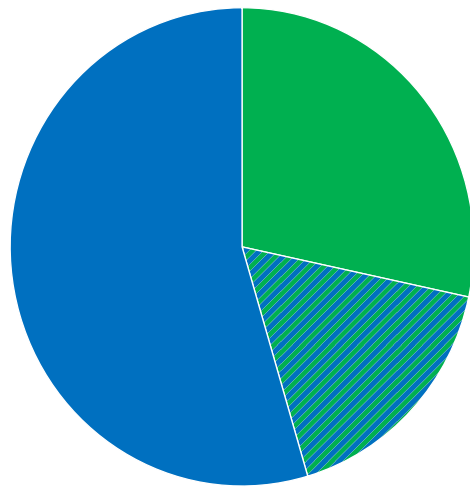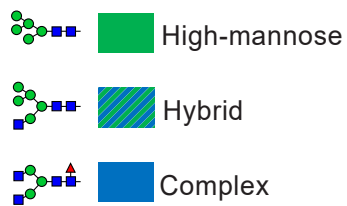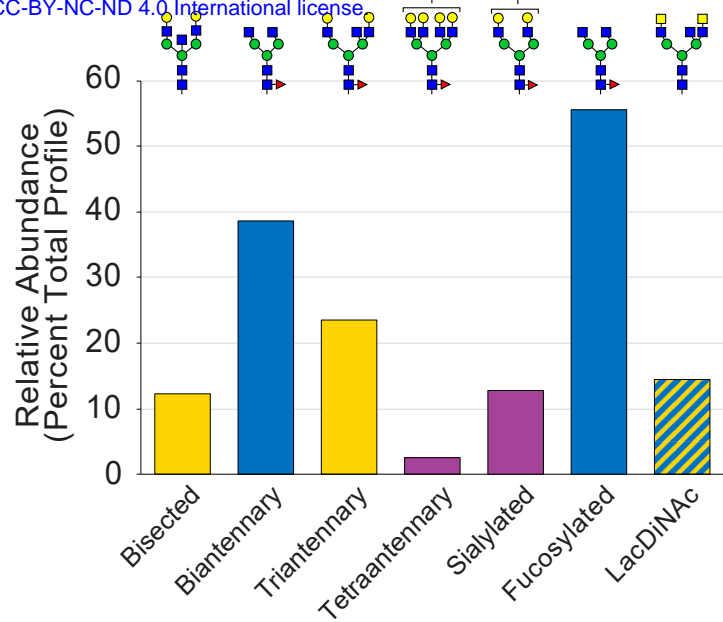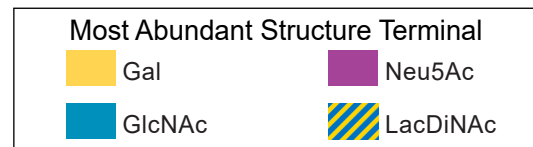

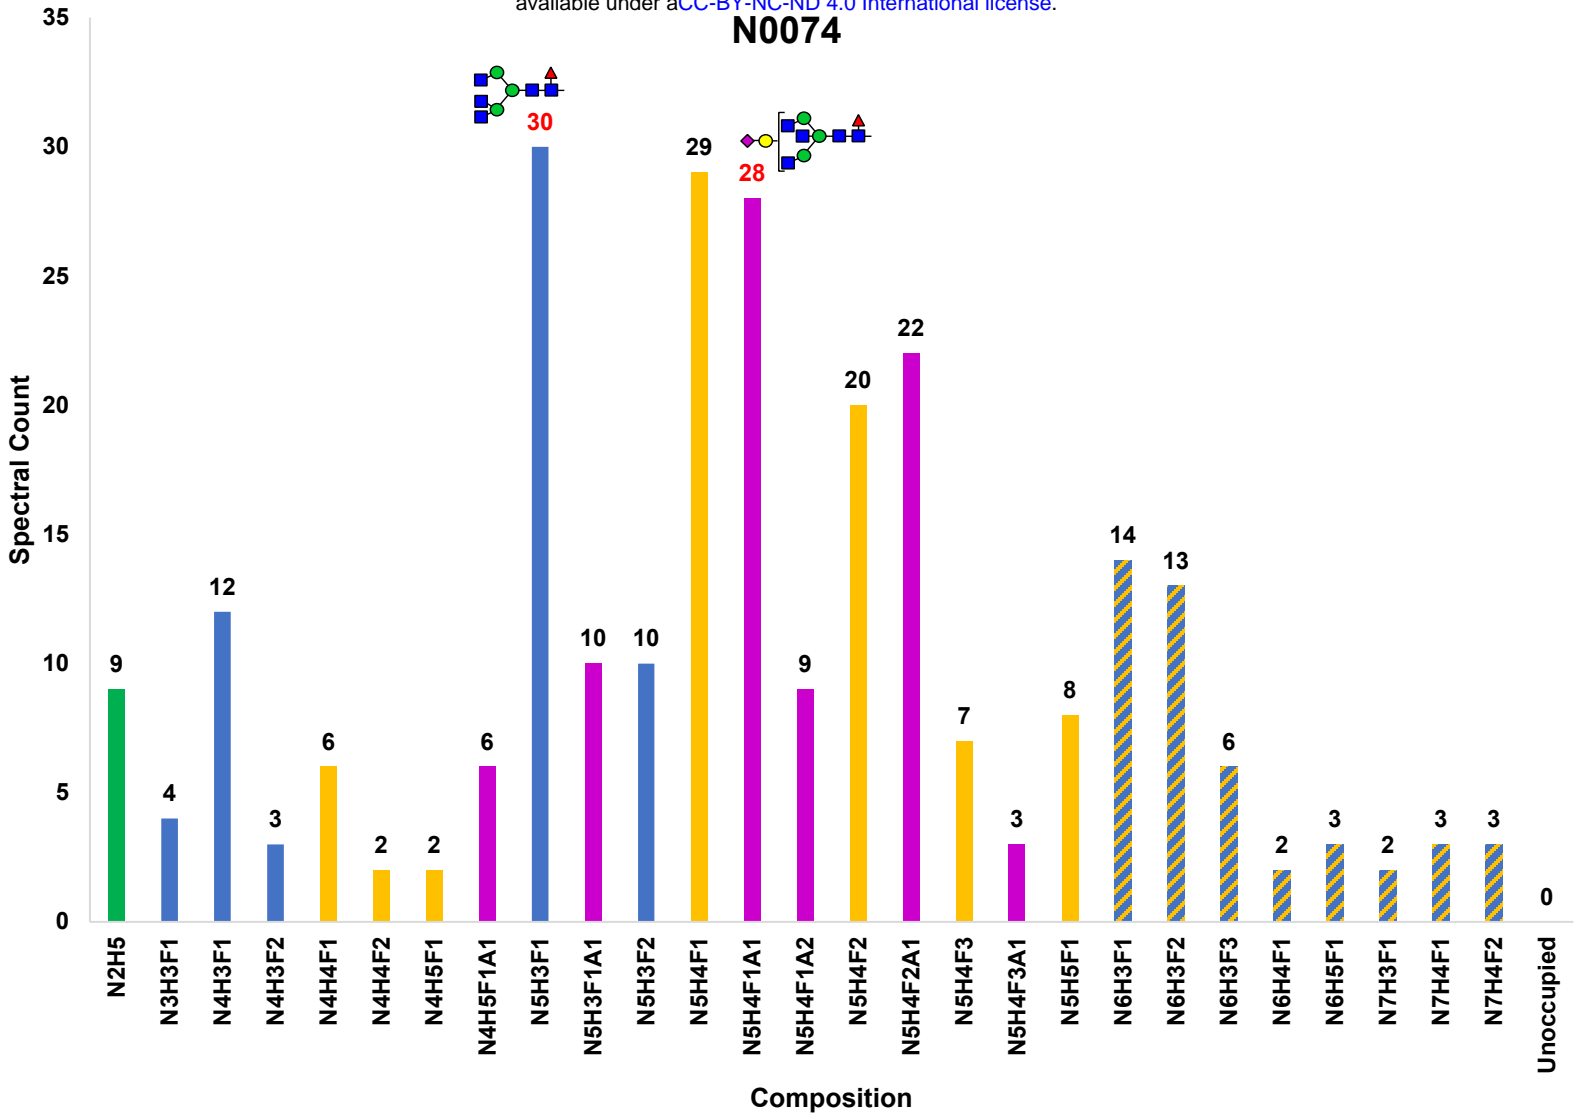



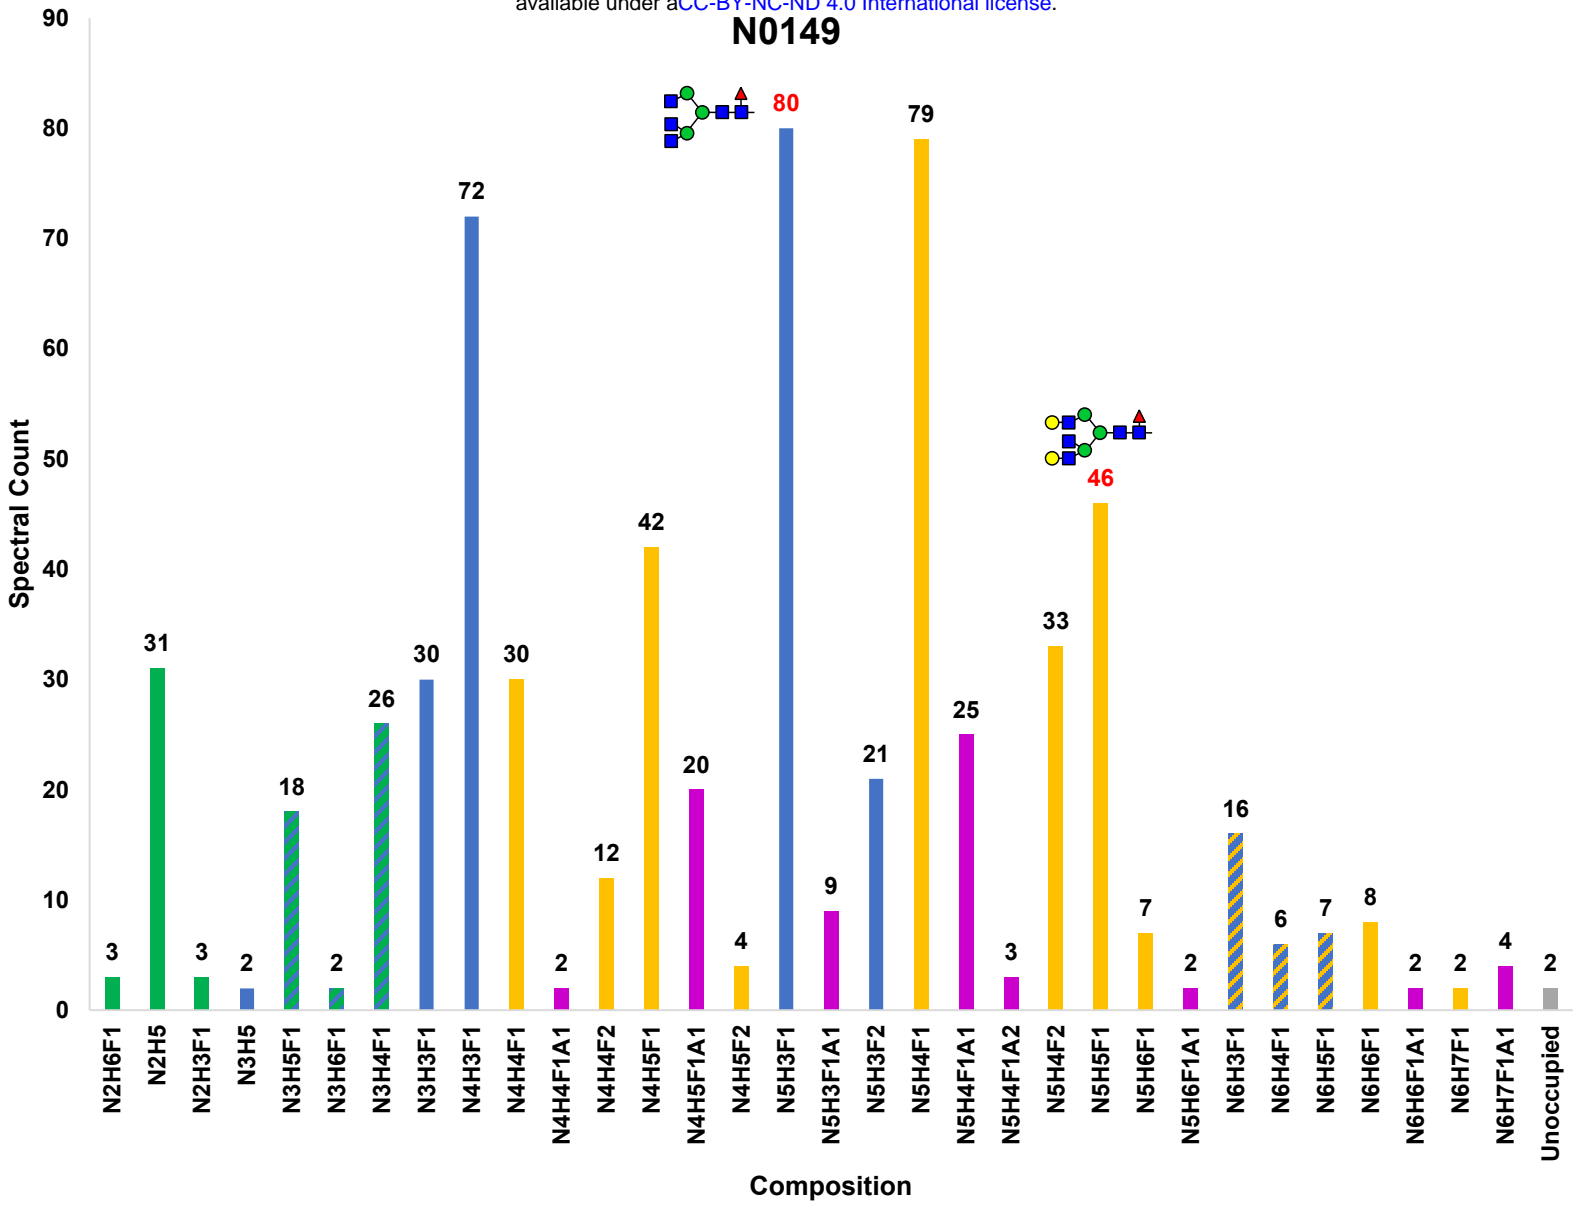

# N0234

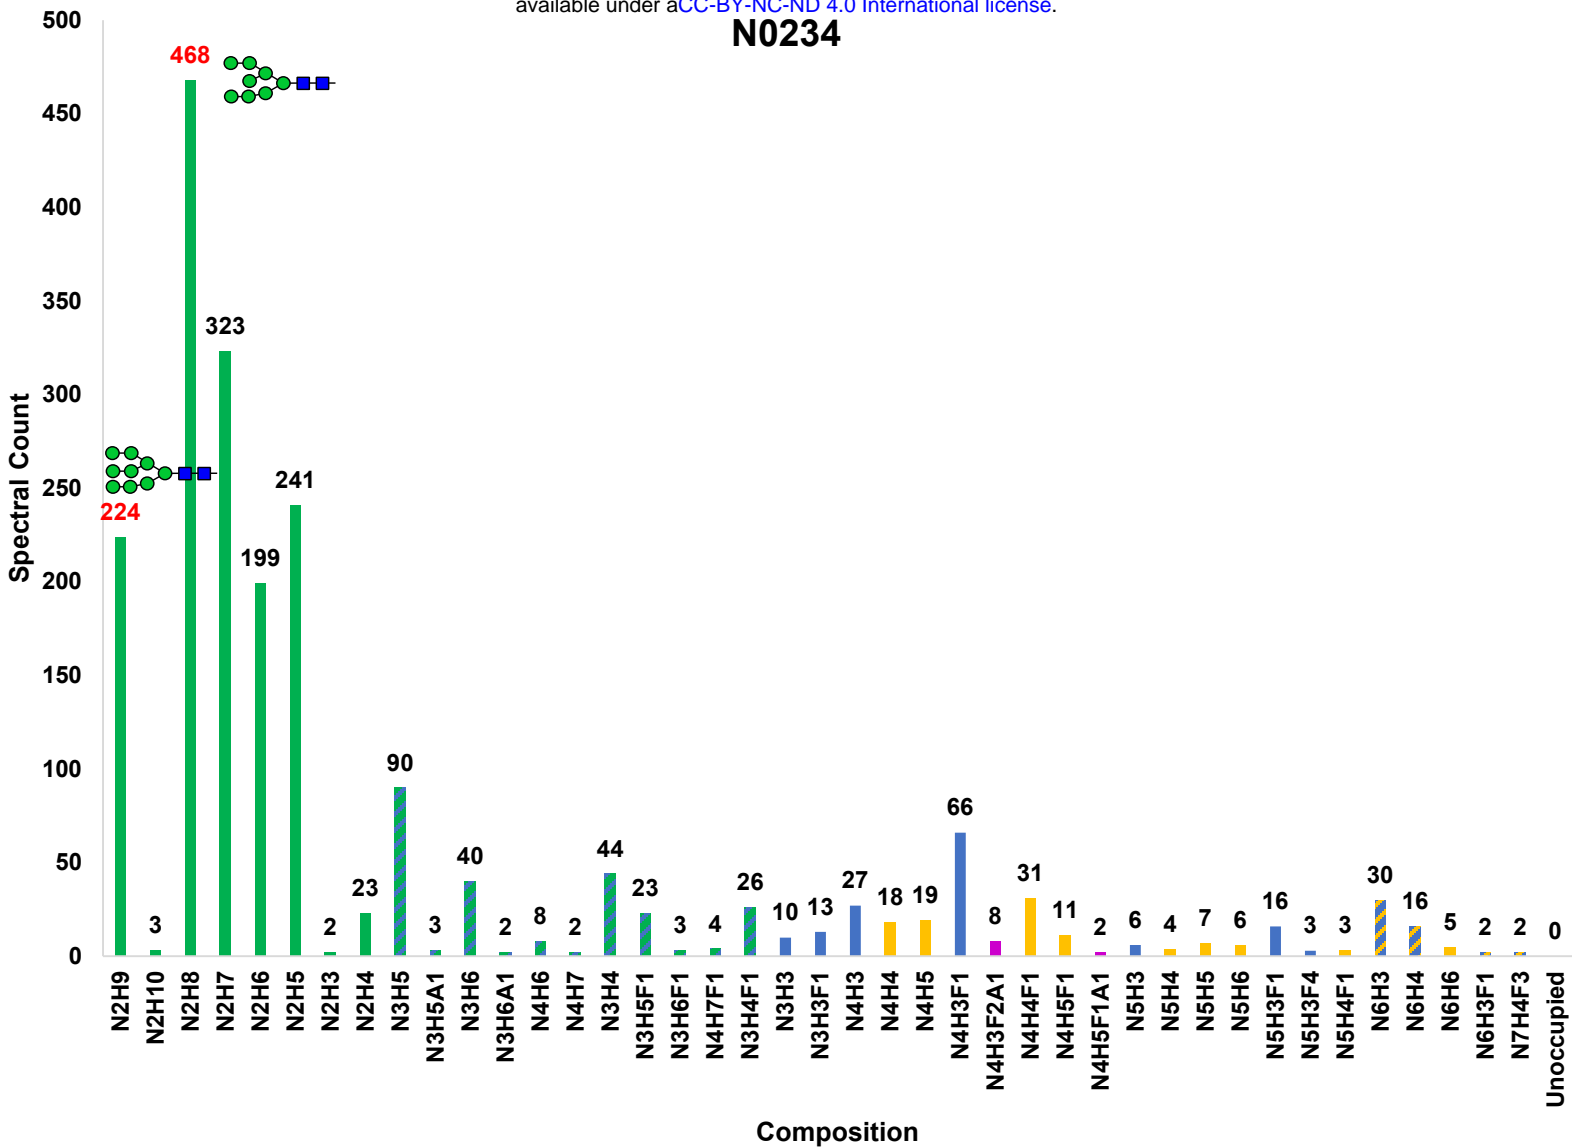

# N0801

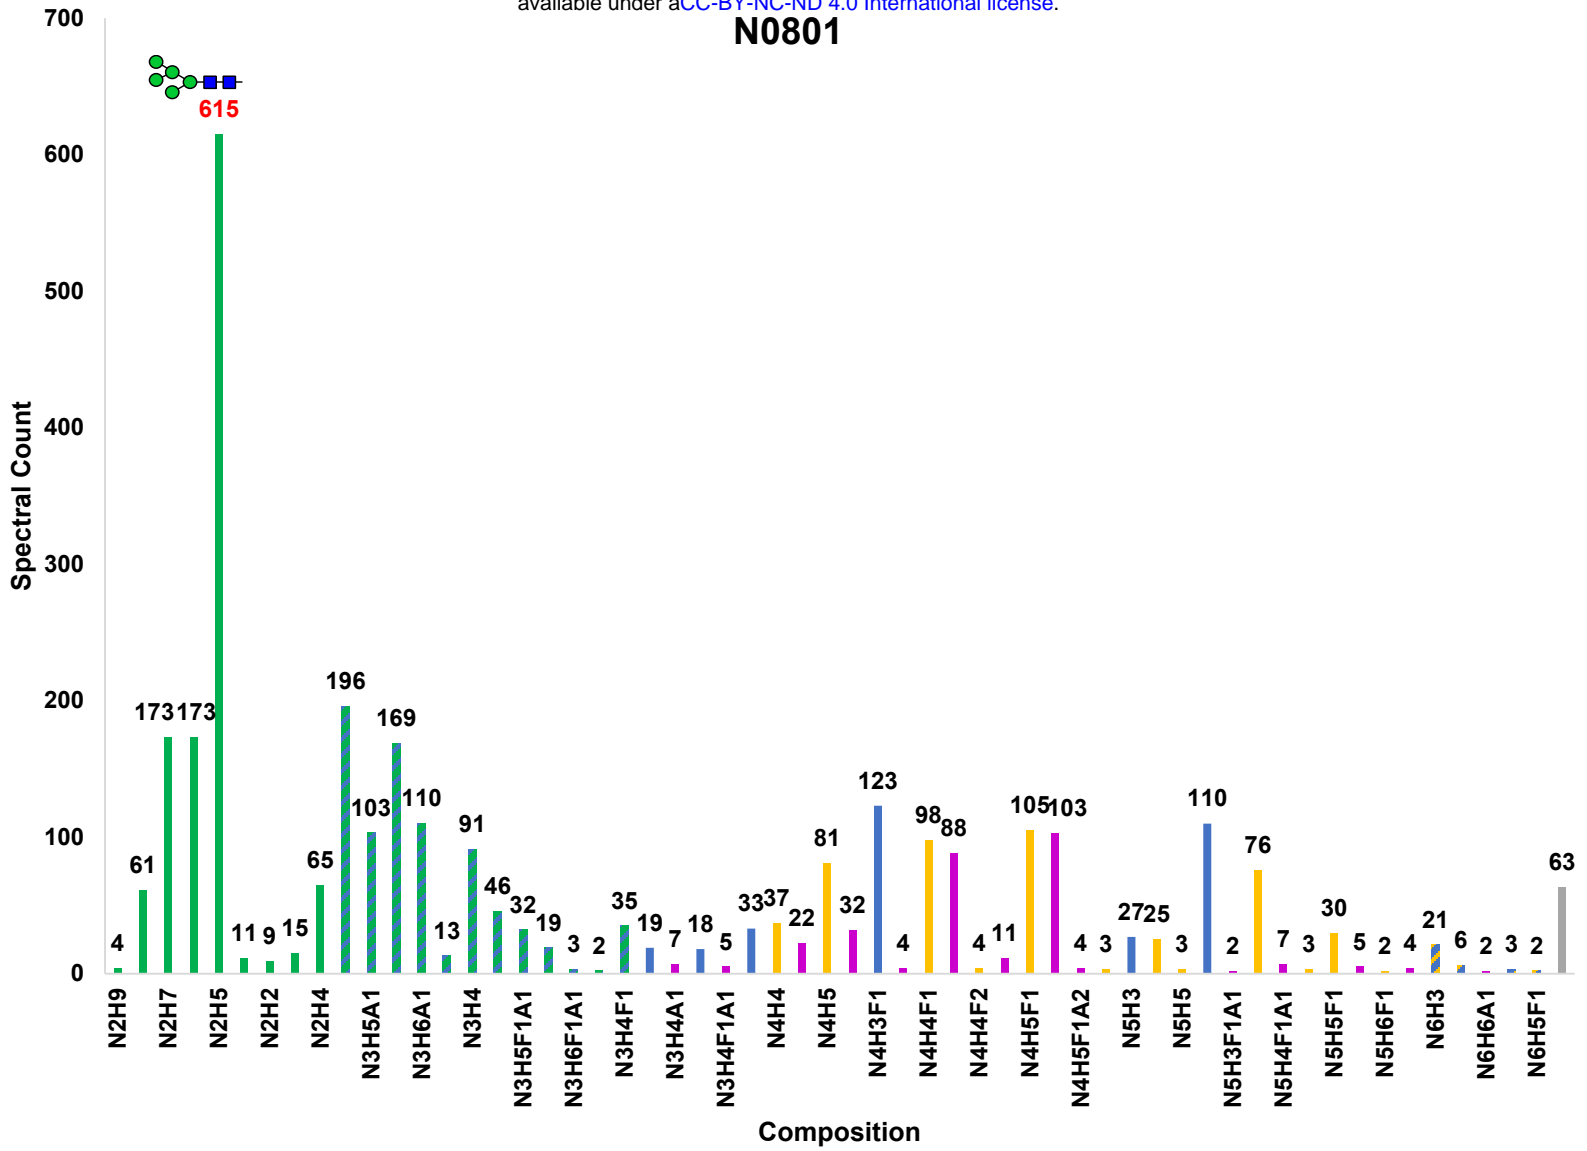

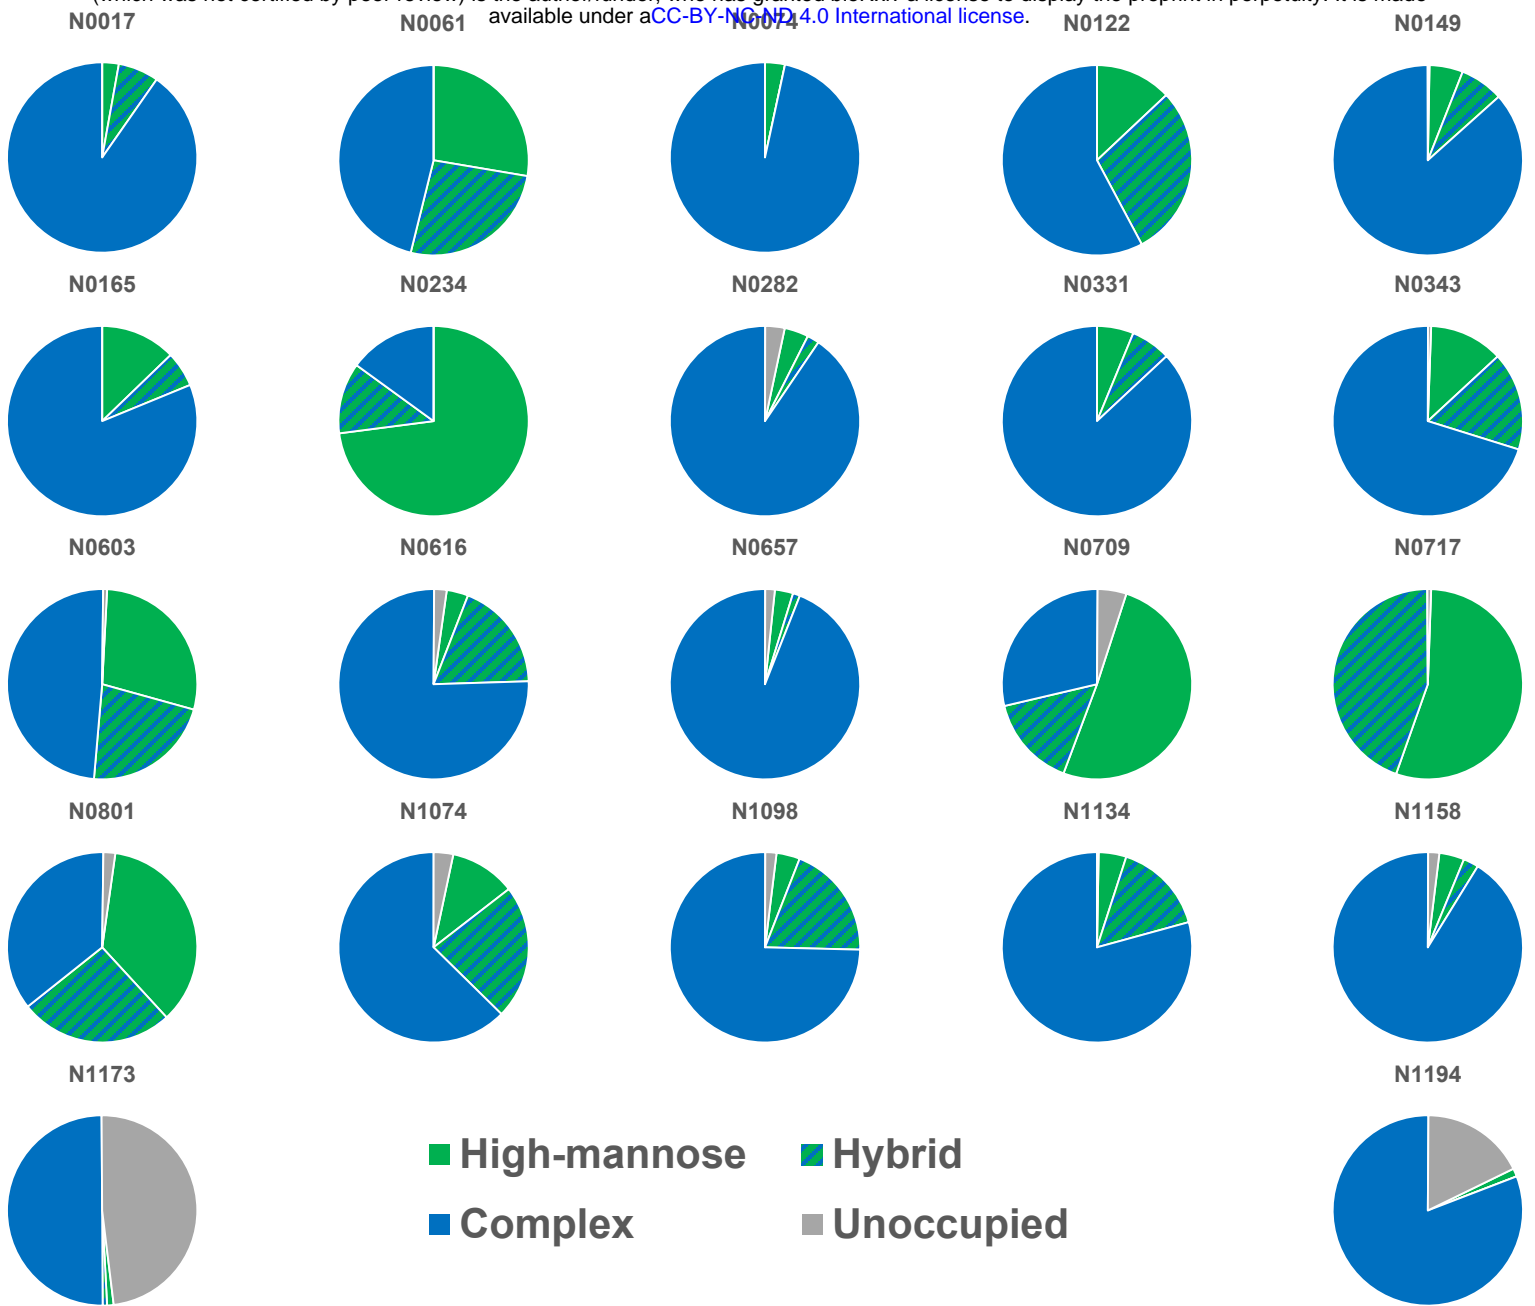

MFVFLVLLPL VSSQCVNLT RTQLPPAYT SFTRGVYYPD KVFRSSVLHS TQDLFLPFFS 60  
 F

VTWFHAIHV SGT GTRKFD PVLPF DGV YFASTEKS I IRGWIFGTL DSKTQSLIV 120  
 K I M

AT VVIKV CEFQFC DPF LGVYYHK K SWMESEFRVY SSA CTFEY VSQPLMDLE 180  
 H Y I

GKQG FK LR Efvfknidgy FKIYSKHTPI LVRDLPGGF SALEPLVDLP IGI ITRFQT 240  
 NTD

LLALHRSYLT PGDSSSGWTA GAAAYVGYL QPRTFLLKY E GTITDAVD CALDPLSETK 300  
 G

CTLKSFTVEK GIYQTSNFRV QPTESIVRFP IT LCPFGE VF ATRFASV YAW RKRIS 360

CVADYSVLY SASFSTFKCY GVSPTKL DL CFTNVYADSF VIRGDEVQI APGQTGKIAD 420  
 RBD

YNYKLPDDFT GCVIAW S L DSKVGG Y YLYRLFRKS LKPFERDIST EIYQAGSTPC 480  
 RBM

GVEGF CYF PLQSYGFQPT GVGYPYRV VVLSFELLHA PATVCGPKKS T LVK KCV 540  
 A

FNF GLTGTG VLTES KKF L PFQQFGRDIA DTTDAVRDPQ TLEILDITPC SFGGVSVITP 600  
 I

GT TS QVAV LYQDV CTEV PVAIHADQLT PTWRVYSTGS VFQTRAGCL IGAEHV SY 660  
 G Y

ECDIPIGAGI CASYQTQT S PGGSGSVASQ SIIAYTMSLG AE SVAYS SIAIPT FTI 720  
 L

SVTTEILPVS MTKTSVDCTM YICGDSTEC S LLLQYGSFC TQLNRALTGI AVEQDKNTQE 780

VFAQVKQIYK TPPIKDFGGF NFSQILPDPS KPSKRSFIED LLF KVTLAD AGFIKQYGDC 840  
 I T

LGDIAARDLI CAQKFNGLTV LPPLLTDEMI AQYTSALLAG TITSGWTFGA GAALQIPFAM 900  
 S

QMAYRFNGIG VTQNVLYE Q KLI A QF SA IGKIQDSLSS TASALGKLQD VVNQAQALN 960  
 HR1 F

TLVKQLSS F GAISSVL DI LSRLDPPEAE VQIDRLITGR LQSLQTYVTQ QLIRAAEIRA 1020

SANLAATKMS ECVLGQSKRV DFCGKGYHLM SFPQSAPHGV VFLHVTVYVPA QEK FTTAPA 1080

ICHDKGAHFP REGVFVS GT HWFVTQRNFY EPQIITDNT FVSG CDVVI GIV TVYDP 1140

LQPELDSFKE ELDKYFKNHT SPDVDLGDIS GINASVVNIQ KEIDRLNEVA KNLNESLIDL 1200  
 HR2

QELGKYEQGS GGYIPEAPRD GQAYVRKDGE WVLLSTFLGG SHHHHHH 1247  
 F

## Key

- SP ■ = Signal Peptide
- RBD ■ = Receptor Binding Domain
- FP ■ = Fusion Peptide
- HR2 ■ = Heptad Repeat 2
- = N-glycosite
- X ■ = Variant, no sequon impact
- | = Furin cleavage site in WT
- Italics* = "Tag"
- XXX ■ = Antigen accessibility
- NTD ■ = N-Terminal Domain
- RBM ■ = Receptor Binding Motif
- HR1 ■ = Heptad Repeat 1
- ..... = Heptad Repeat 2 WT extent
- = O-glycosite
- X ■ = Variant, sequon ablated
- XXX ■ = Divergent region w/ insert
- ~~Strikethrough~~ = Signal Peptide

Distance to Substitution Site (Å)

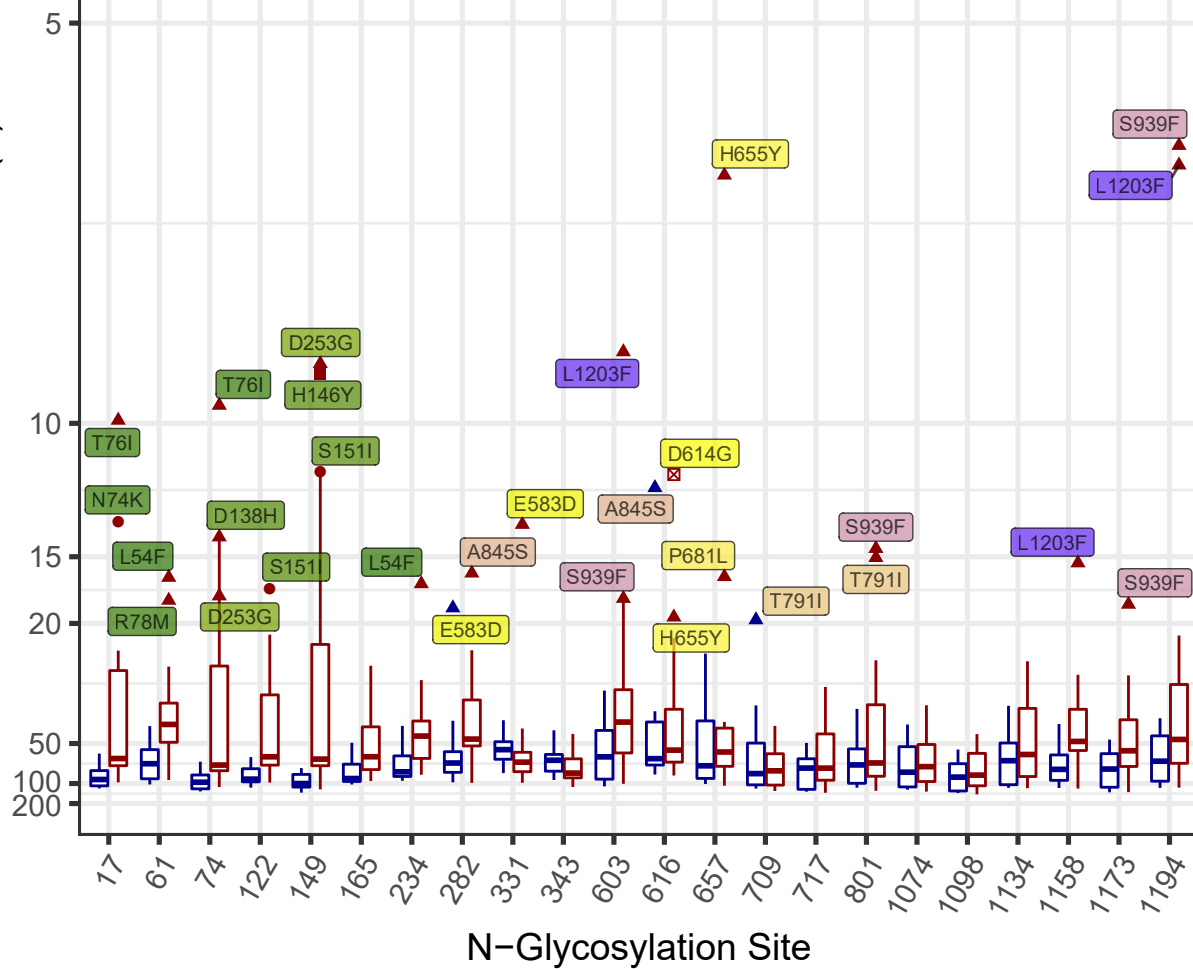

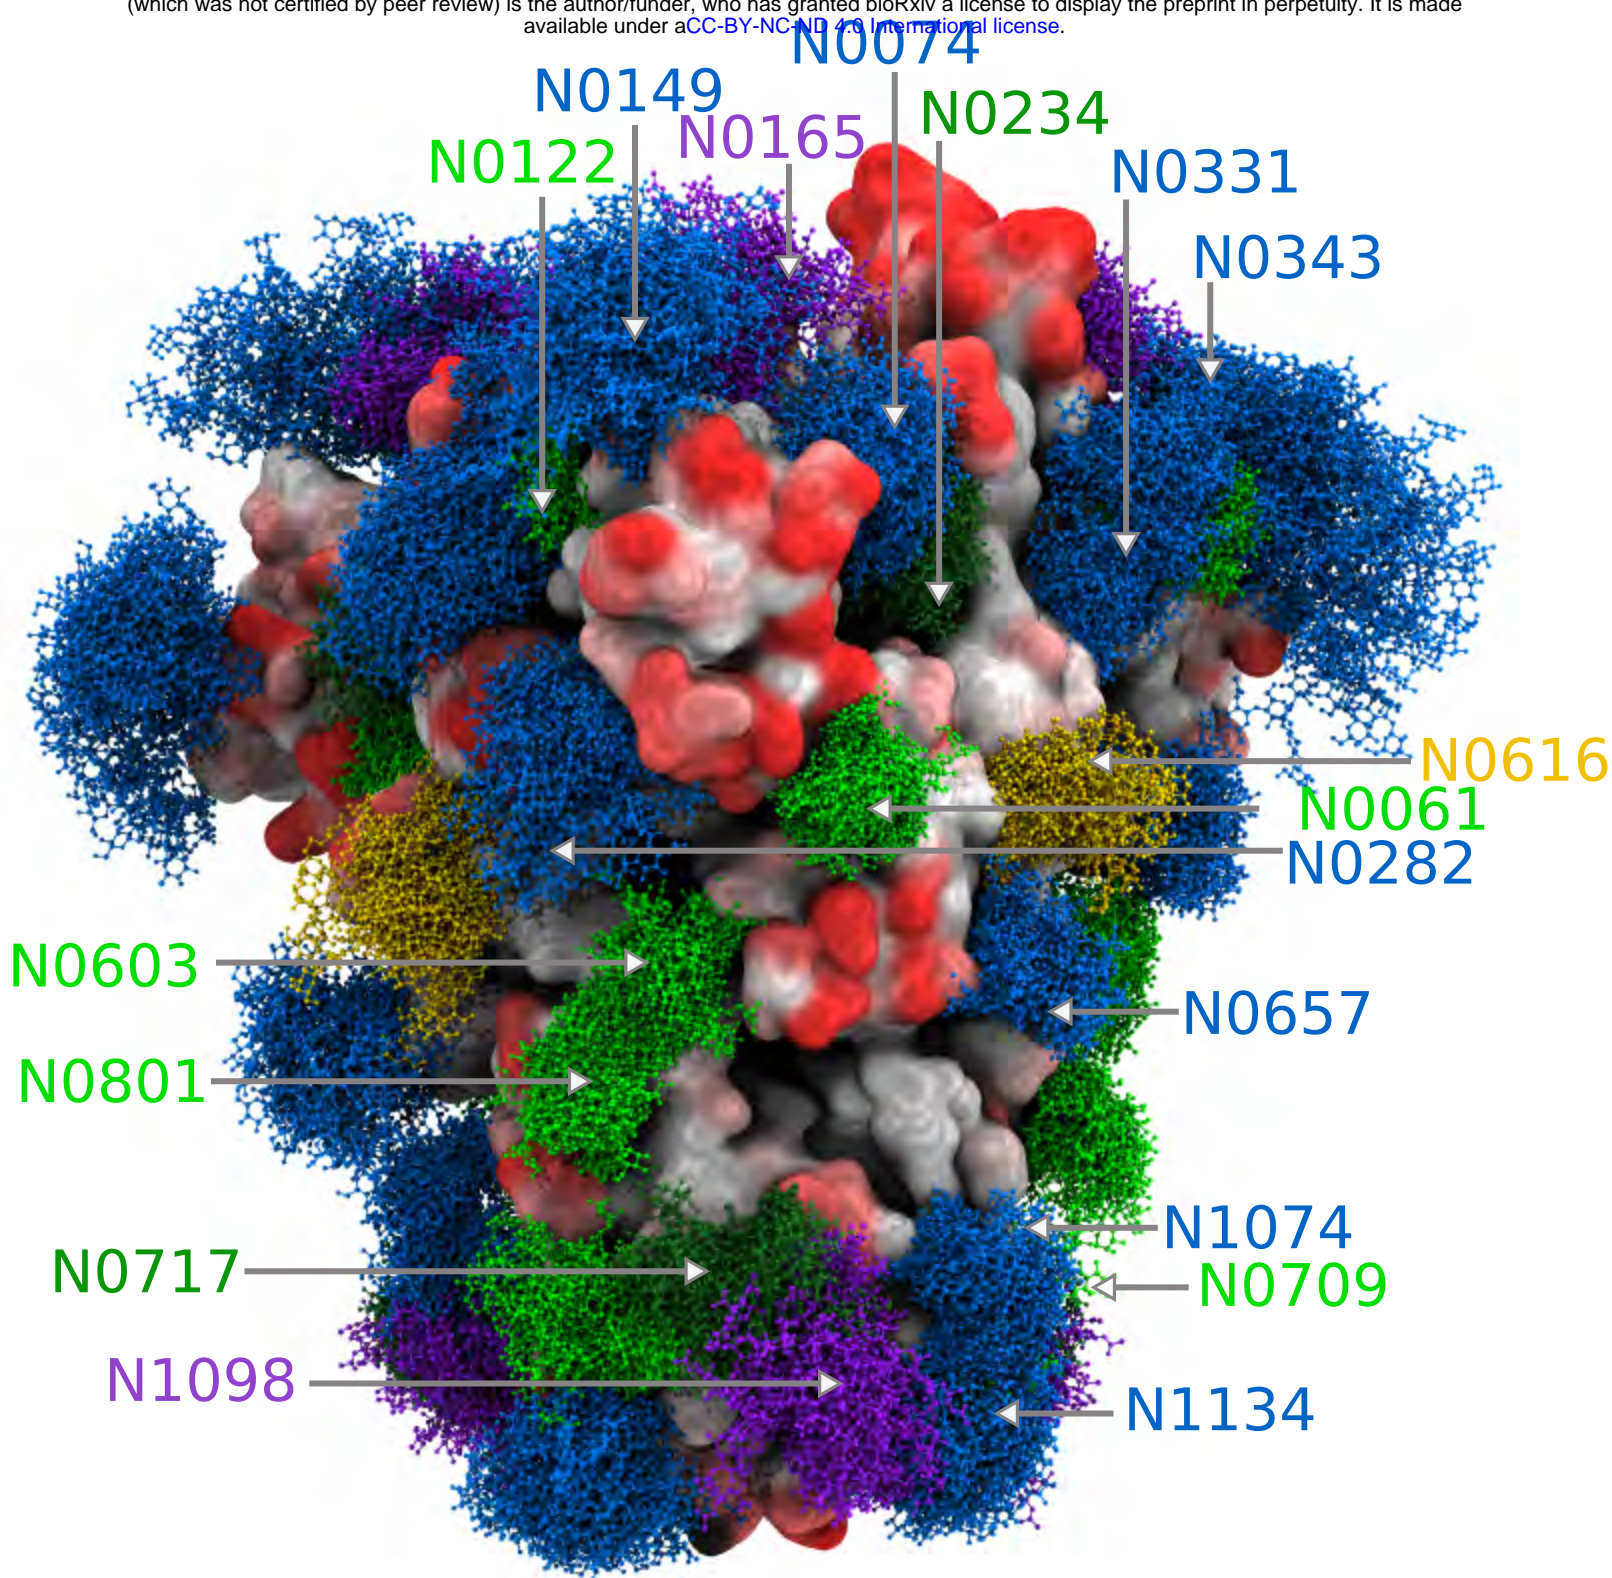

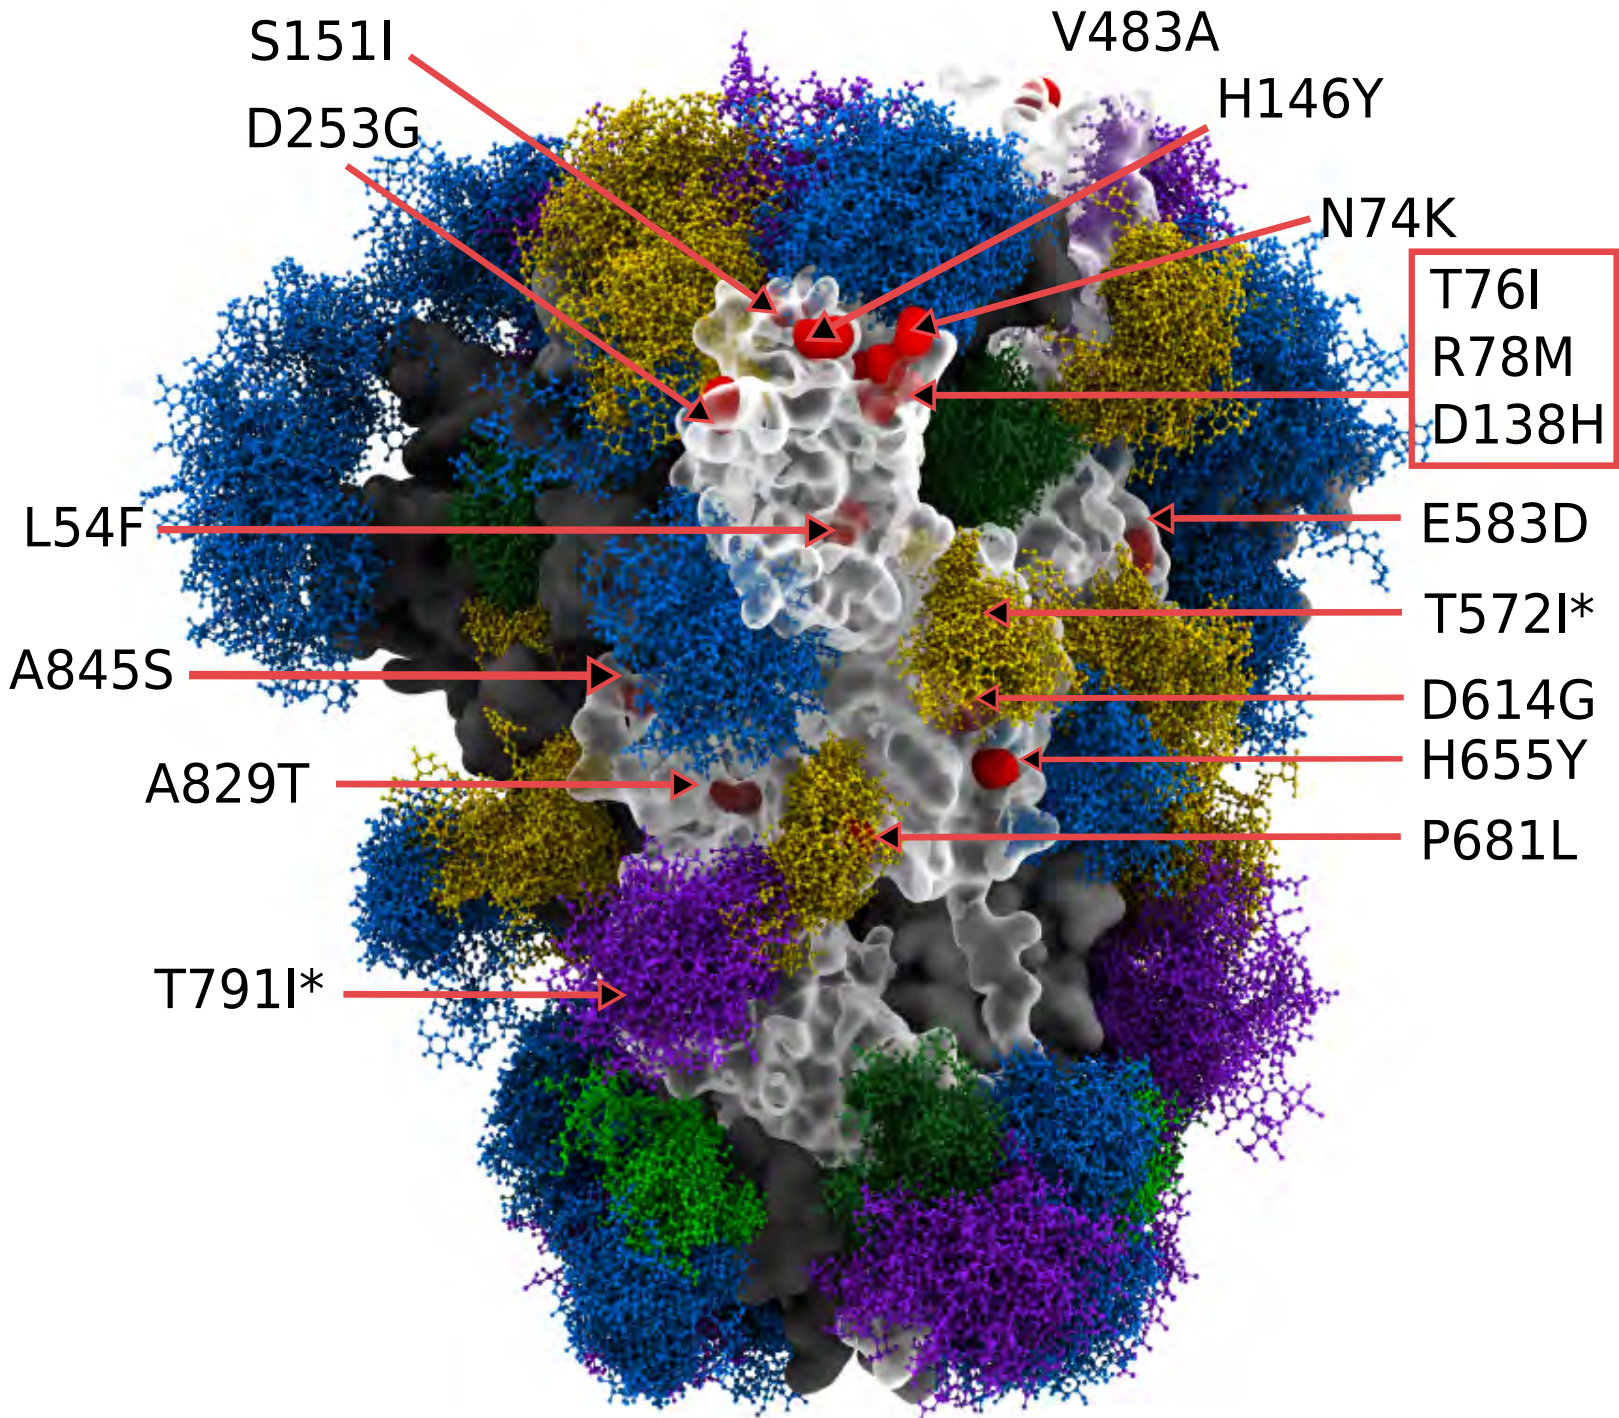



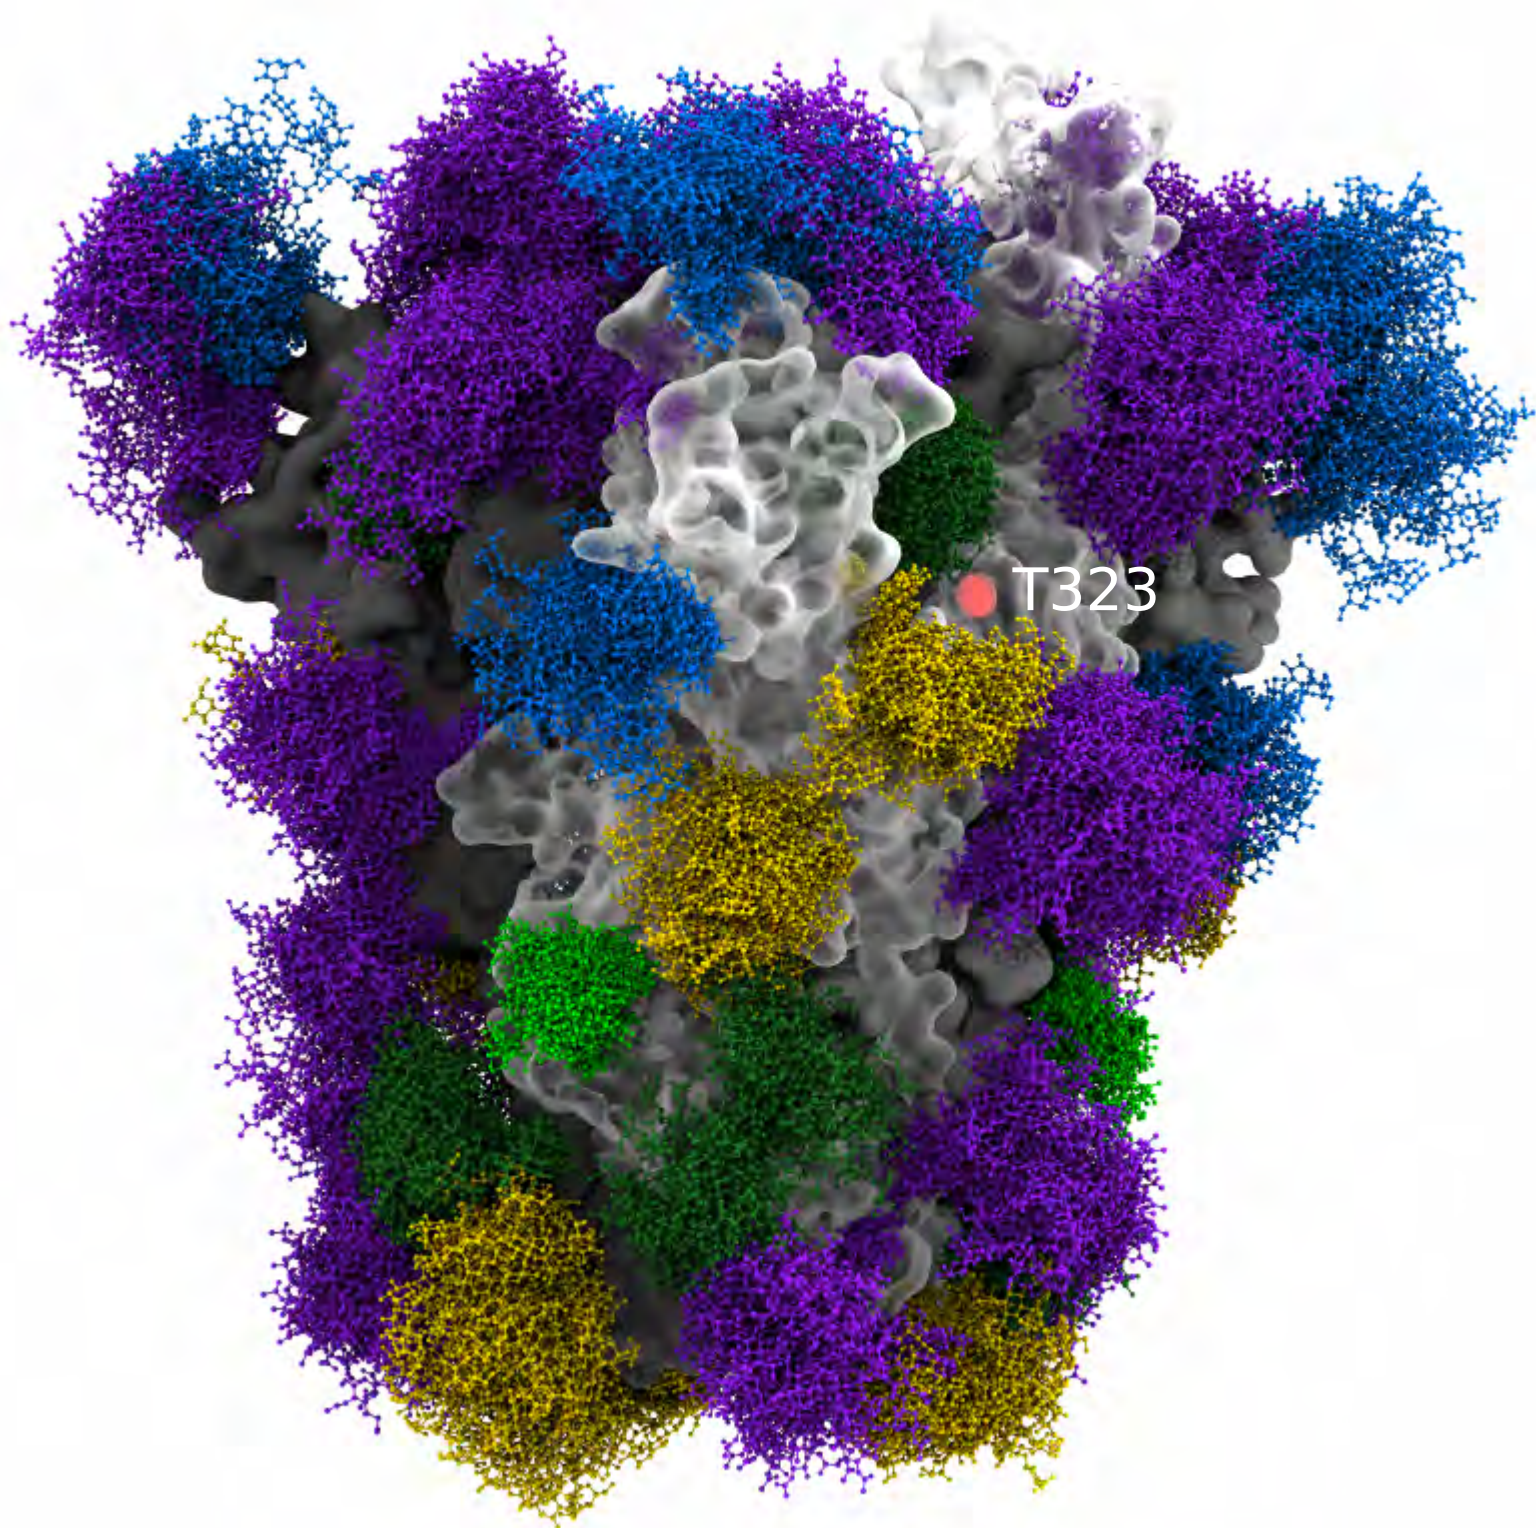

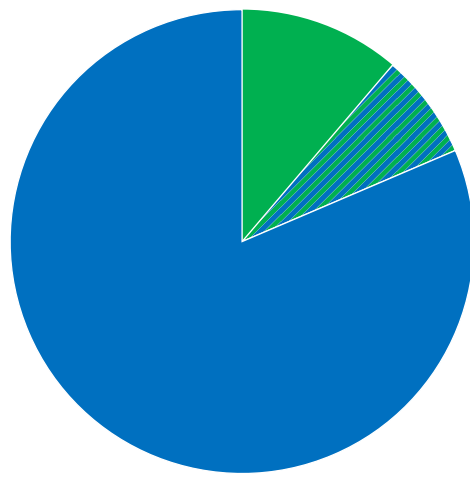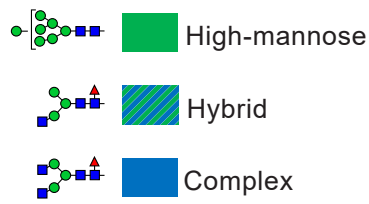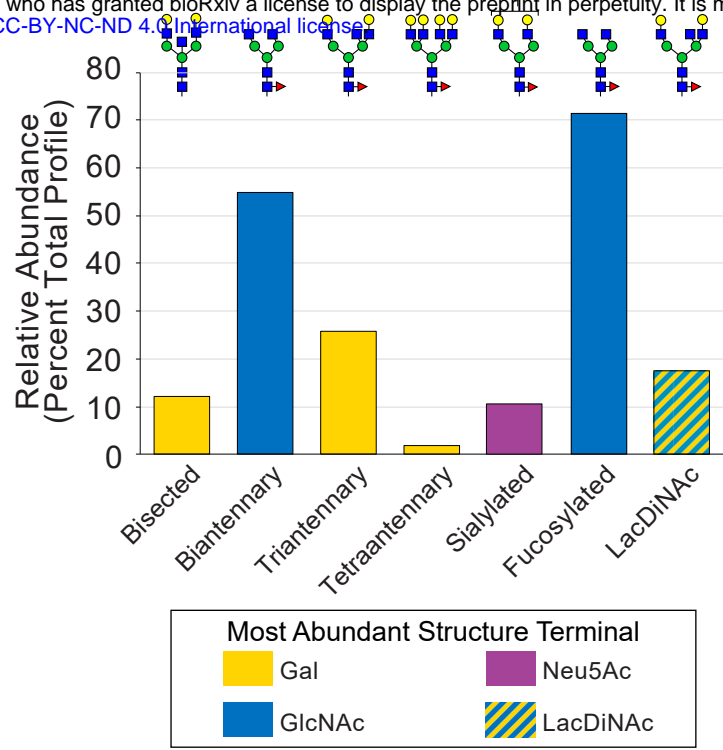

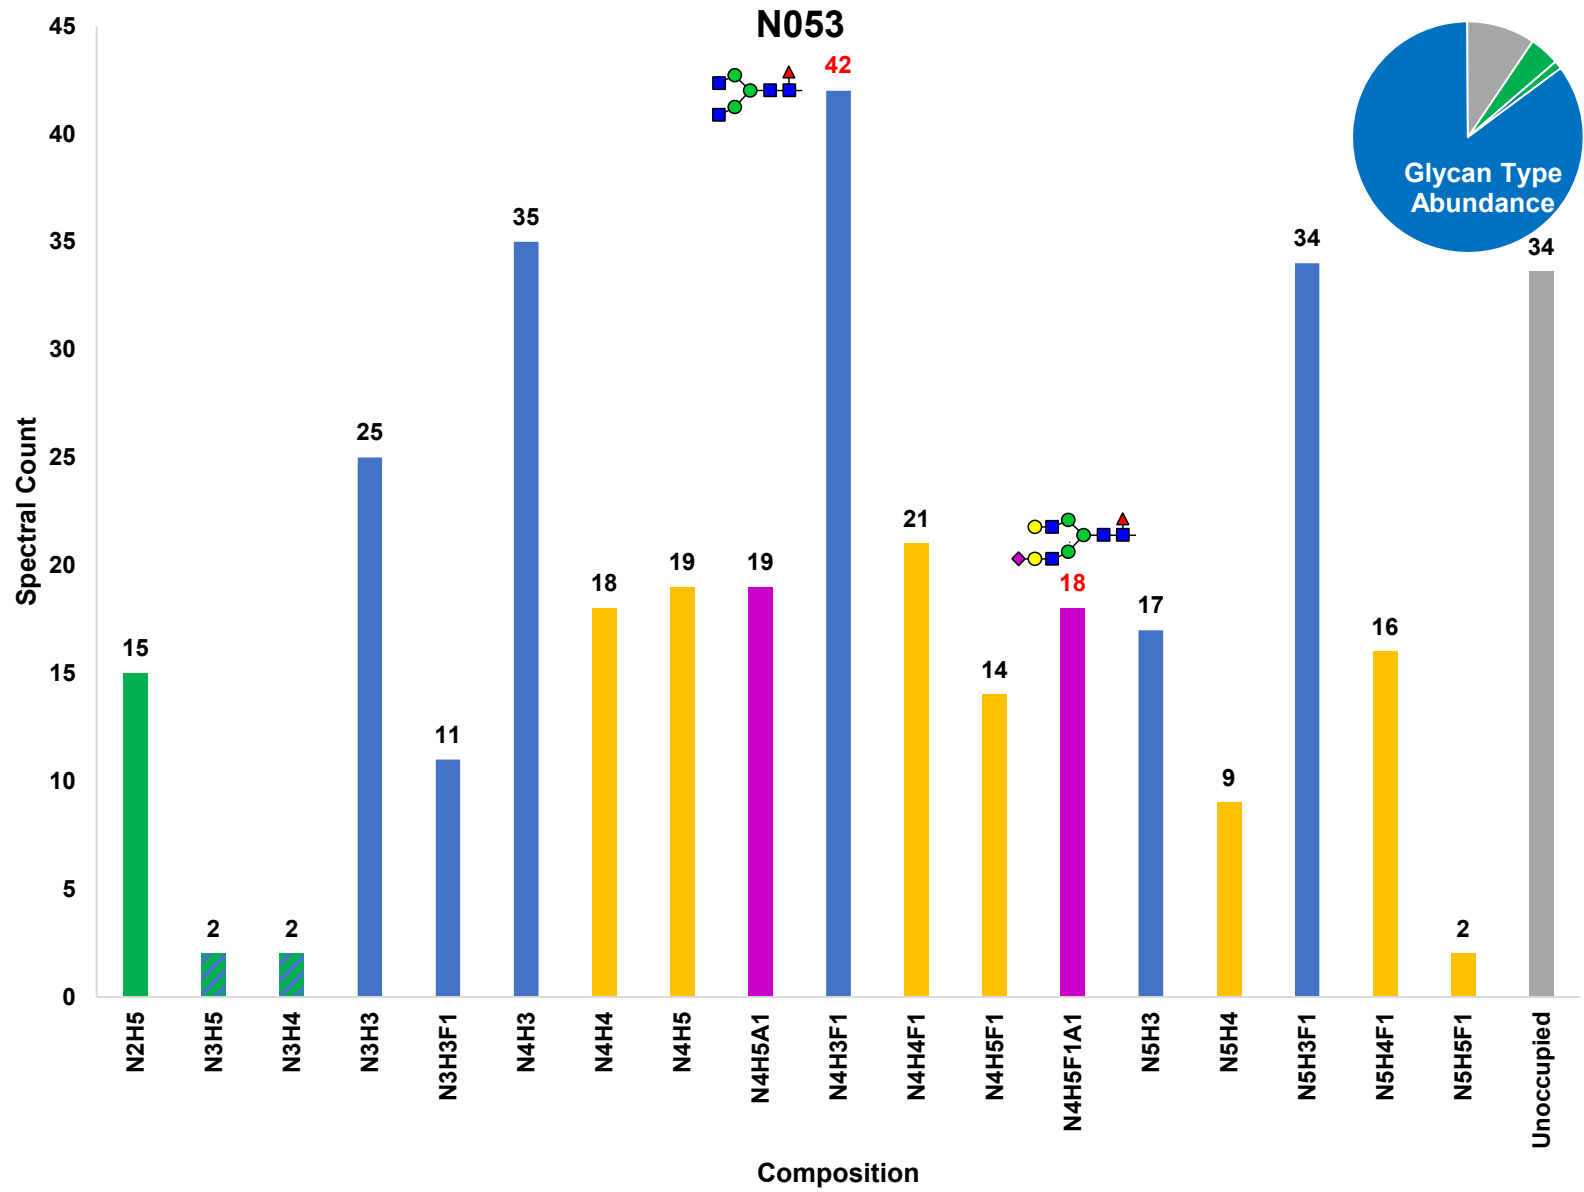

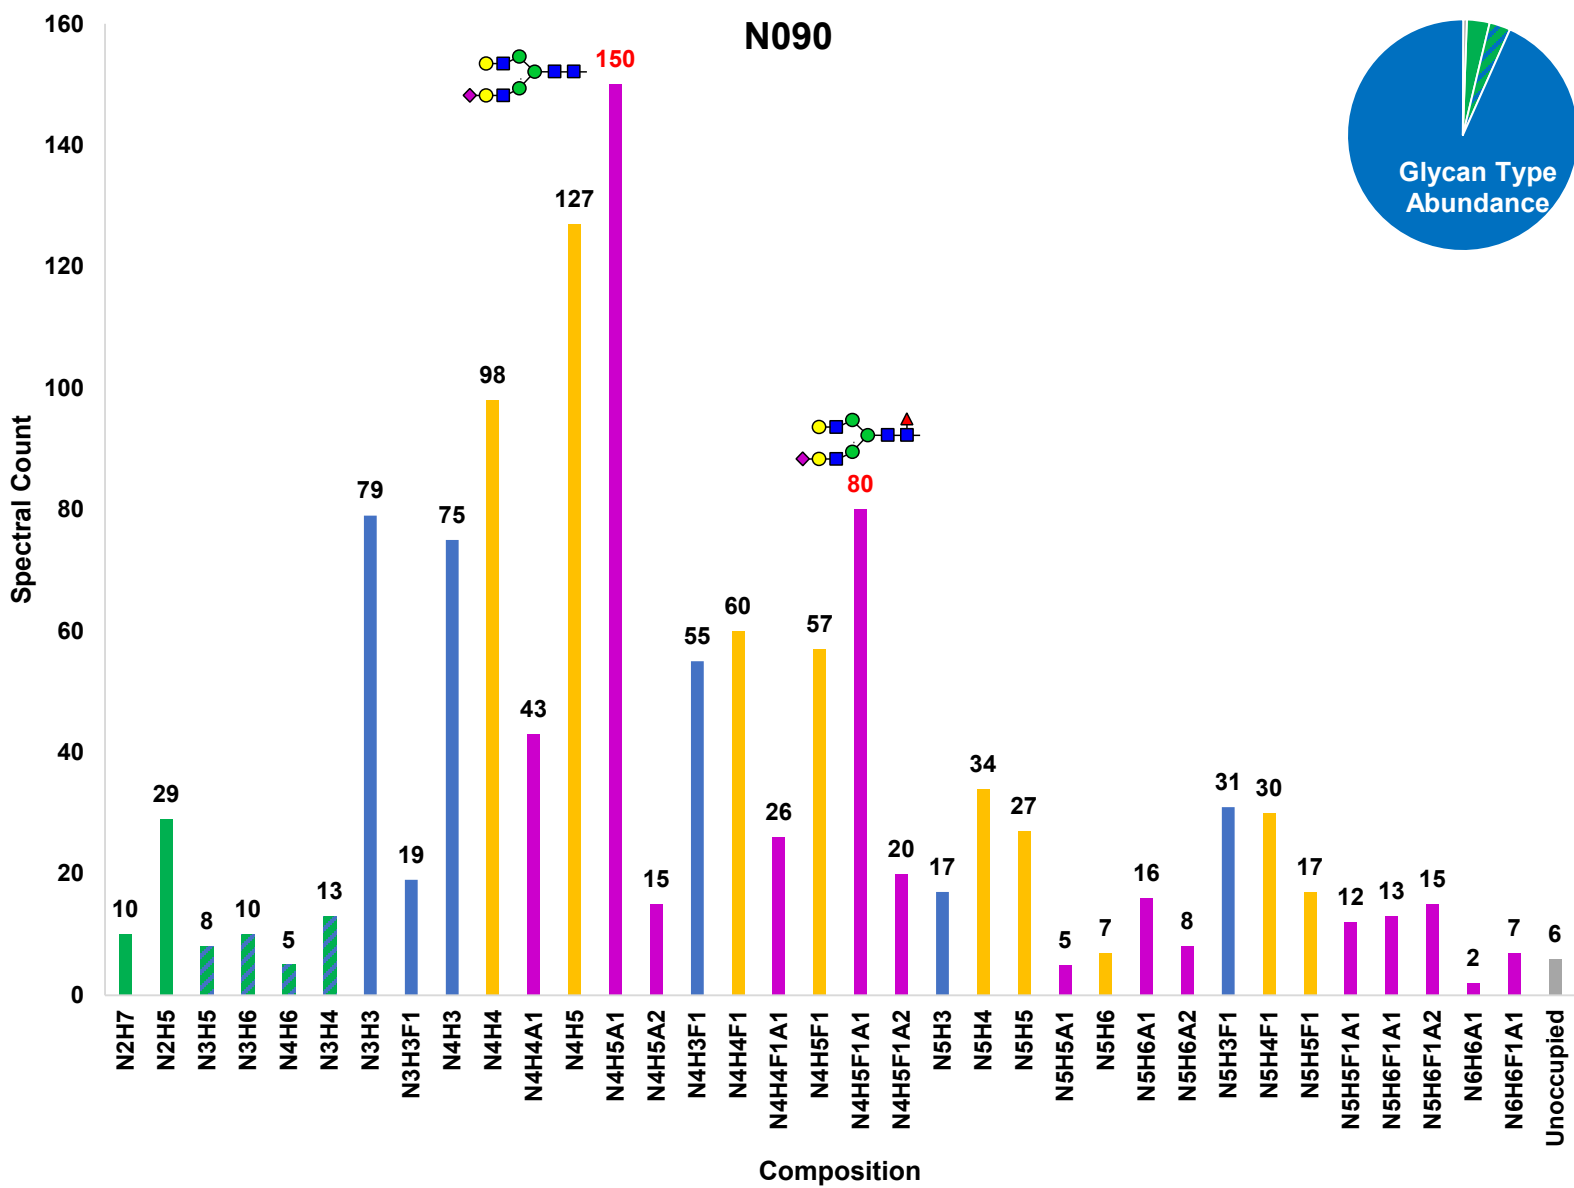

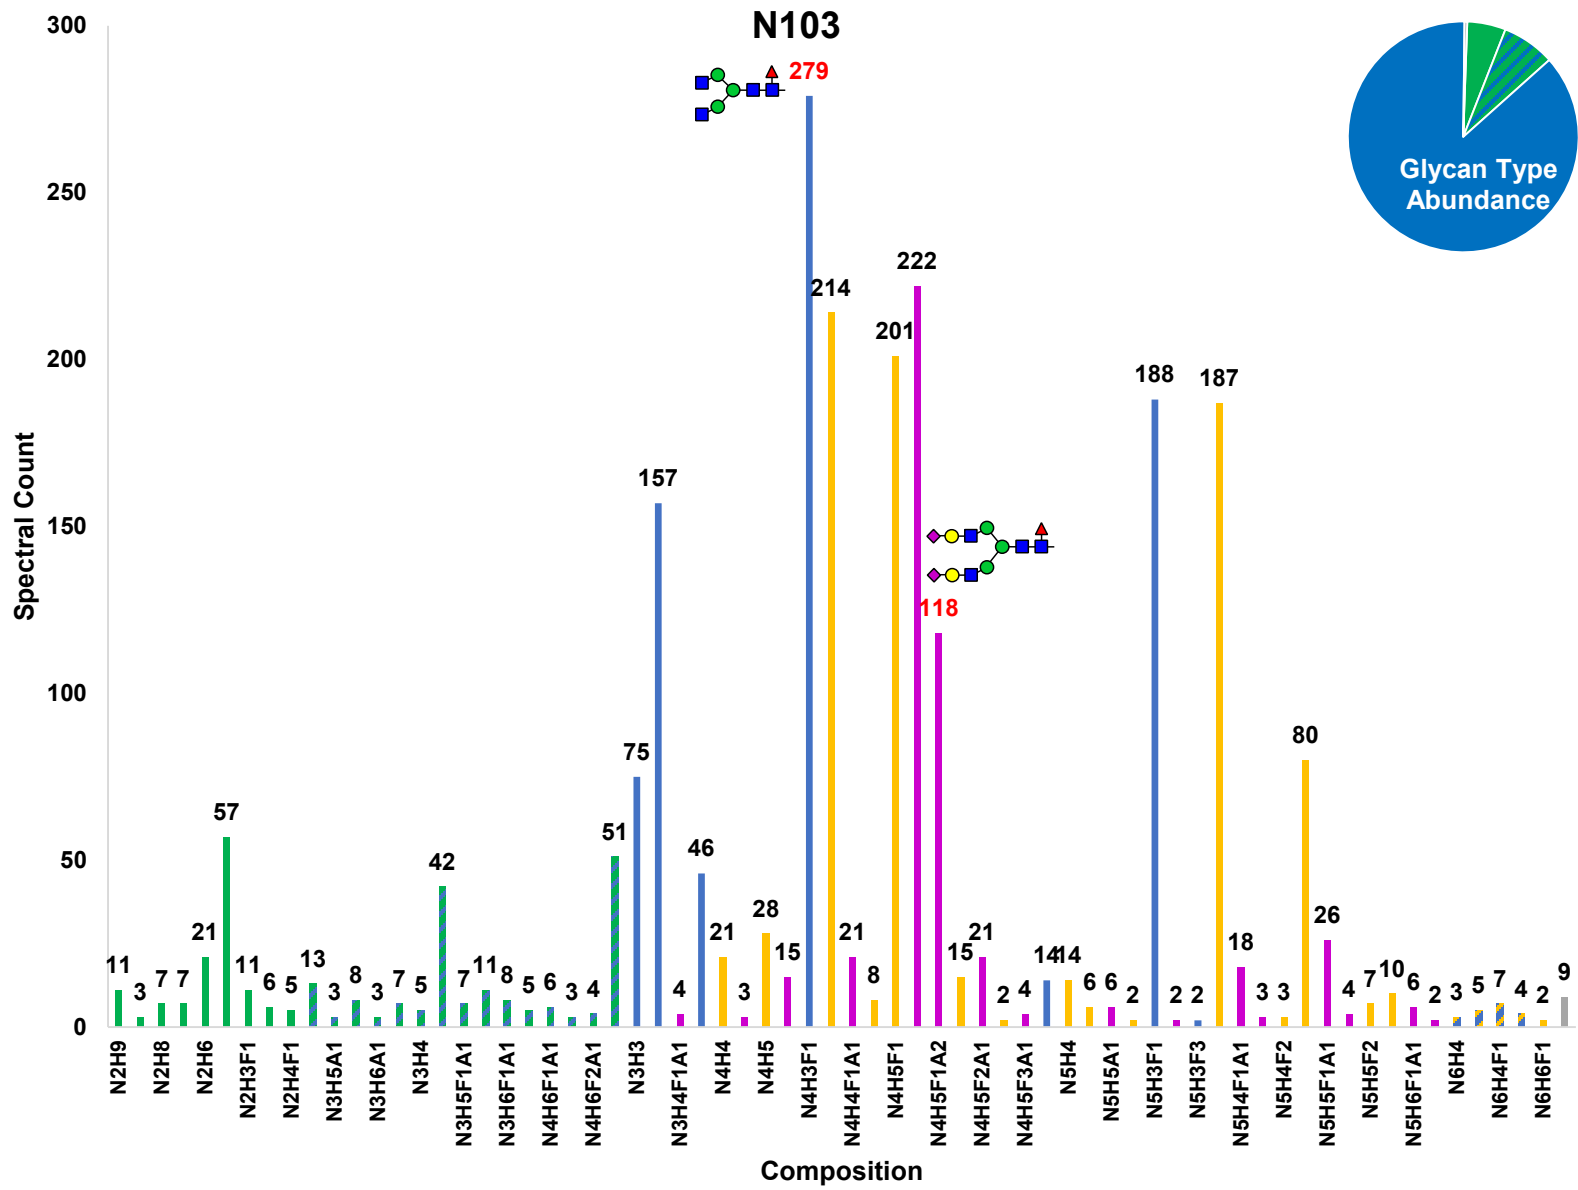

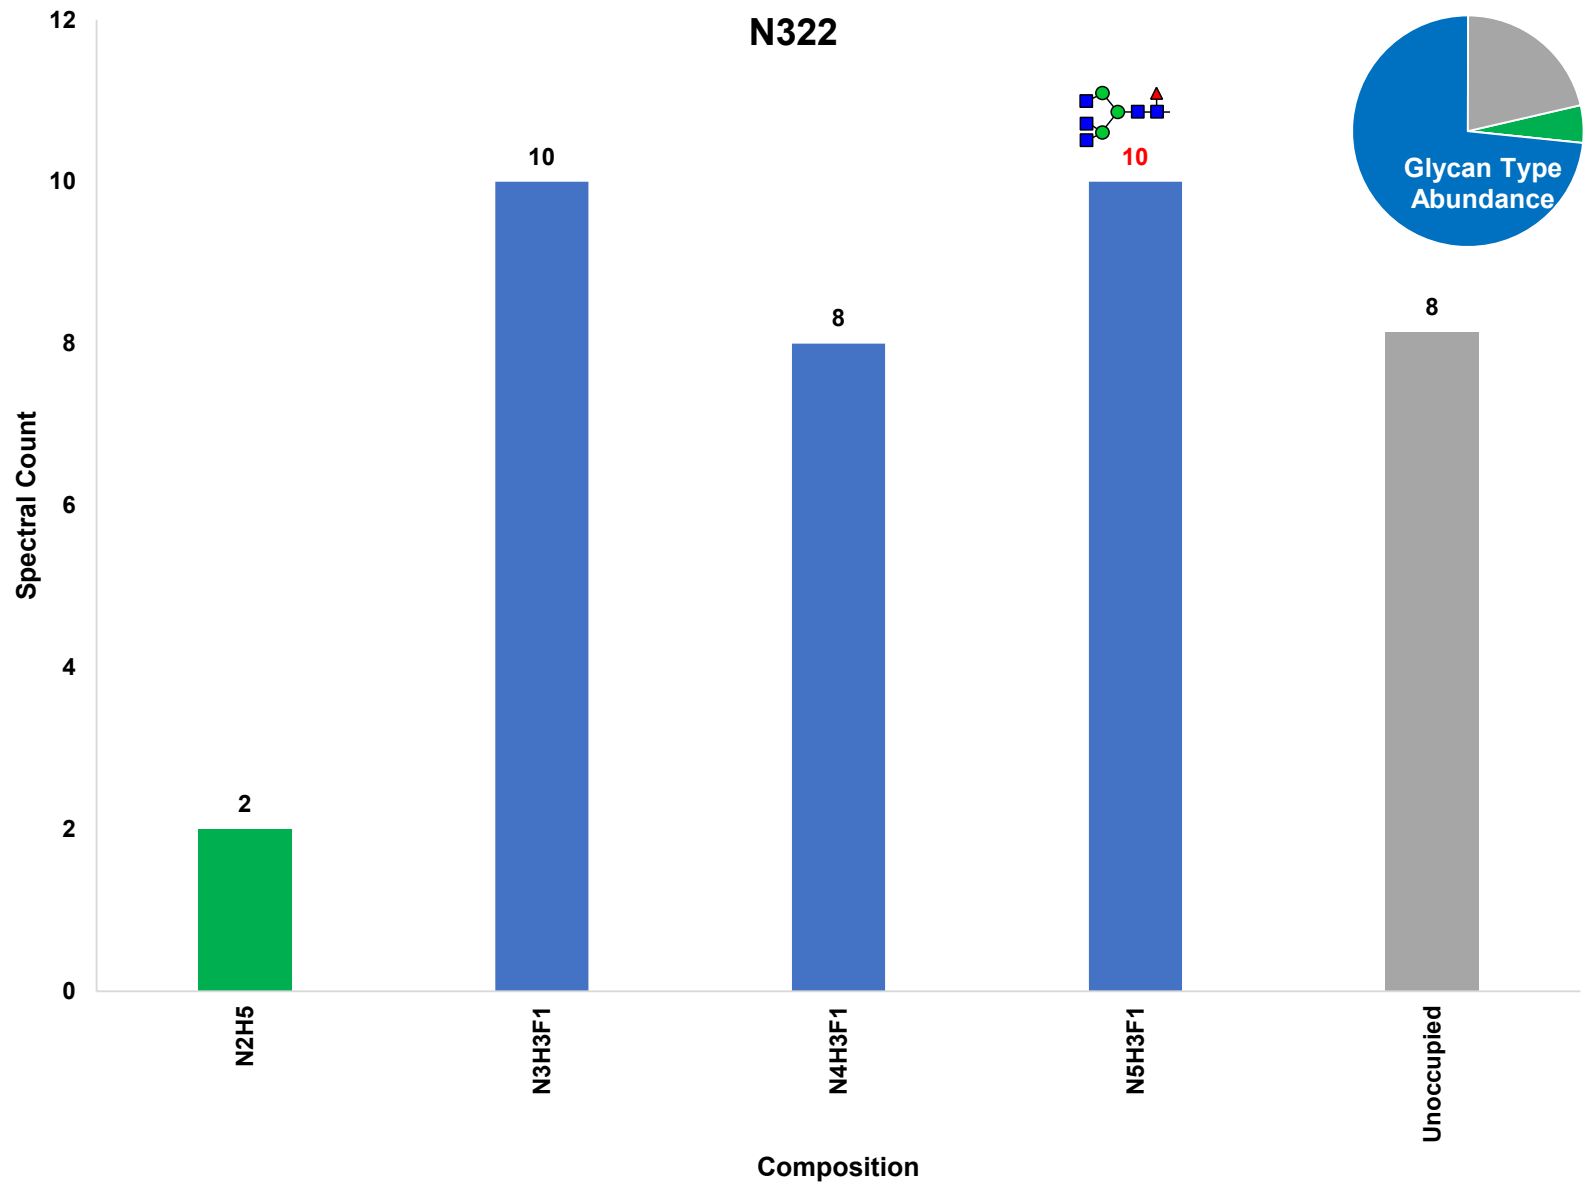

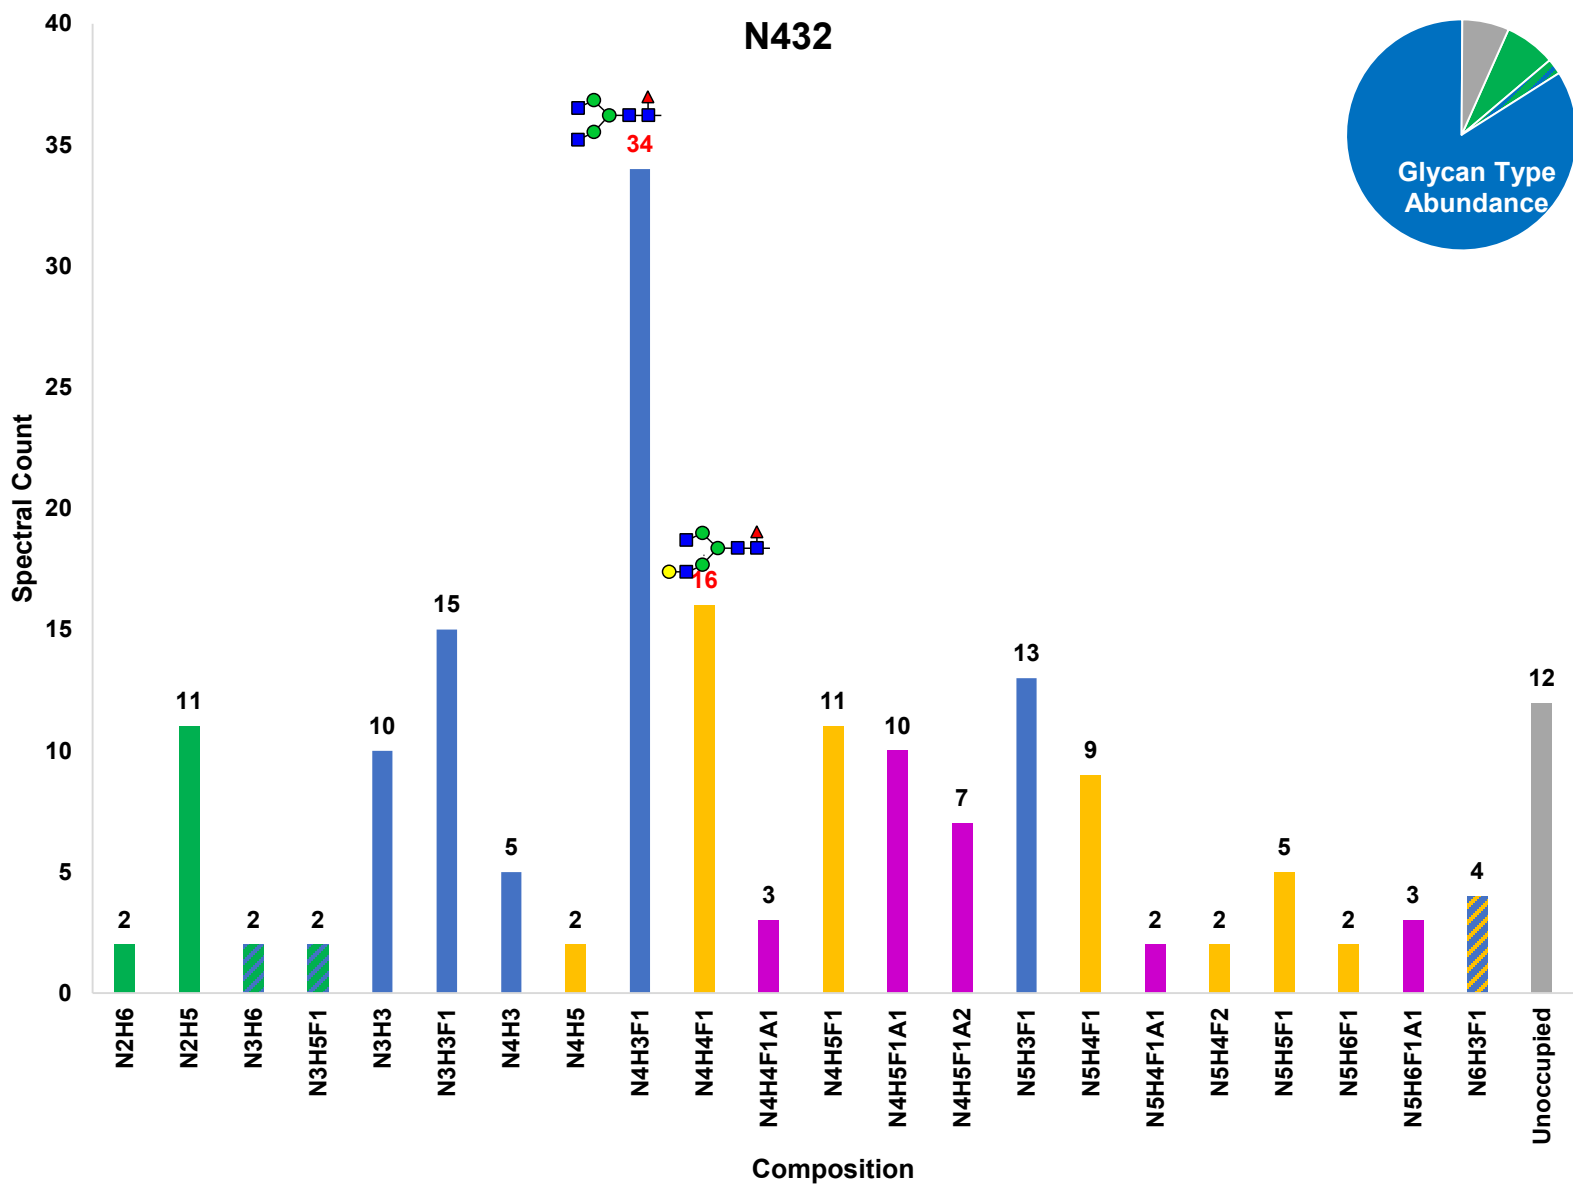

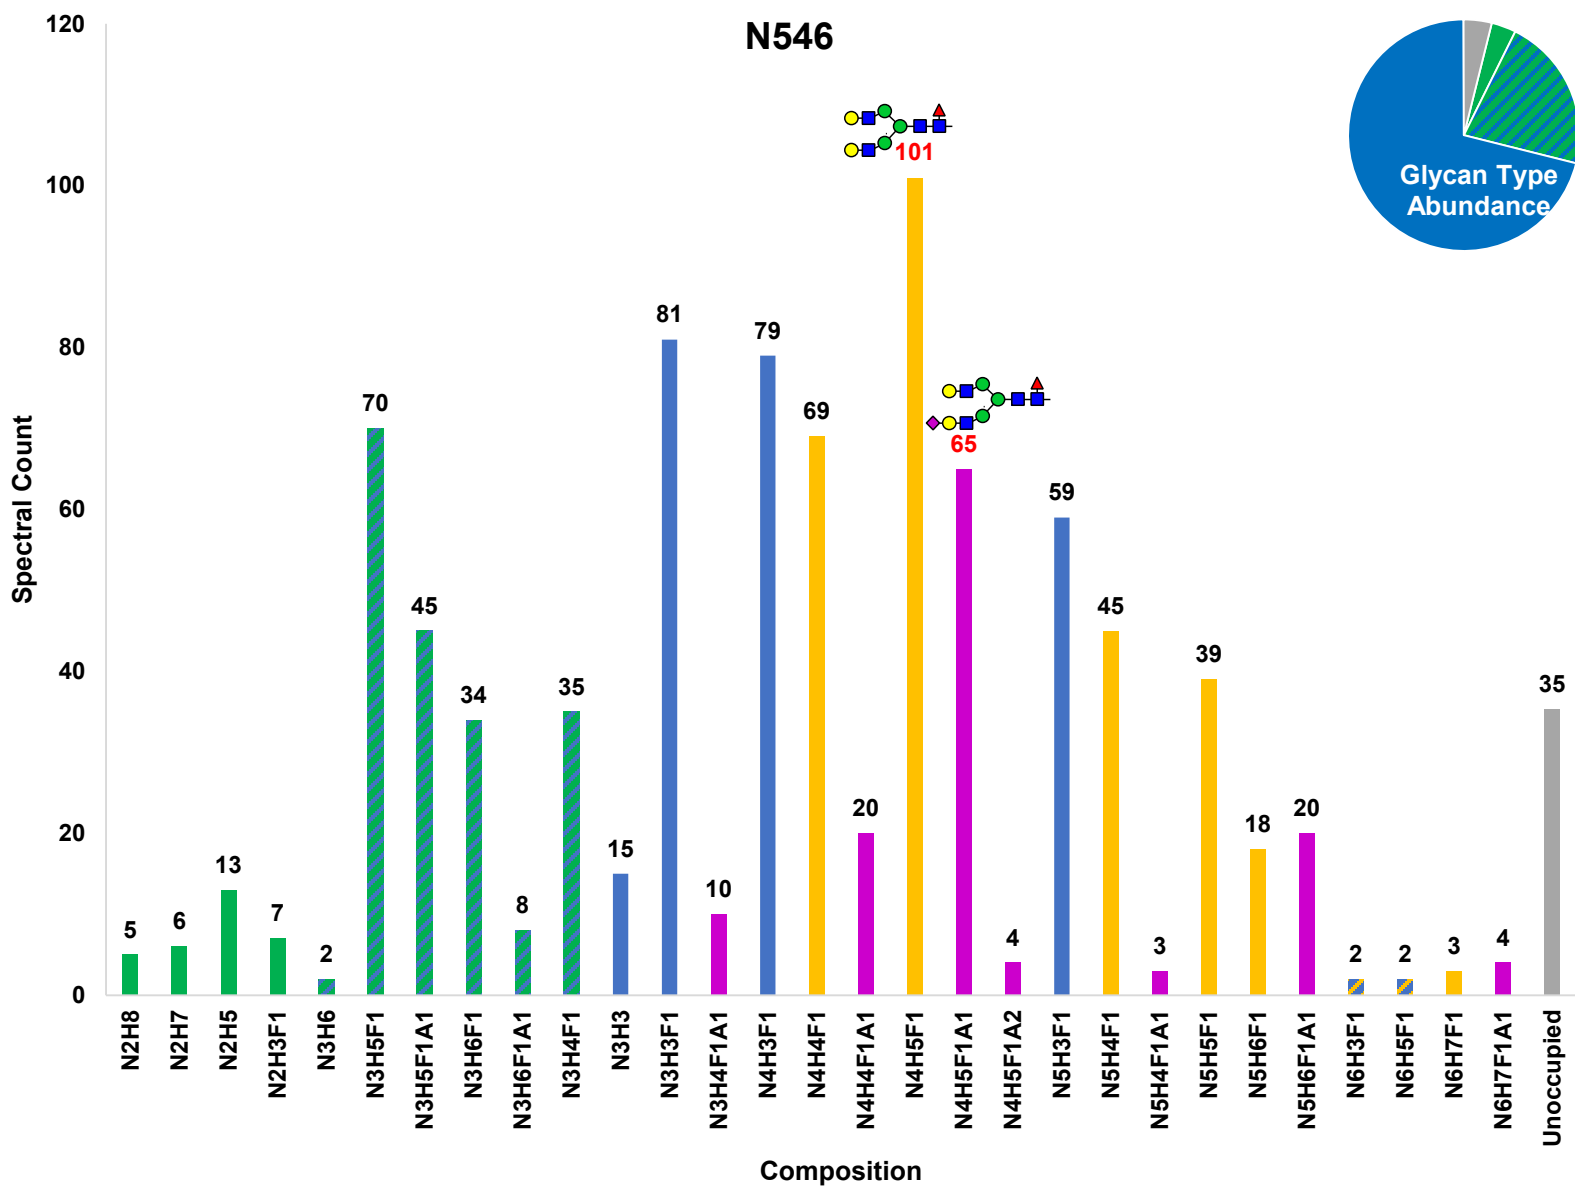



|                                                                                        |     |
|----------------------------------------------------------------------------------------|-----|
| <del>MSSSSWLLLS</del> <b>SP</b> LVAVTAA ST IEEQAKTFLD KFNHEAEDLF YQSSLASWNY NTNITEENVQ | 60  |
| NMNNAGDKWS AFLKEQSTLA QMYPLQEIQN LTVKLQLQAL QQNGSSVLSE DSKRRLNTIL                      | 120 |
| NTMSTIYSTG KVCNPDNPQE CLLLEPGLNE IMANSLDYNE RLWAWESWRS EVGKQLRPLY                      | 180 |
| EEYVVLKNEM ARANHYEDYG DYWRGDYEVN GVDGYDYSRG QLIEDVEHTF EEIKPLYEHL                      | 240 |
| HAYVRAKLMN AYPSYISPIG CLPAHLLGDM WGRFWTNLYS LTVPFQKPN IDVTDAMVDQ                       | 300 |
| AWDAQRFKE AEKFFVSVGL PNMTQGFVEN SMLTDPGNVQ KAVCHPTAWD LGKGDFRILM                       | 360 |
| CTKVTMDDFL TAHHEMGHIQ YDMAYAAQPF LLRNGANEGF HEAVGEIMSL SAATPKHLKS                      | 420 |
| IGLLSPDFQE DNETEINFLK KQALTIVGTL PFTYMLEKWR WMVFKGEIPK DQWMKKWEM                       | 480 |
| KREIVGVVEP VPHDETYCDP ASLFHVSNDY SFIRYYRTL YQFQFQEALC QAAKHEGPLH                       | 540 |
| KCDISNSTEA GQKLFNMLRL GKSEPWTLAL ENVVGAKNMN VRPLLNYFEP LFTWLKDQNK                      | 600 |
| NSFVGWSTDW <i>SPYADSGGSH HHHHH</i>                                                     | 625 |

### Key

|                                    |                                           |
|------------------------------------|-------------------------------------------|
| <b>■ SP ■</b> = Signal Peptide     | <b>— PD —</b> = Peptidase M2, ACE Domain  |
| <b>■</b> = N-glycosite             | <b>X or X</b> = Variant, no sequon impact |
| <b>X</b> = Variant, sequon ablated | <del>SP</del> = Signal Peptide            |
| <i>Italics</i> = "Tag"             |                                           |

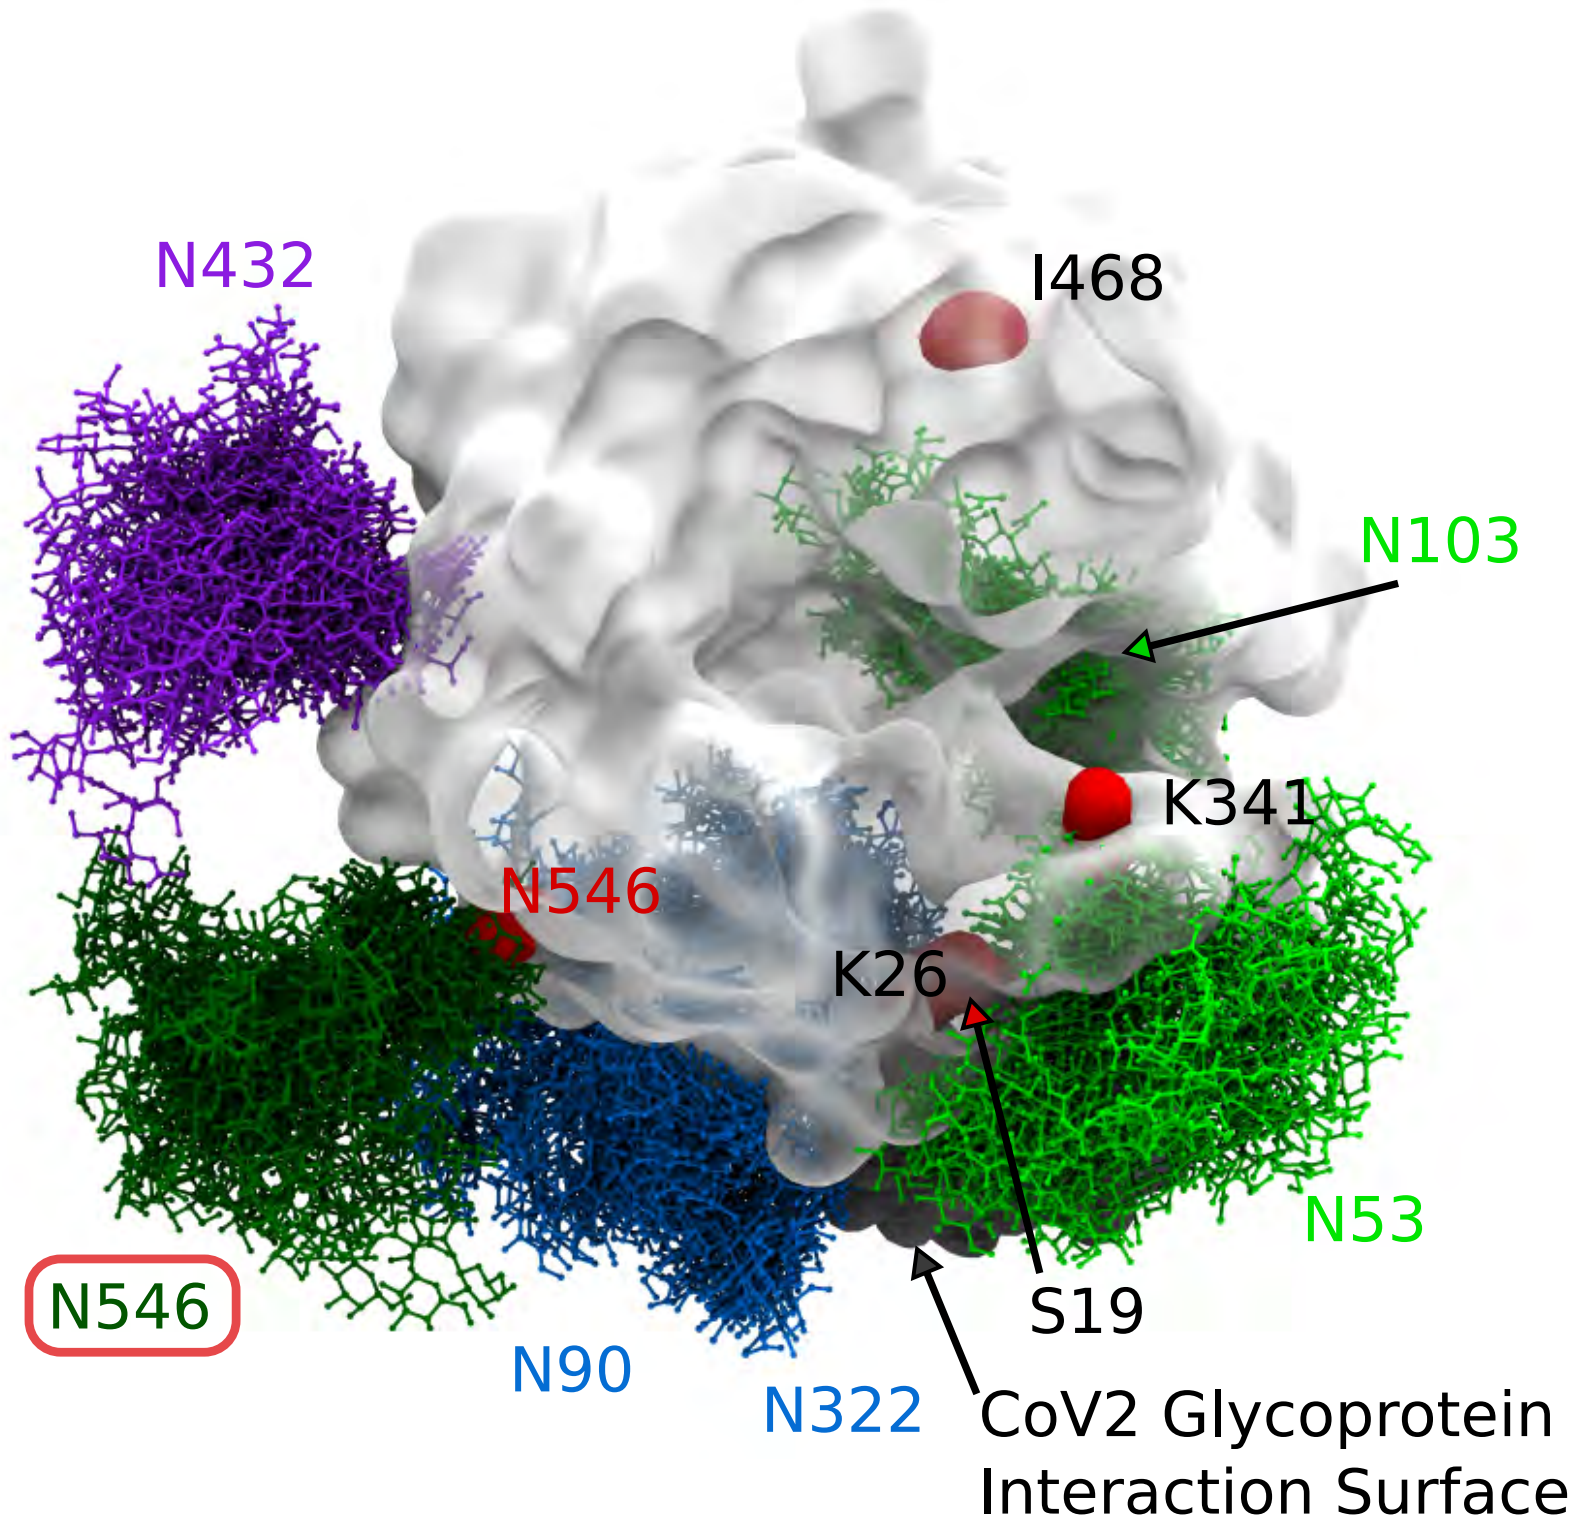

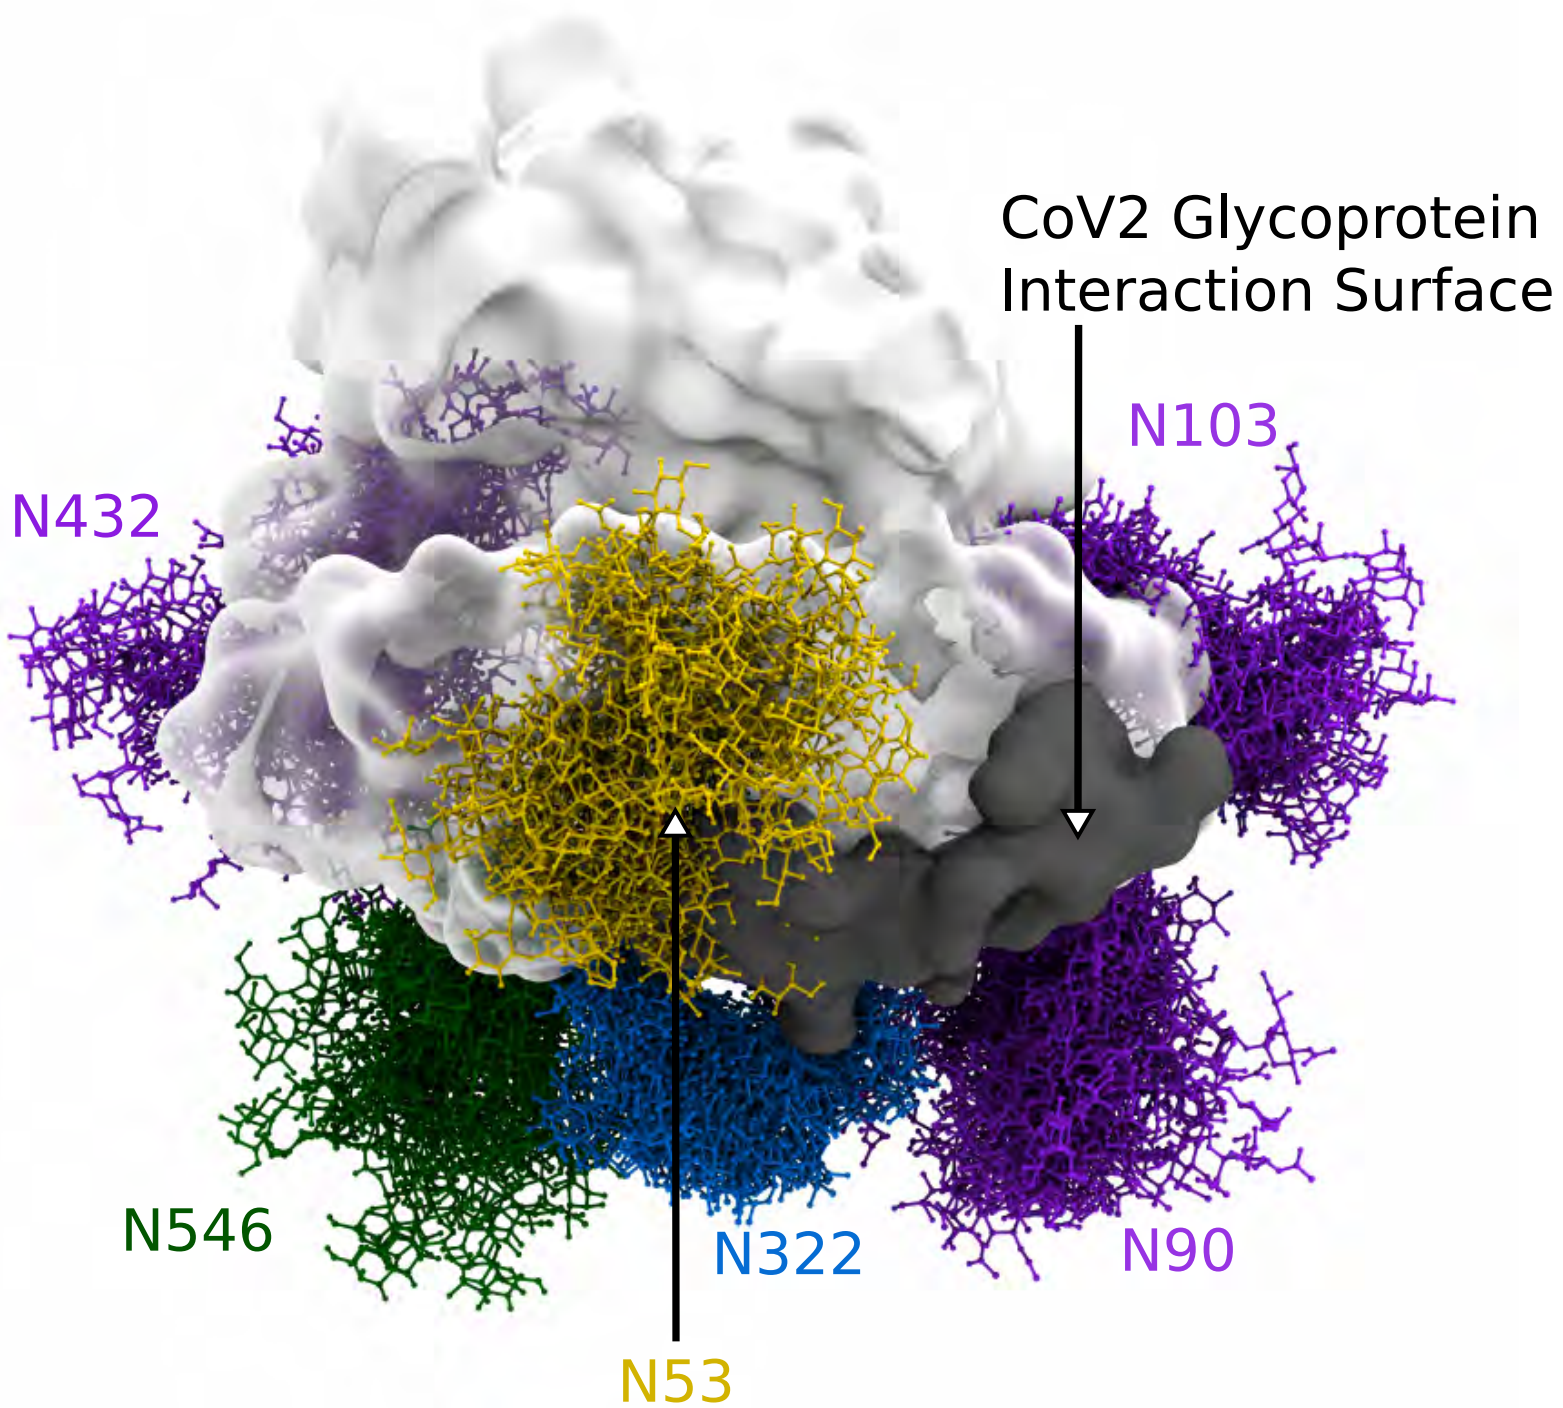

# SARS-CoV-2 S

# ACE2

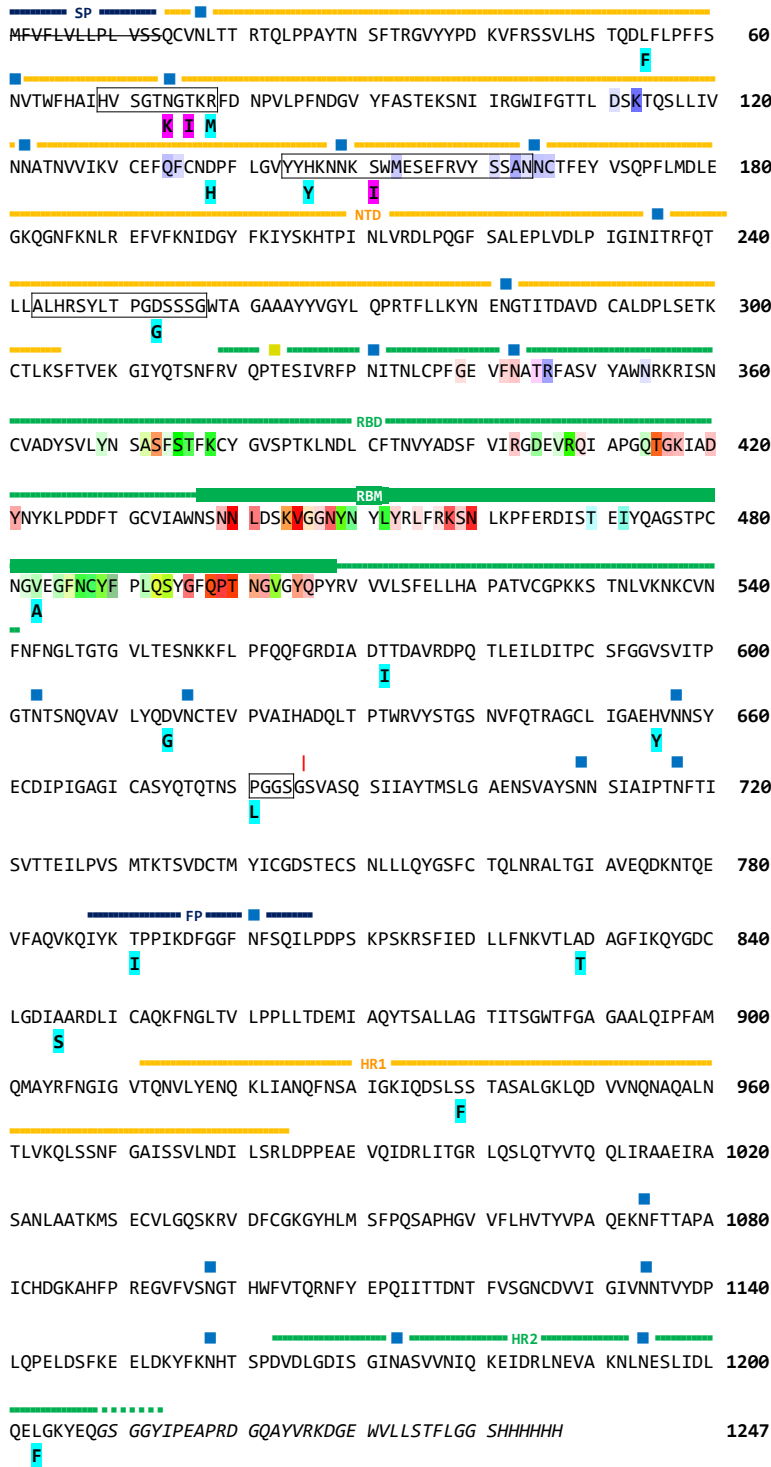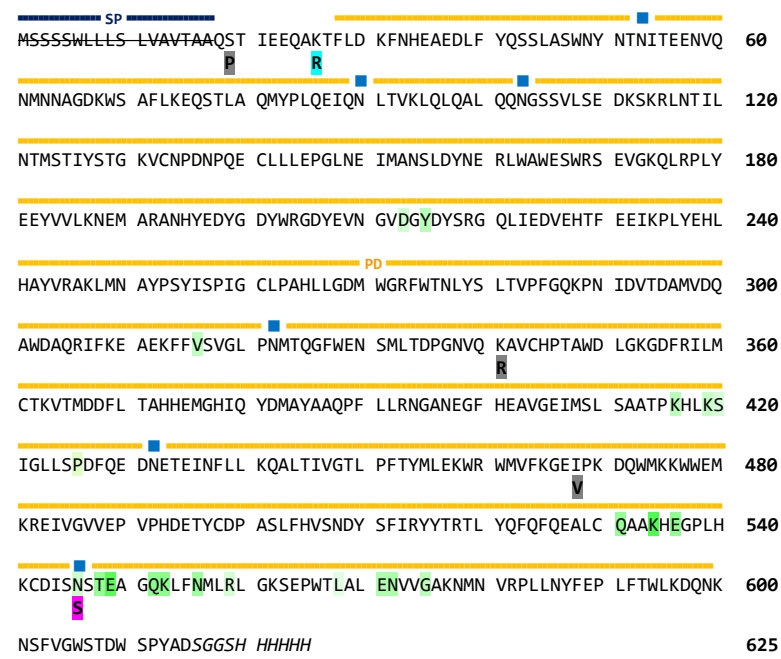

## SARS-CoV-2 S Key

|                |                             |                          |                              |
|----------------|-----------------------------|--------------------------|------------------------------|
| SP             | = Signal Peptide            | NTD                      | = N-Terminal Domain          |
| RBD            | = Receptor Binding Domain   | RBM                      | = Receptor Binding Motif     |
| FP             | = Fusion Peptide            | HR1                      | = Heptad Repeat 1            |
| HR2            | = Heptad Repeat 2           |                          | = Heptad Repeat 2 WT extent  |
|                | = N-glycosite               |                          | = O-glycosite                |
|                | = Variant, no sequon impact |                          | = Variant, sequon ablated    |
|                | = Furin cleavage site in WT |                          | = Divergent region w/ insert |
| <i>Italics</i> | = "Tag"                     | <del>Strikethrough</del> | = Signal Peptide             |
|                | = ACE2 glycan interaction   |                          |                              |

## ACE2 Key

|                          |                           |                |                              |
|--------------------------|---------------------------|----------------|------------------------------|
| SP                       | = Signal Peptide          | PD             | = Peptidase M2, ACE Domain   |
|                          | = N-glycosite             |                | = Variant, no sequon impact  |
|                          | = Variant, sequon ablated |                | = CoV-2 S glycan interaction |
| <del>Strikethrough</del> | = Signal Peptide          | <i>Italics</i> | = "Tag"                      |

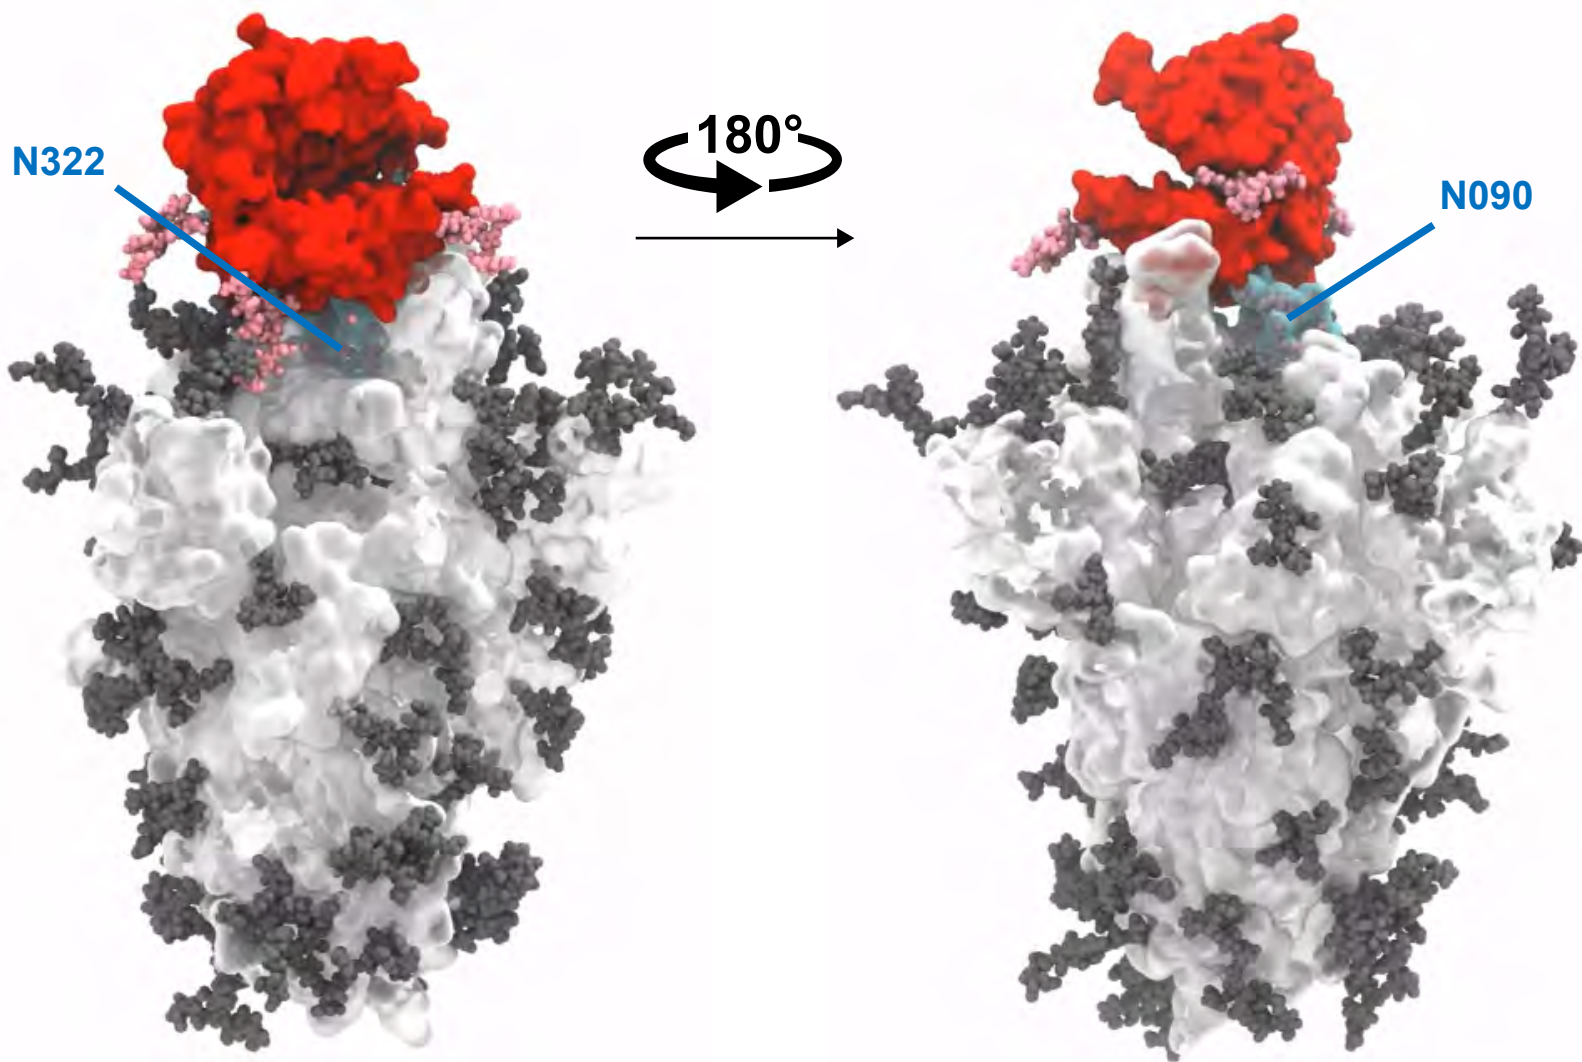

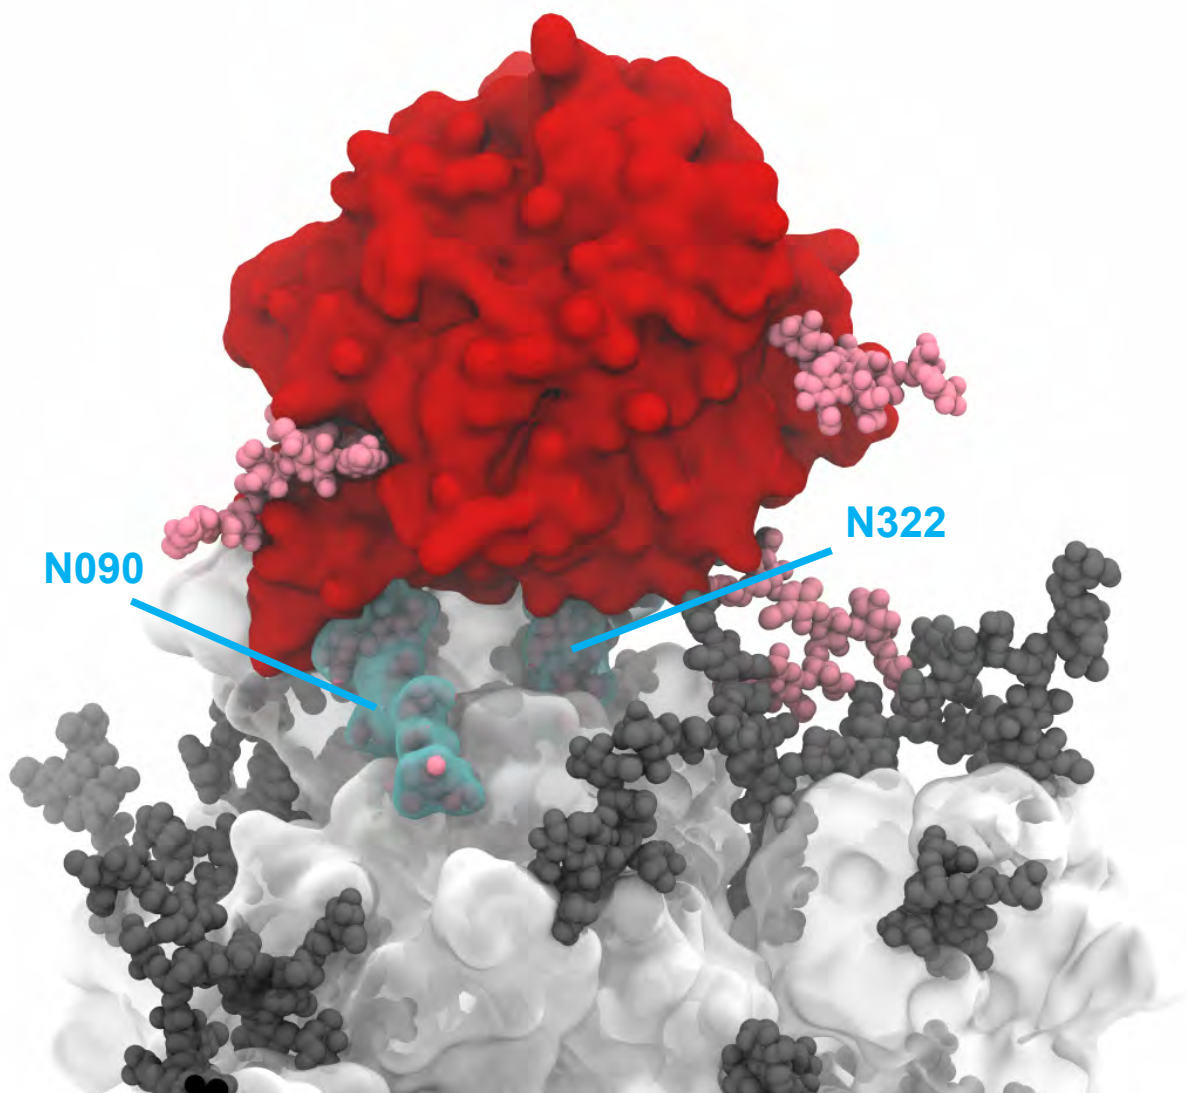

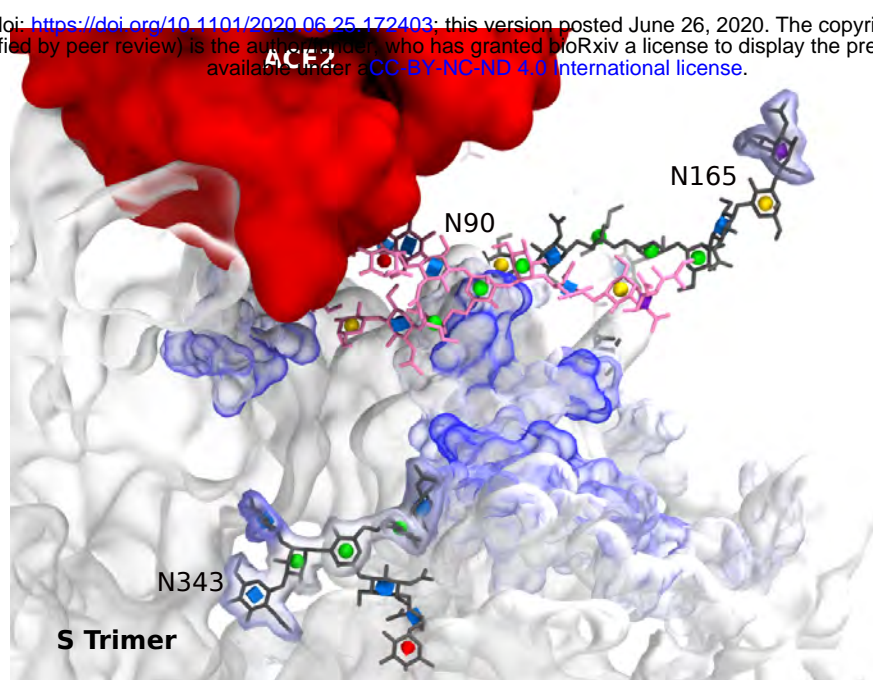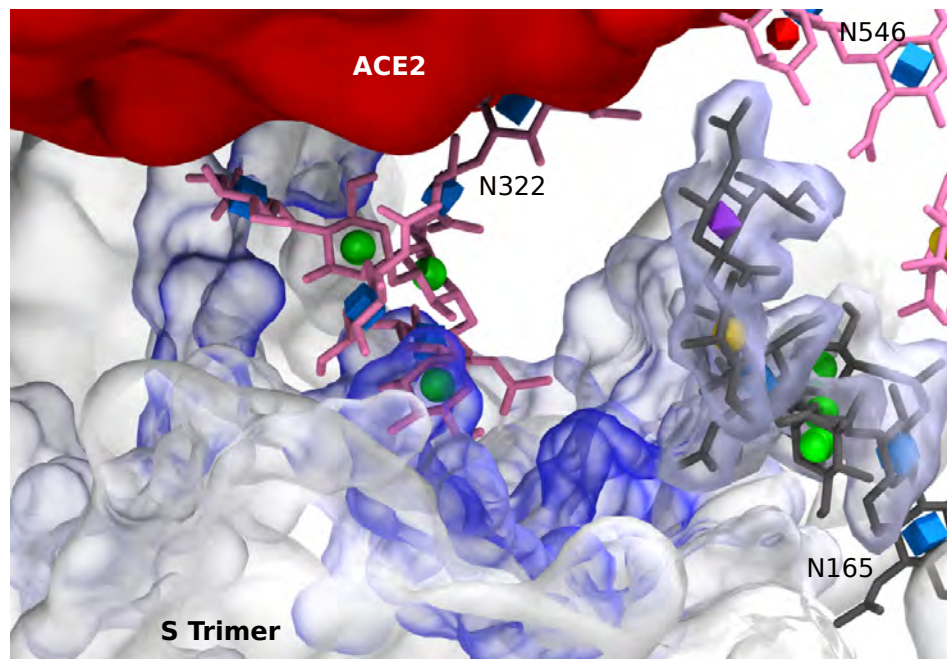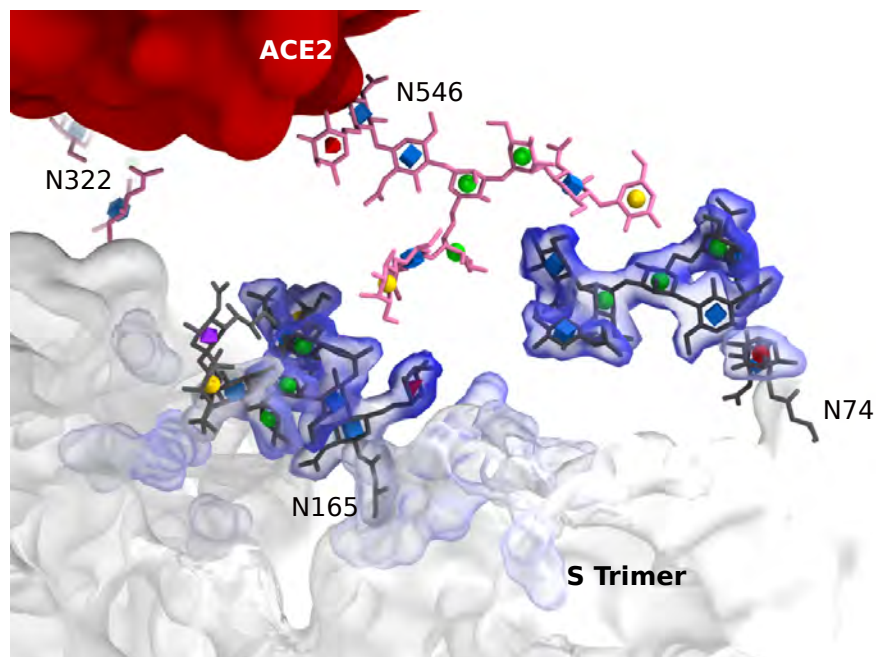

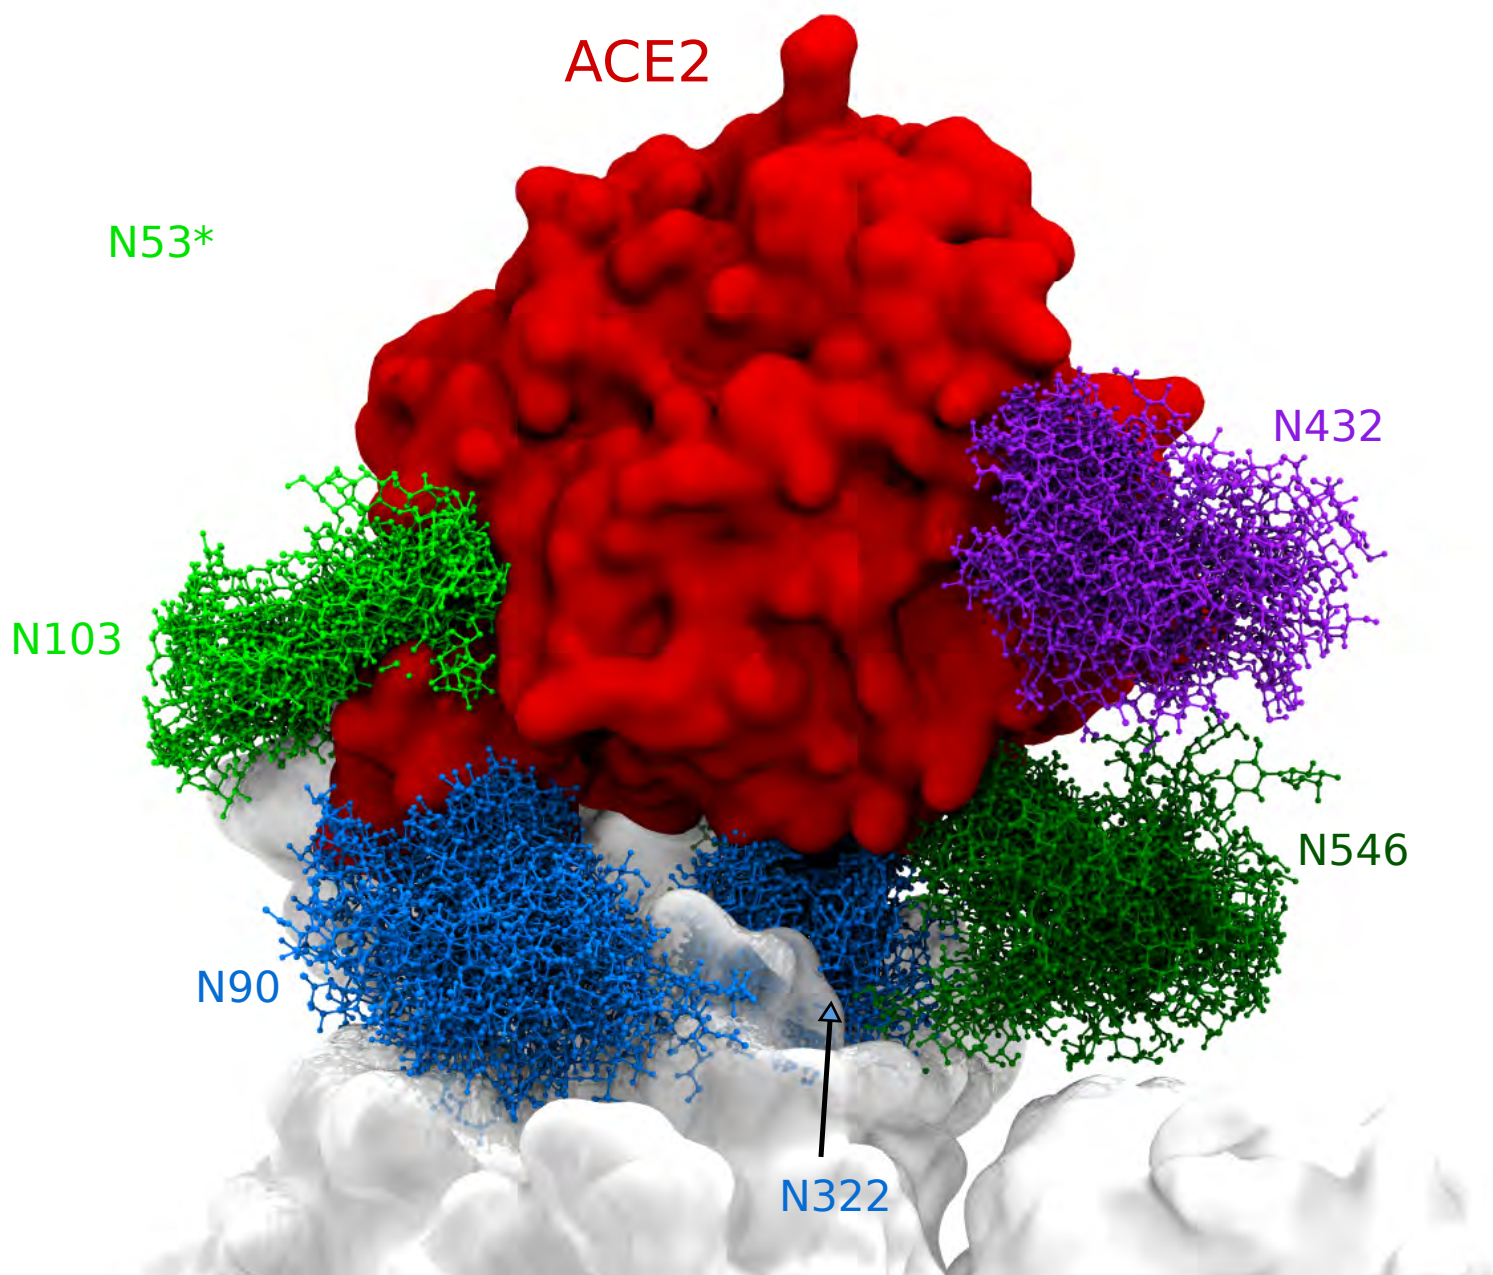



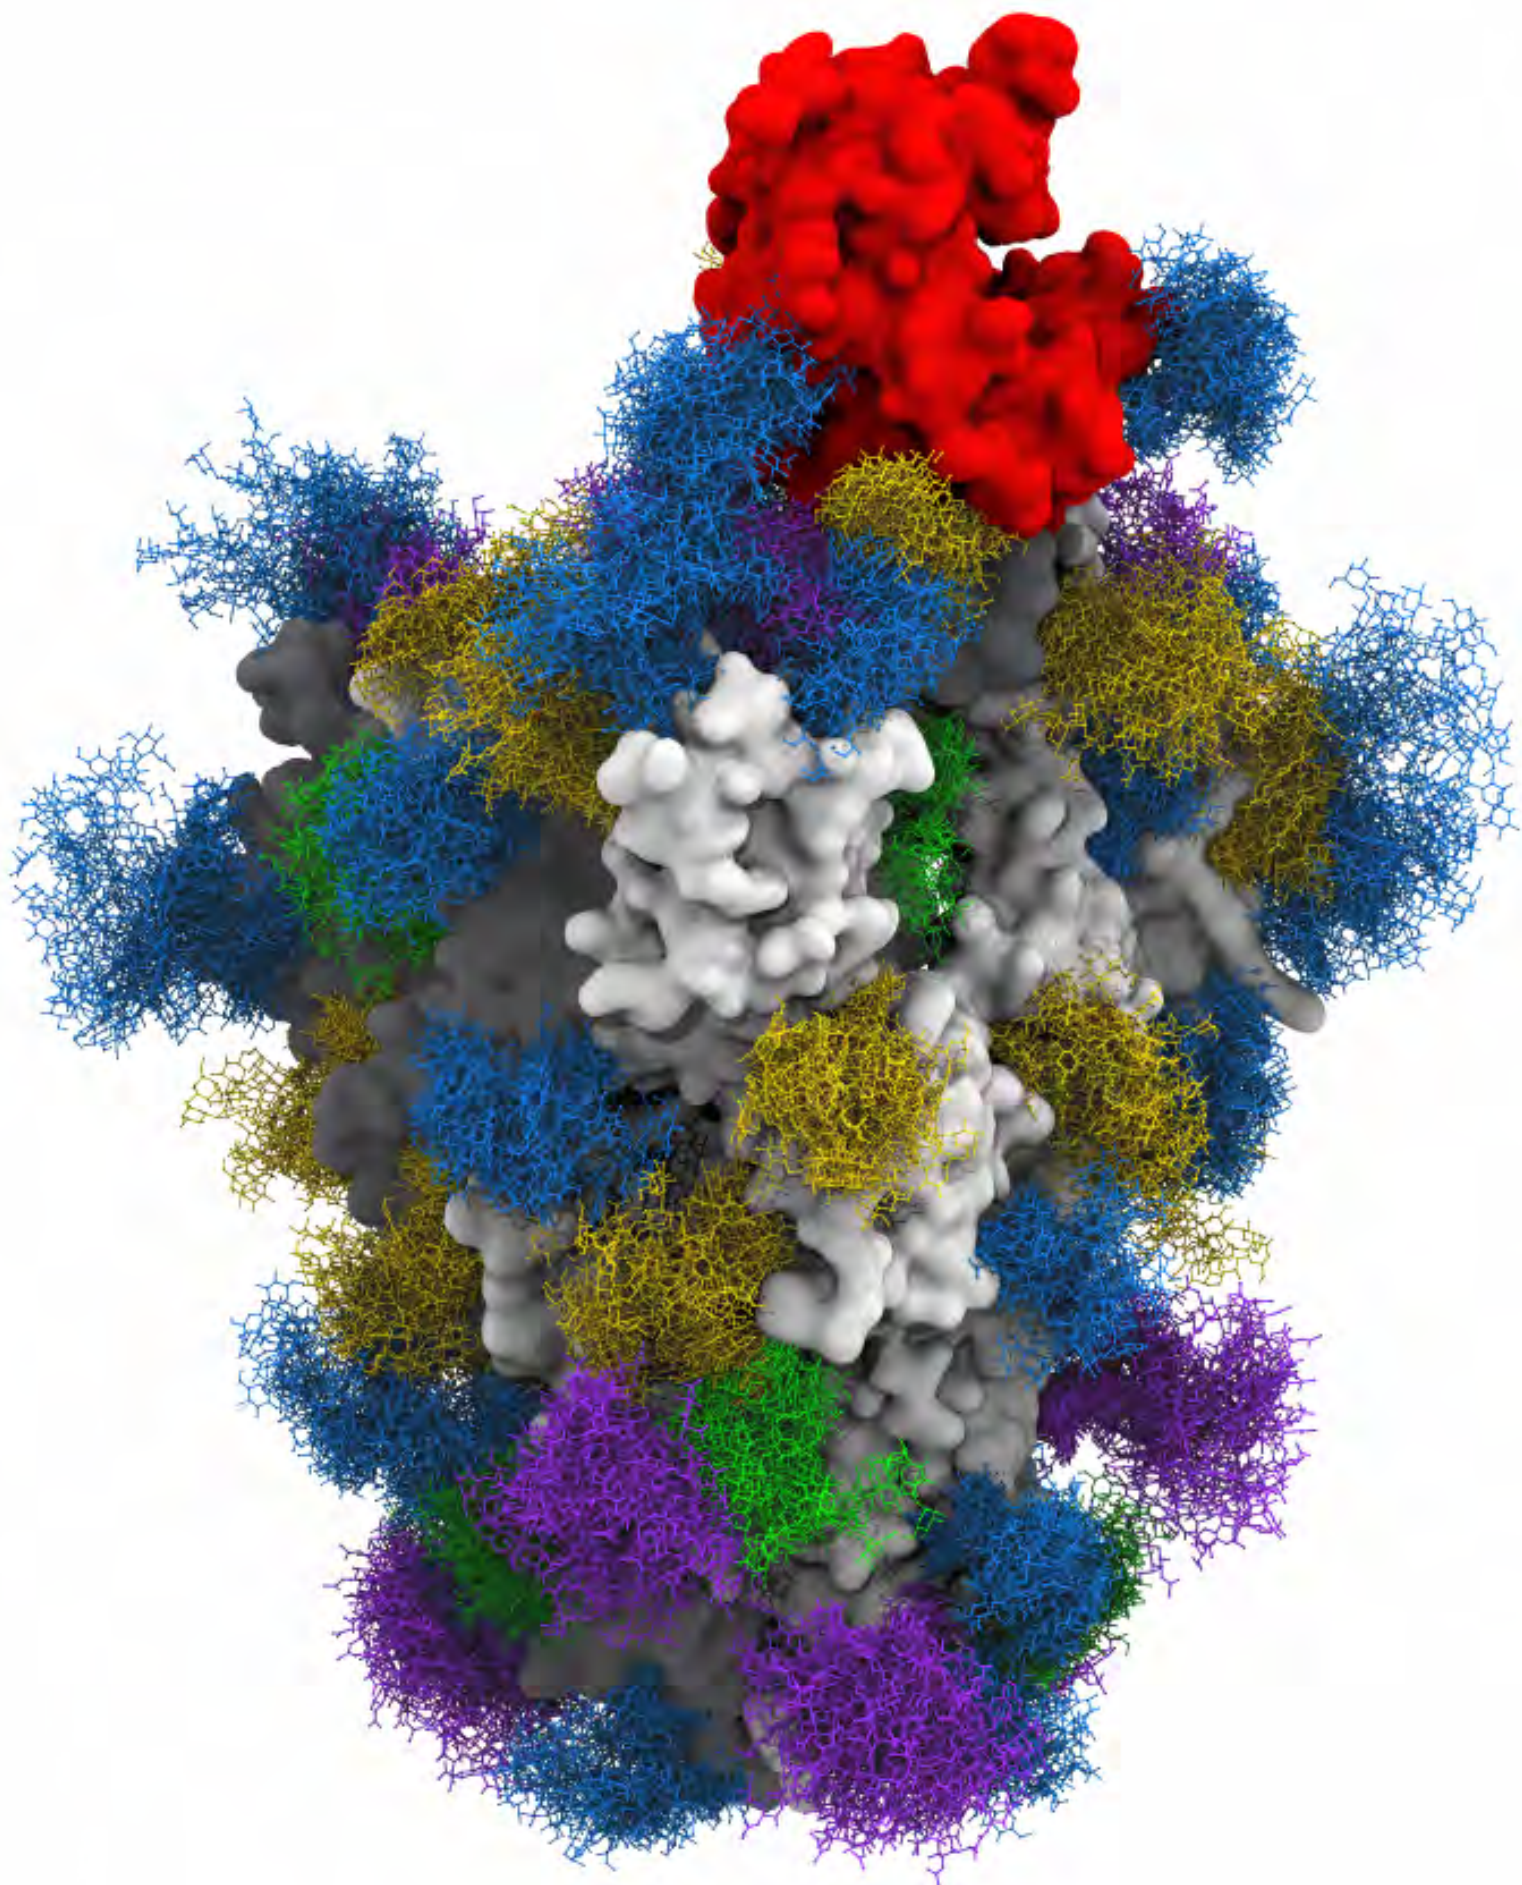

Source: https://www.biorxiv.org/content/10.1101/2020.06.25.172403v1.full.pdf
