# Supplementary material for: Virus-Receptor Interactions of Glycosylated SARS-CoV-2 Spike and Human ACE2 Receptor
Source: bioRxiv or medRxiv preprint supplement (doi:10.1101/2020.06.25.172403), 2020-07-24

Peptide (Pep):  
Q(Pyro-Glu)STIEEQAK  
MH<sup>2+</sup> = m/z 508.7506  
 $\Delta M = 4.23$  ppm

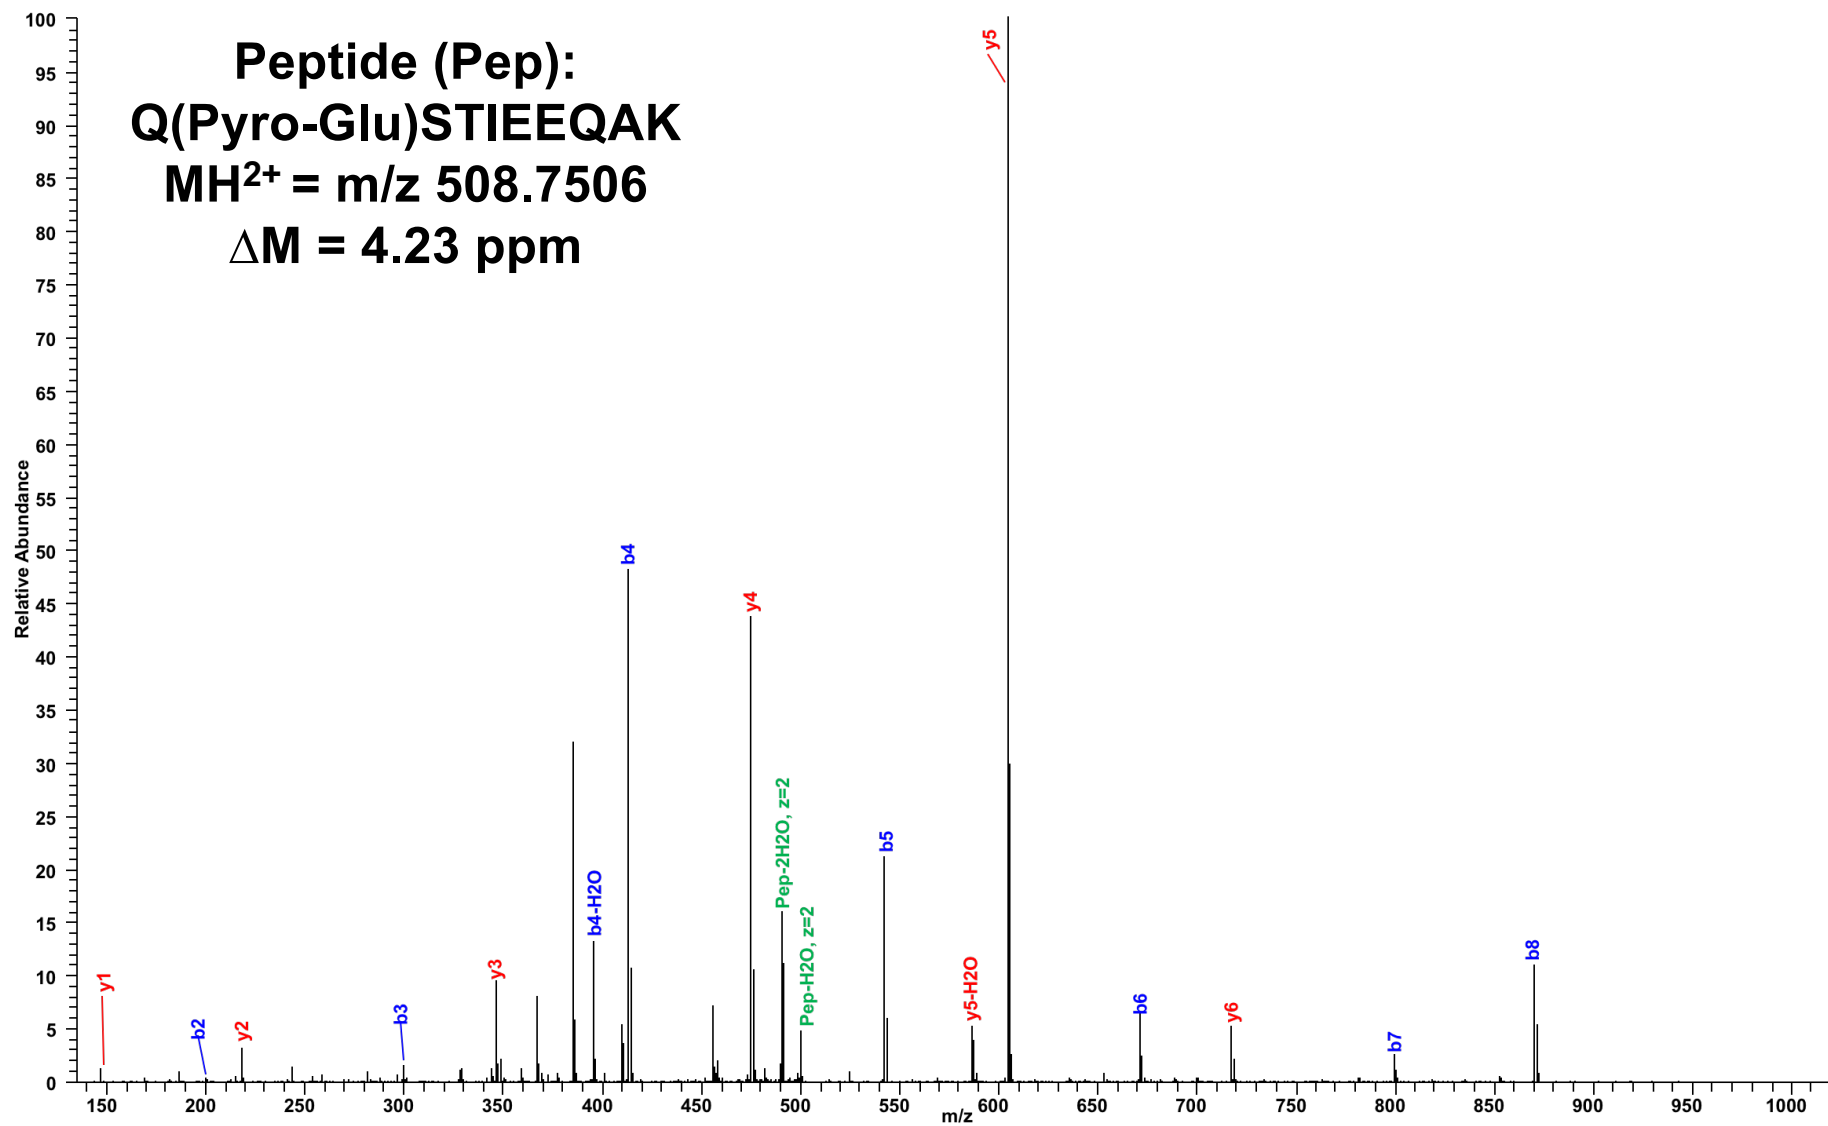

Pep1: Q(Pyro-Glu)C(Disulfide)VN(Deamidated)LTTR

Pep2: FQFC(Disulfide)NDPFLGVYYHK

MH<sup>4+</sup> = m/z 699.0799

$\Delta M = 6.36$  ppm

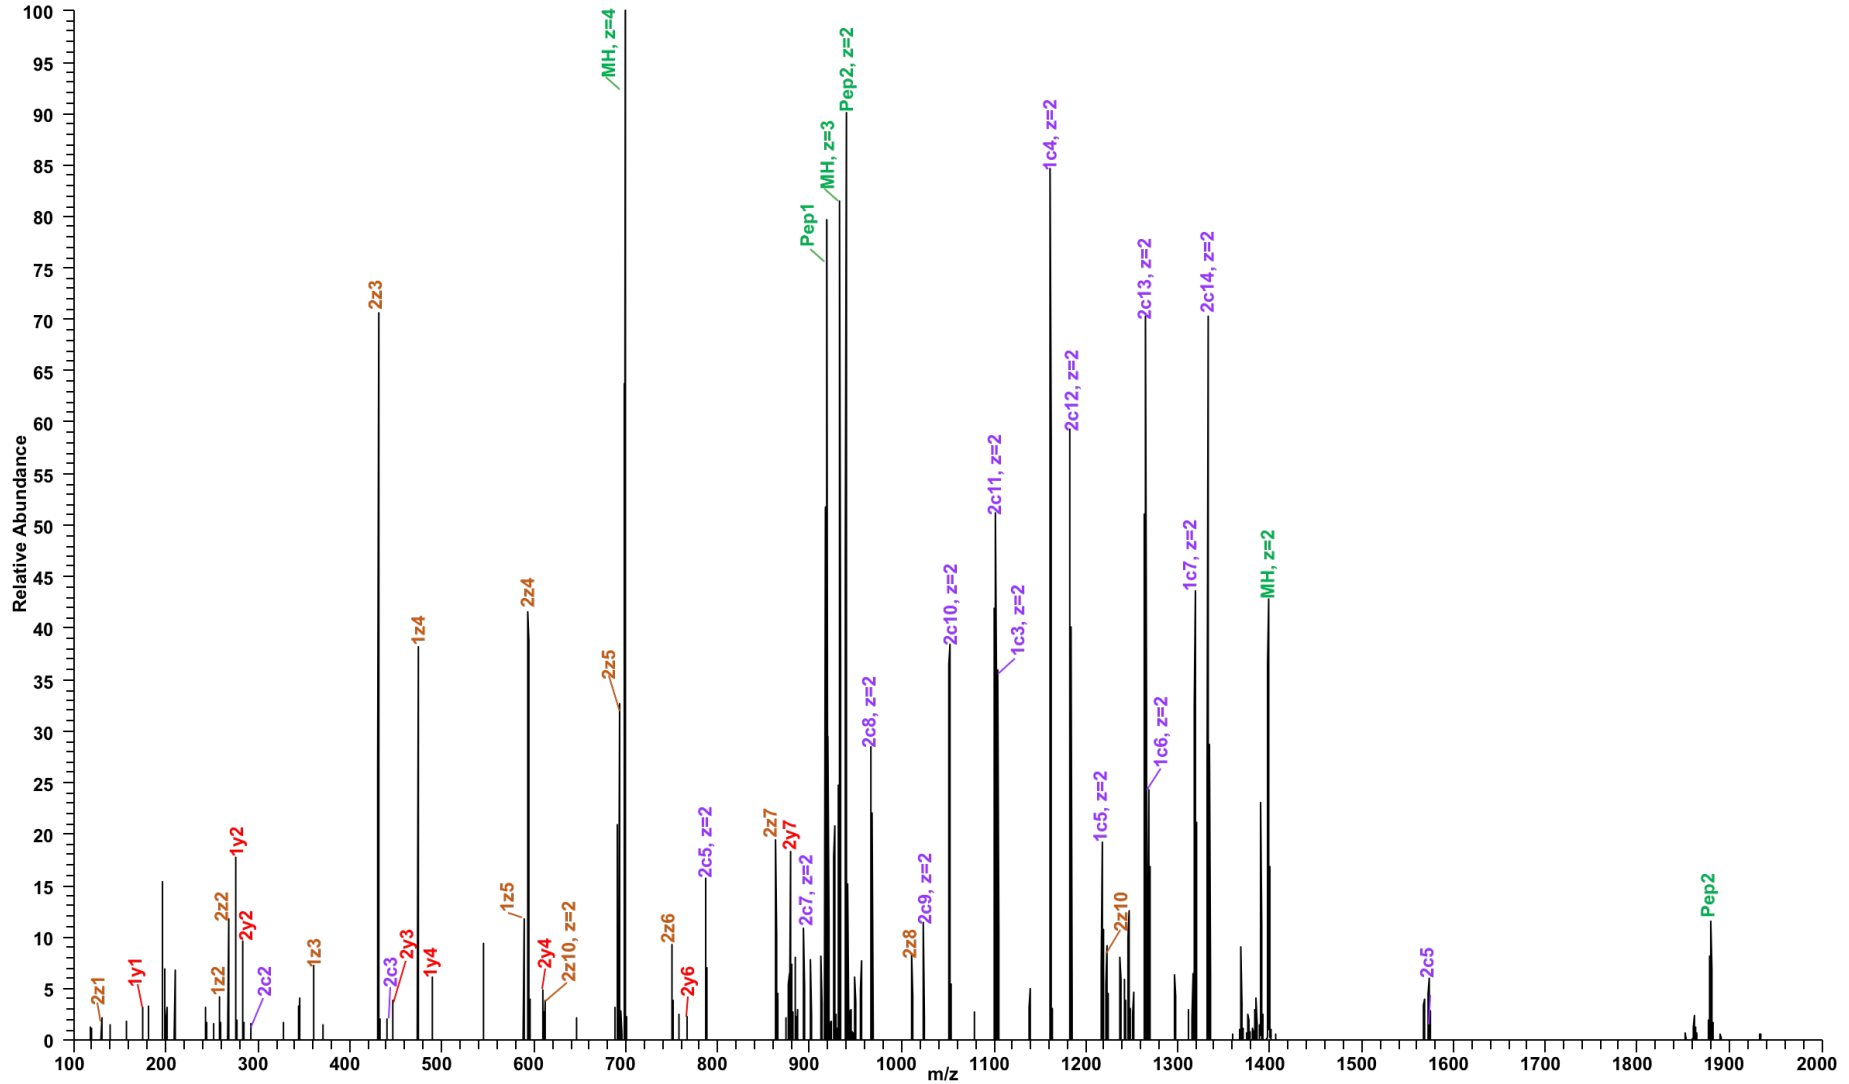

- **Utilized Start Met: MFVFLVLLPLVSSQCVNL...**
  - Signal P: SSQC-VN (.54)

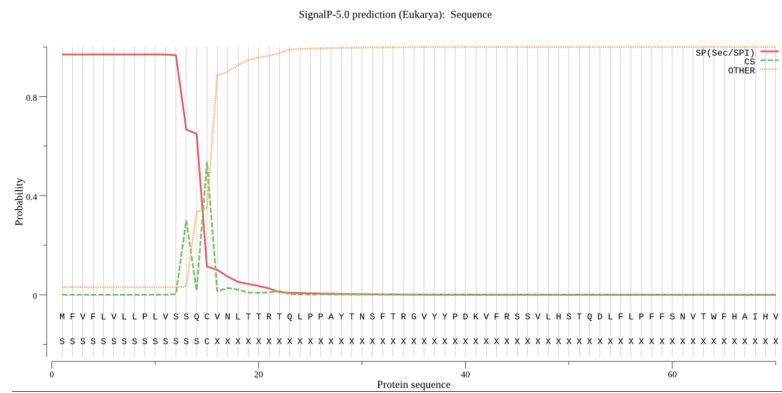

- **Upstream Met: MFLTTKRTMFVFLVLLPLVSSQCVNL...**
  - Signal P: SS-QCVN (.64)

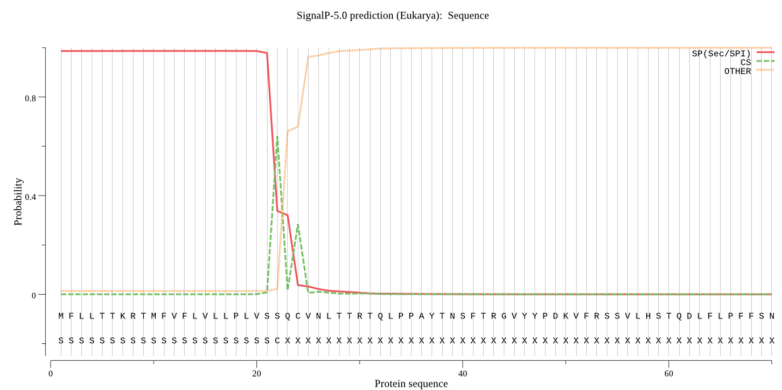

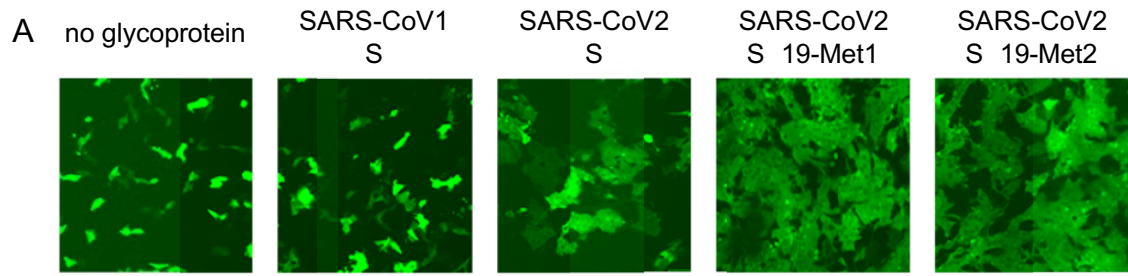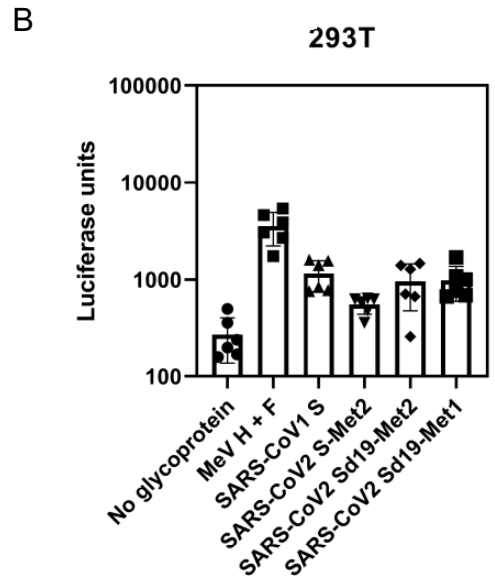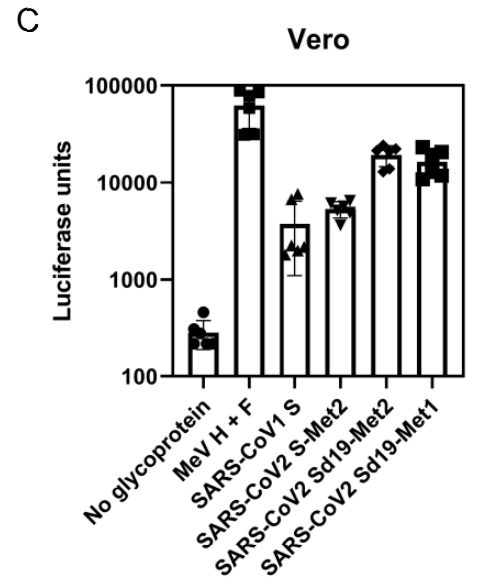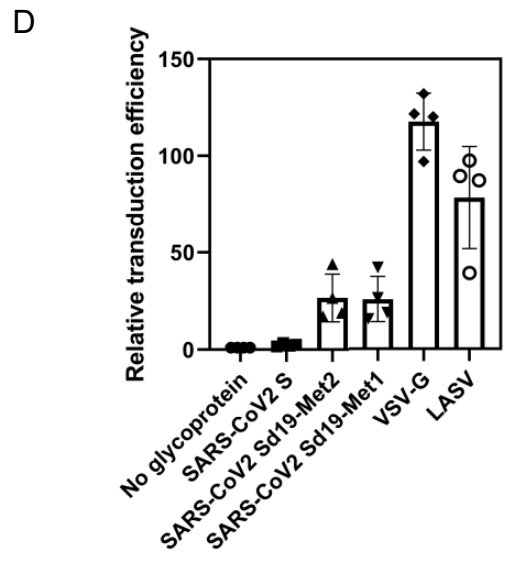

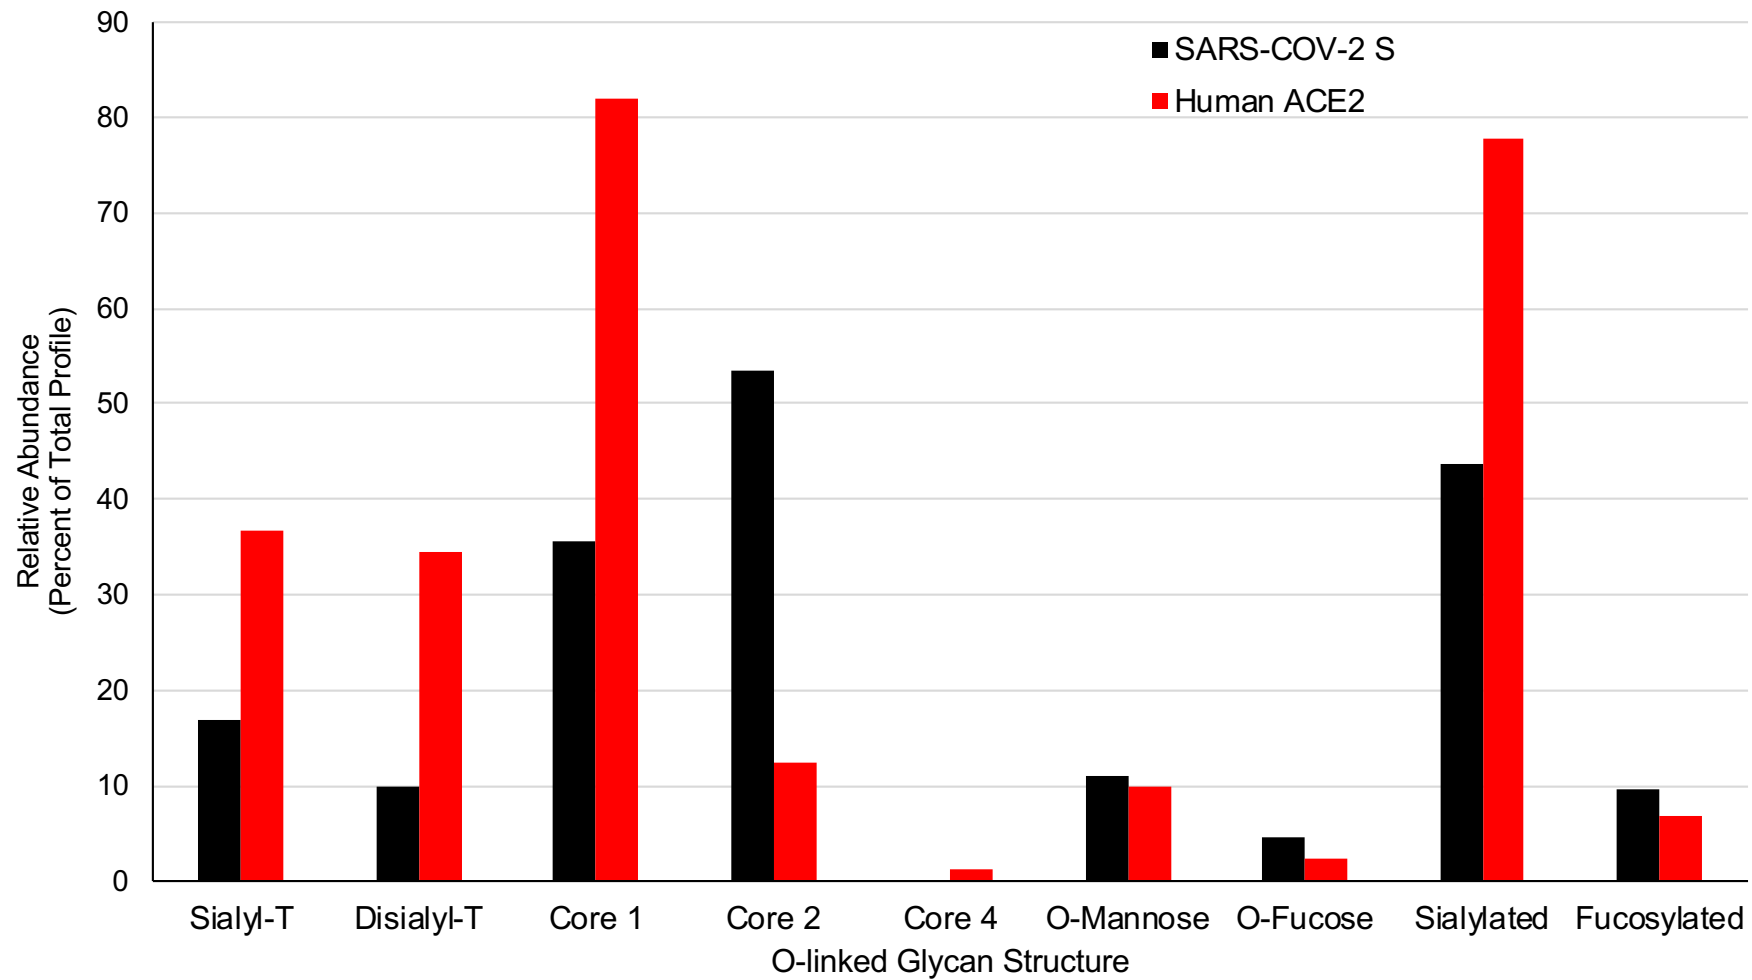

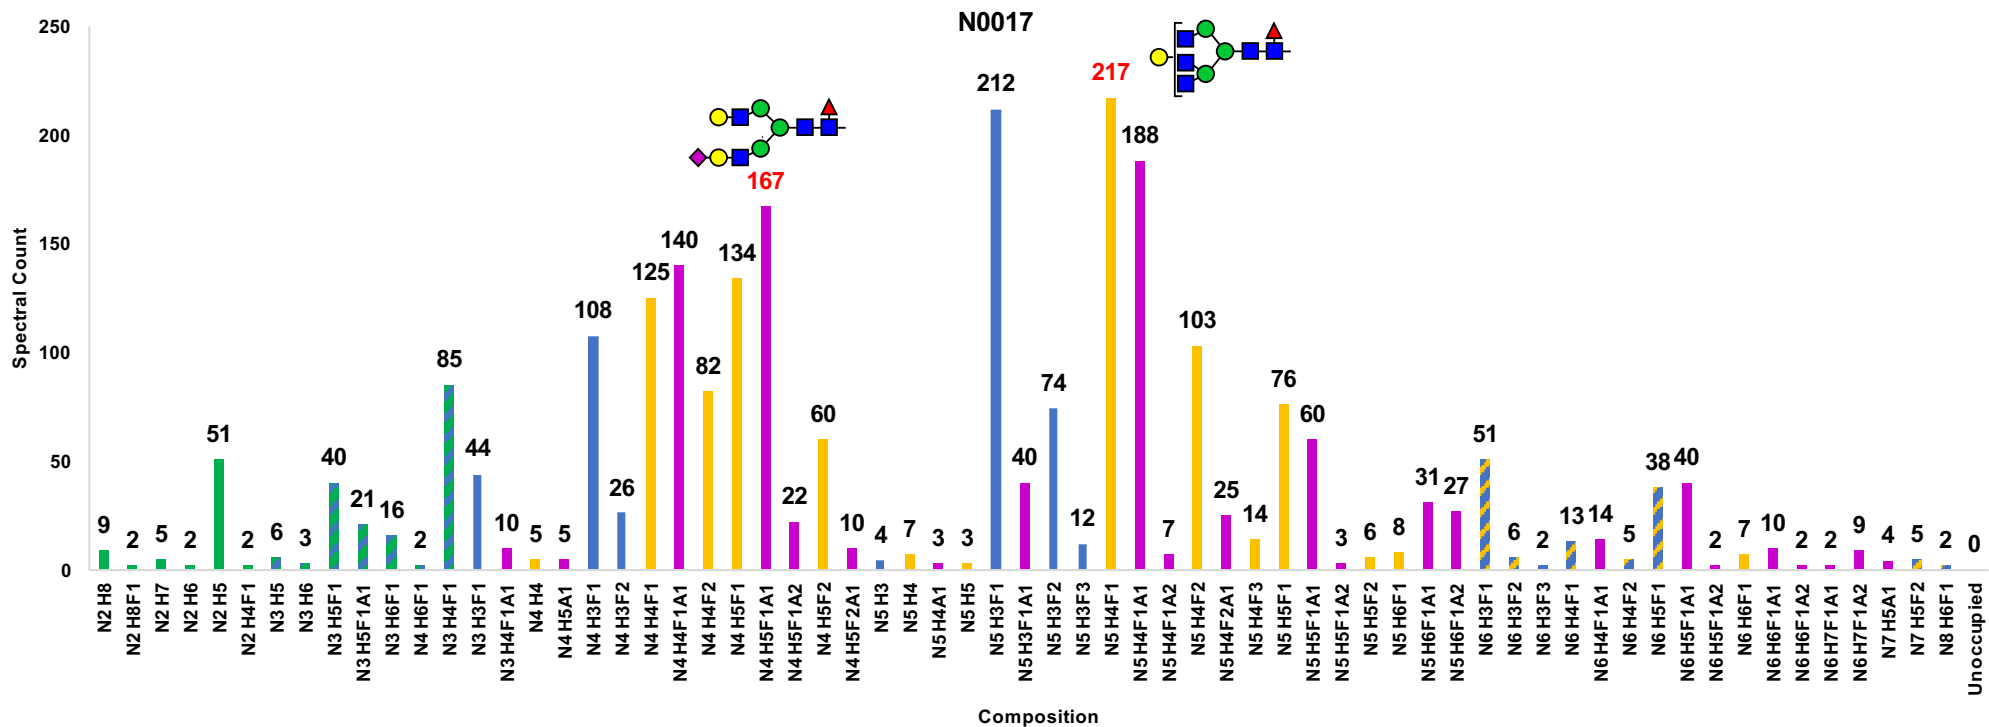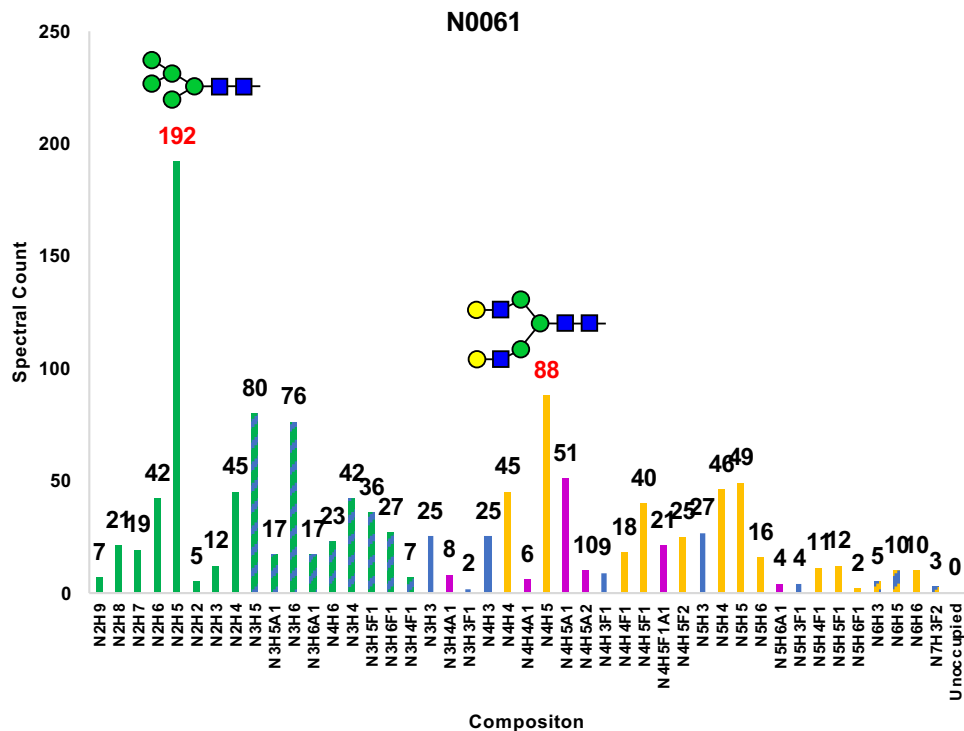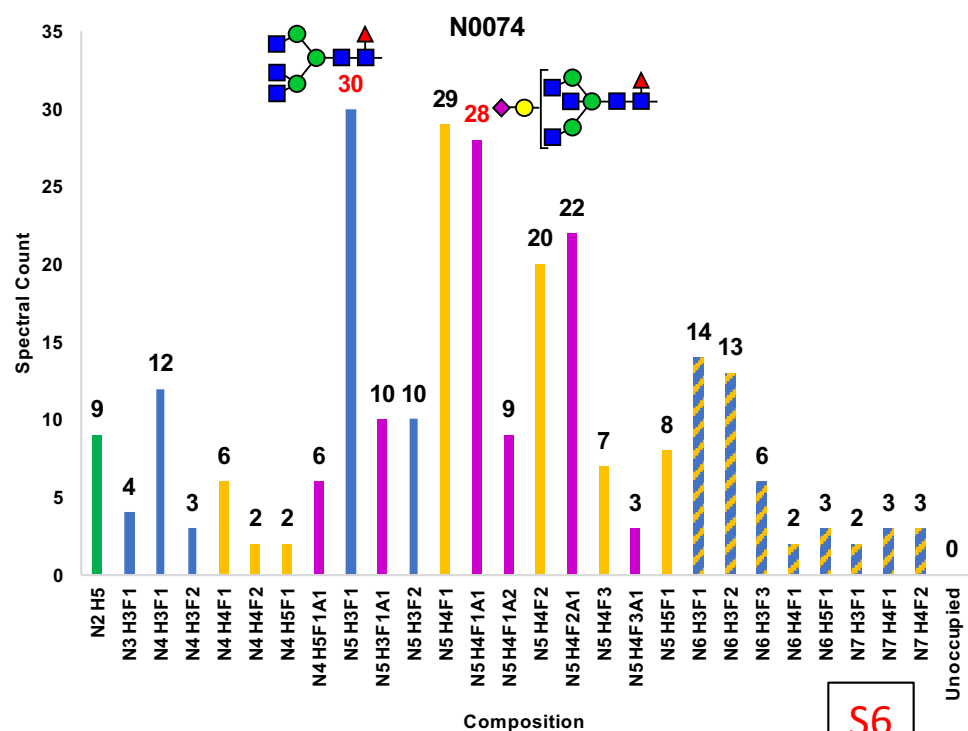

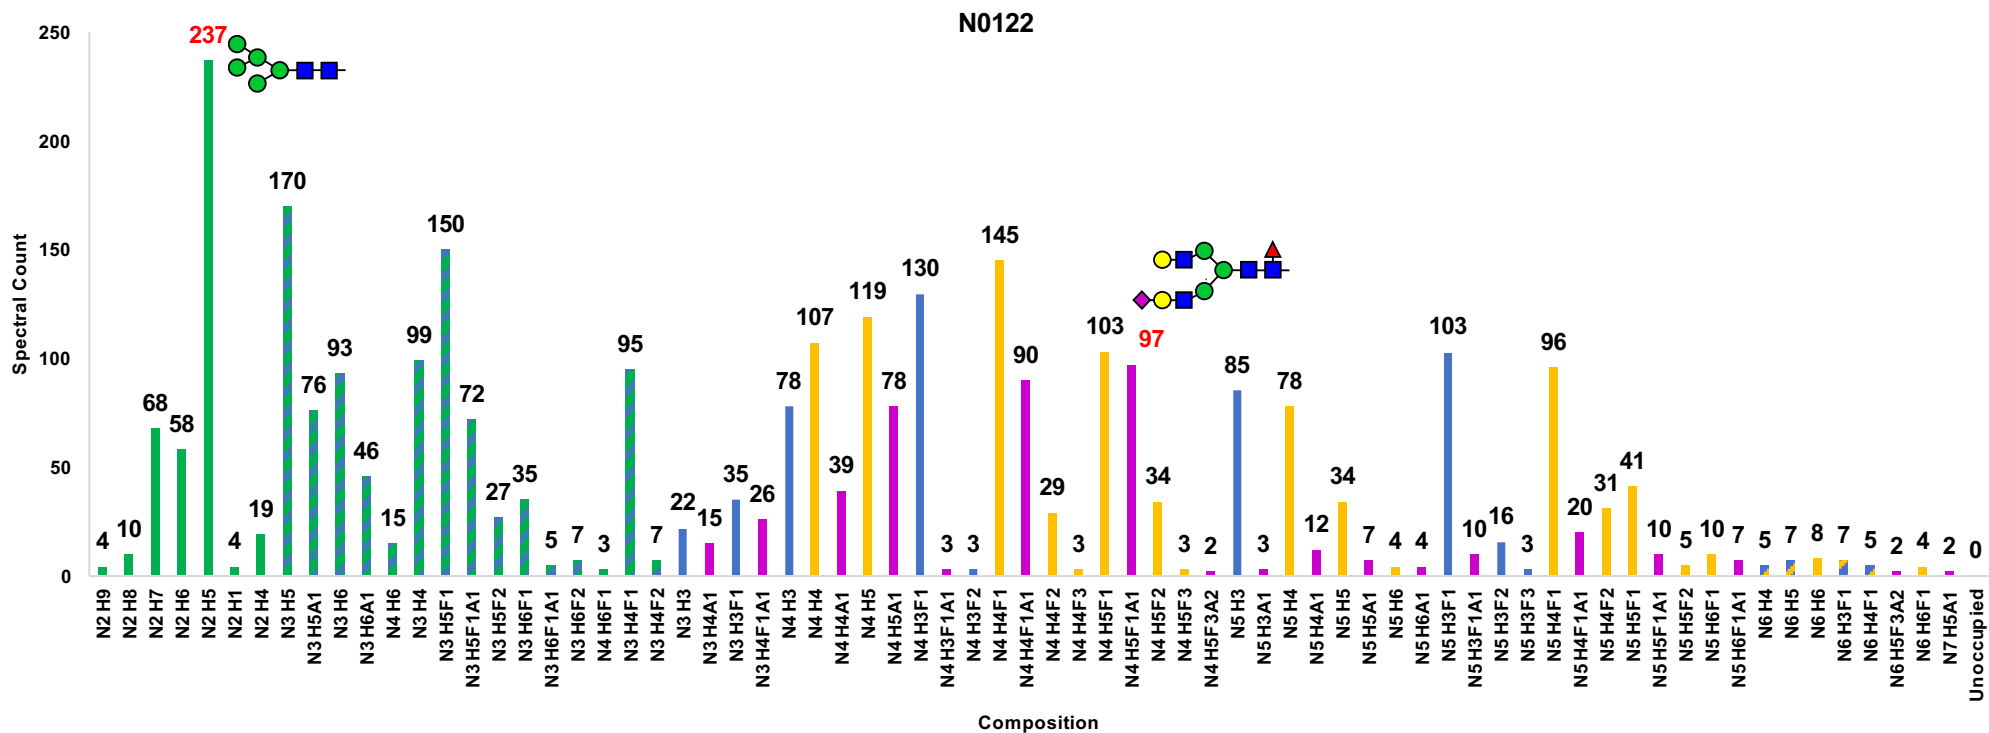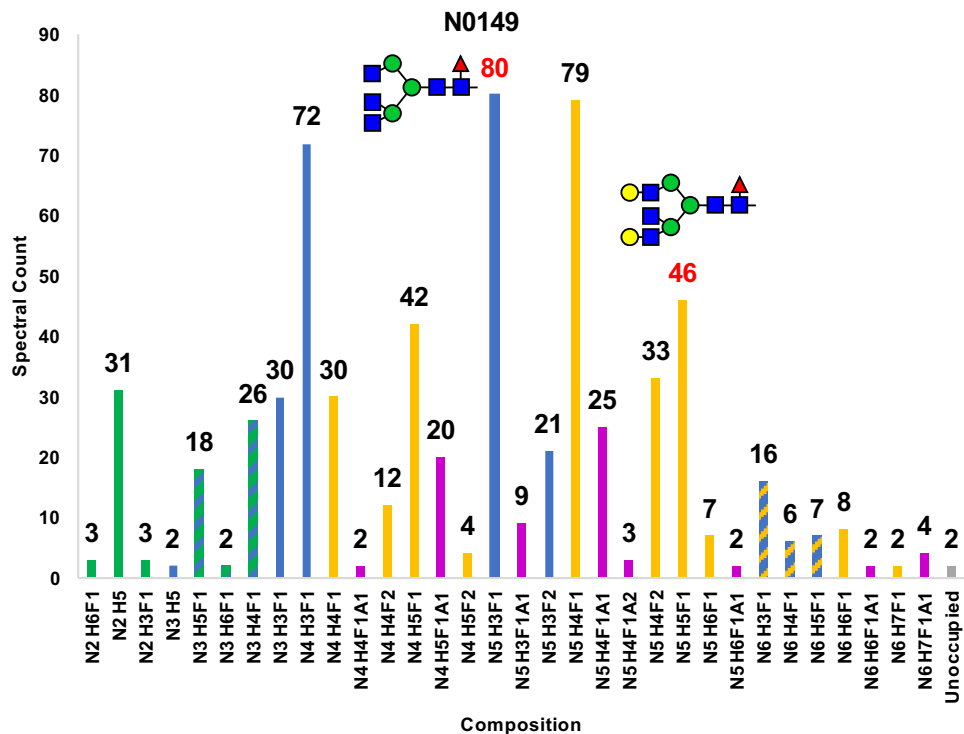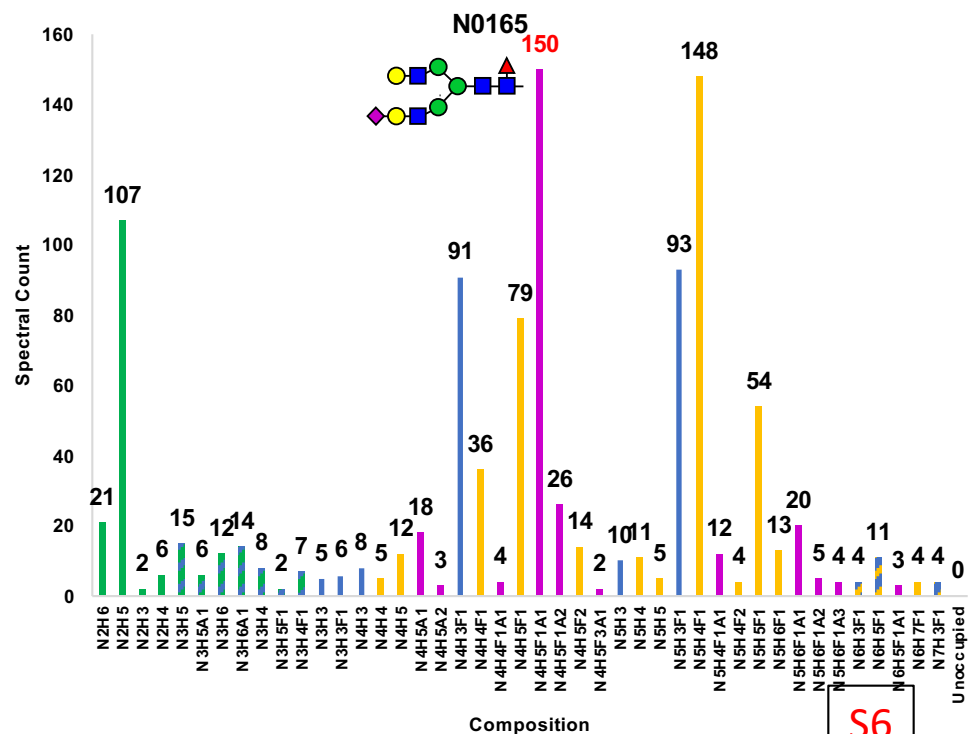

N0234

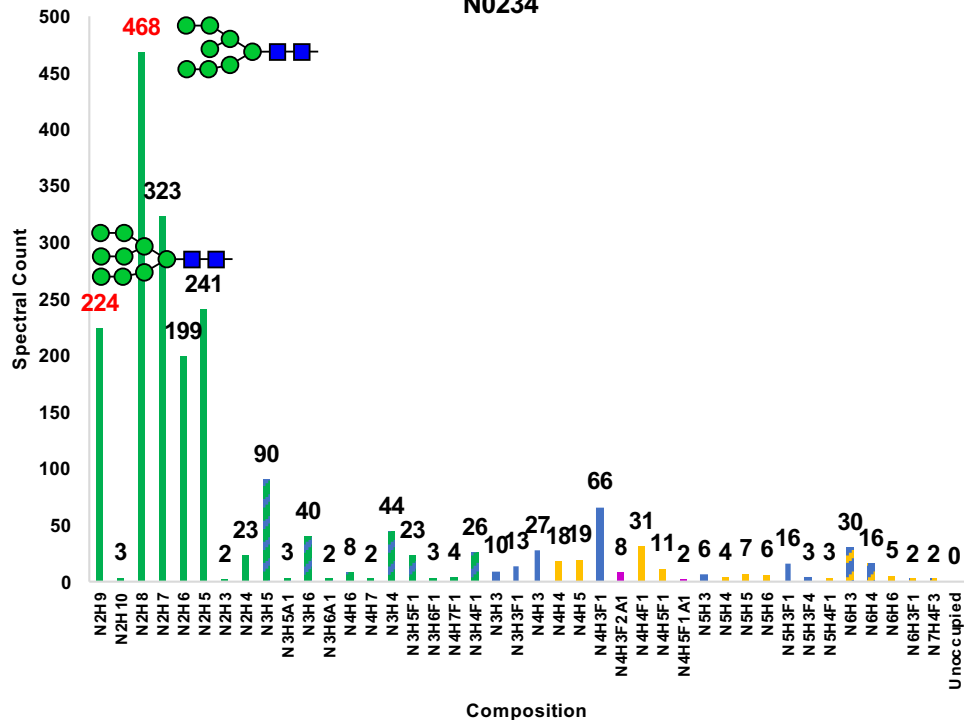

N0282

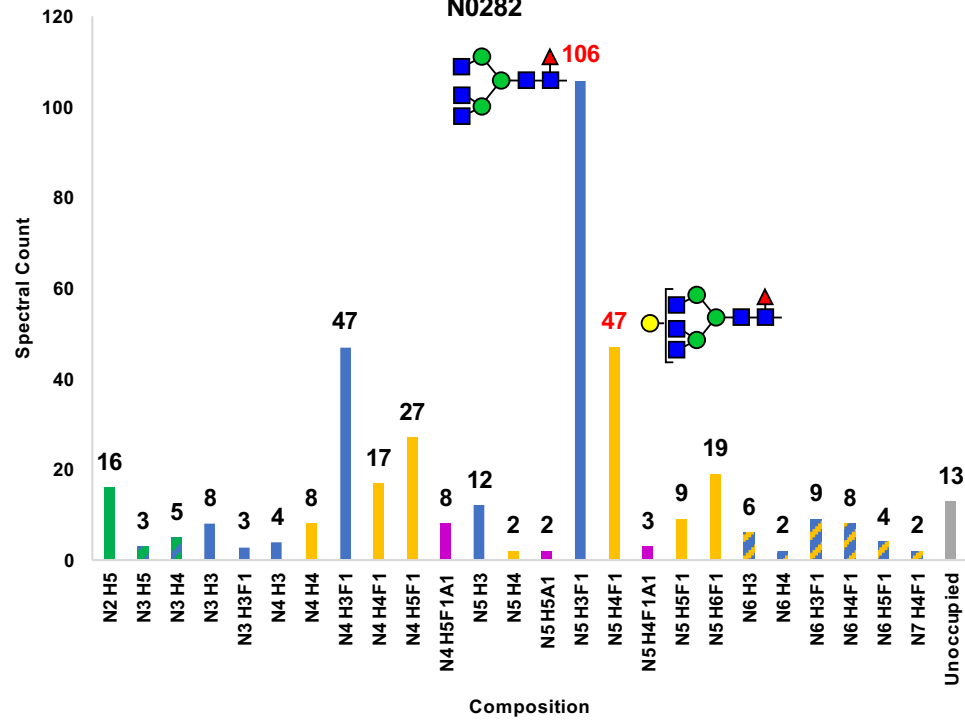

N0331

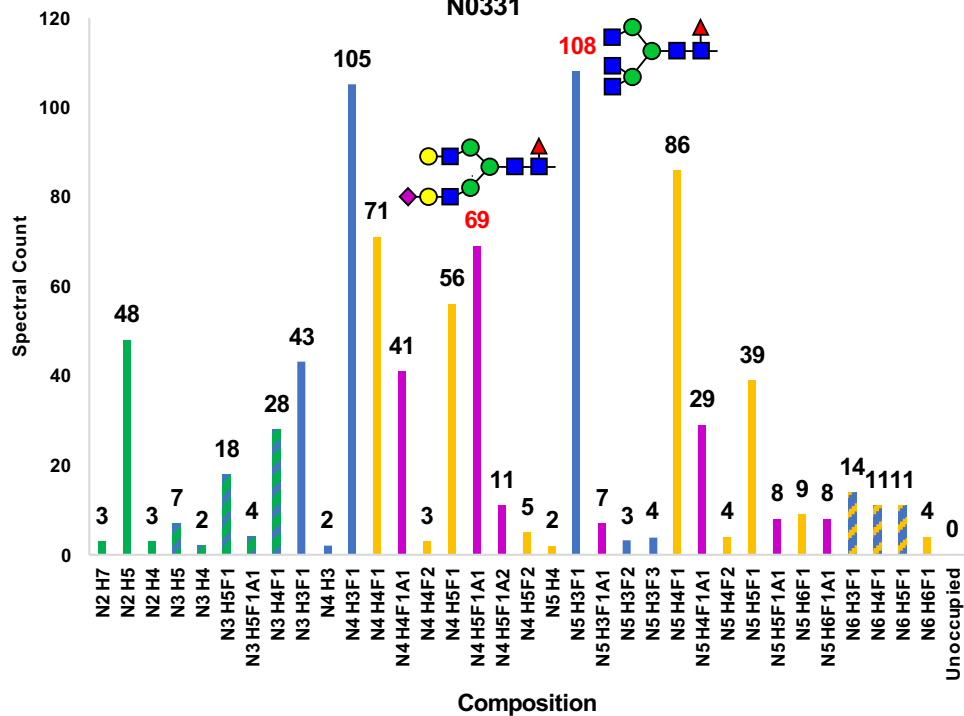

N0343

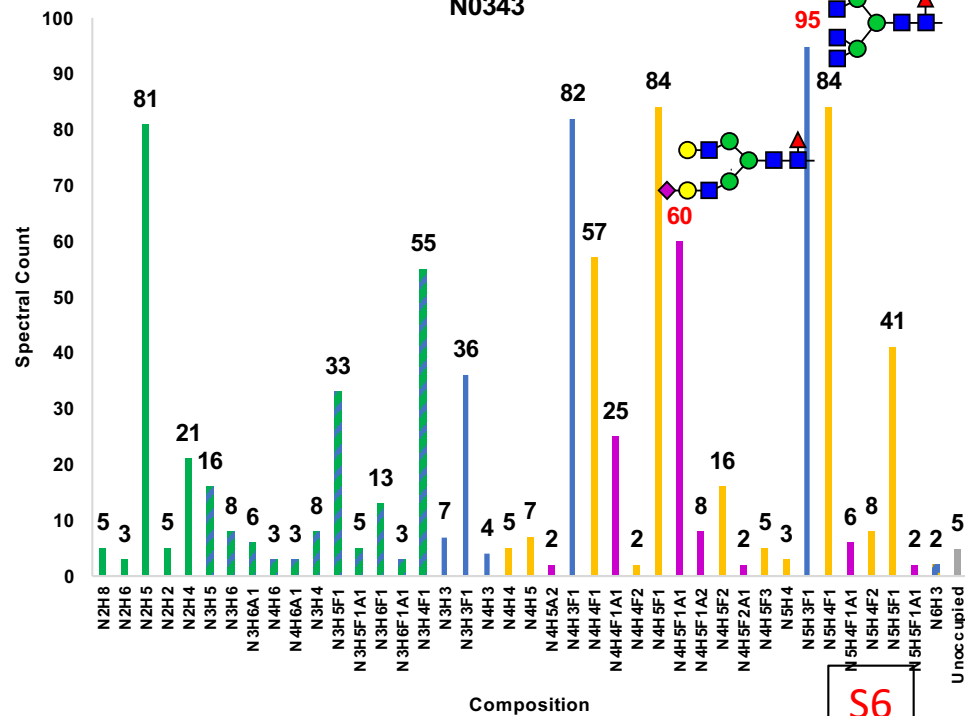

S6



N0603

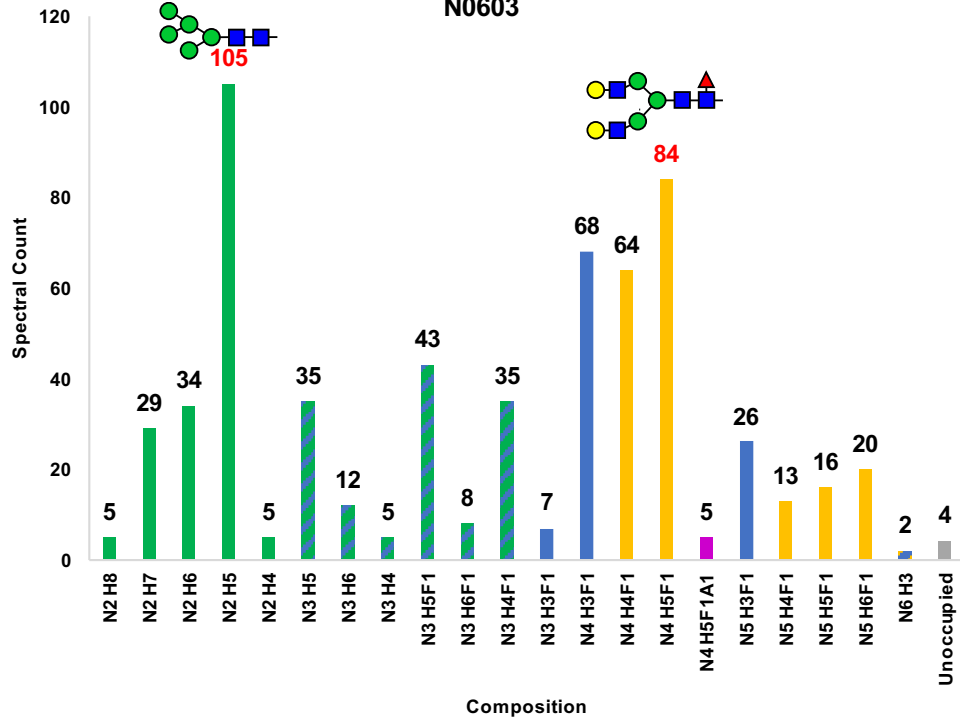

N0657

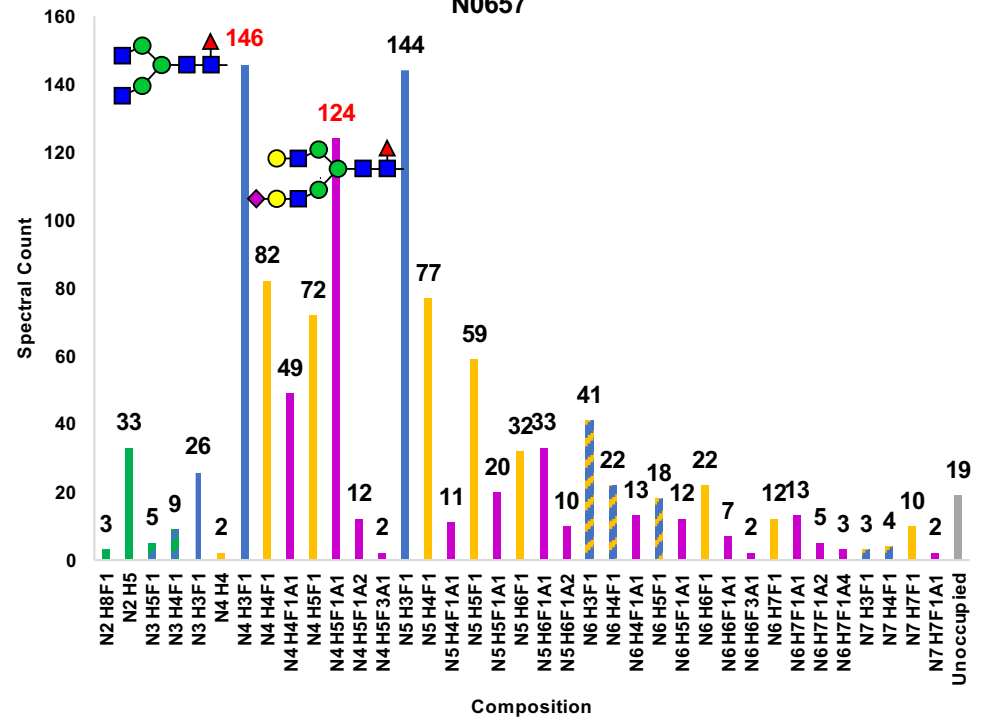

N0616

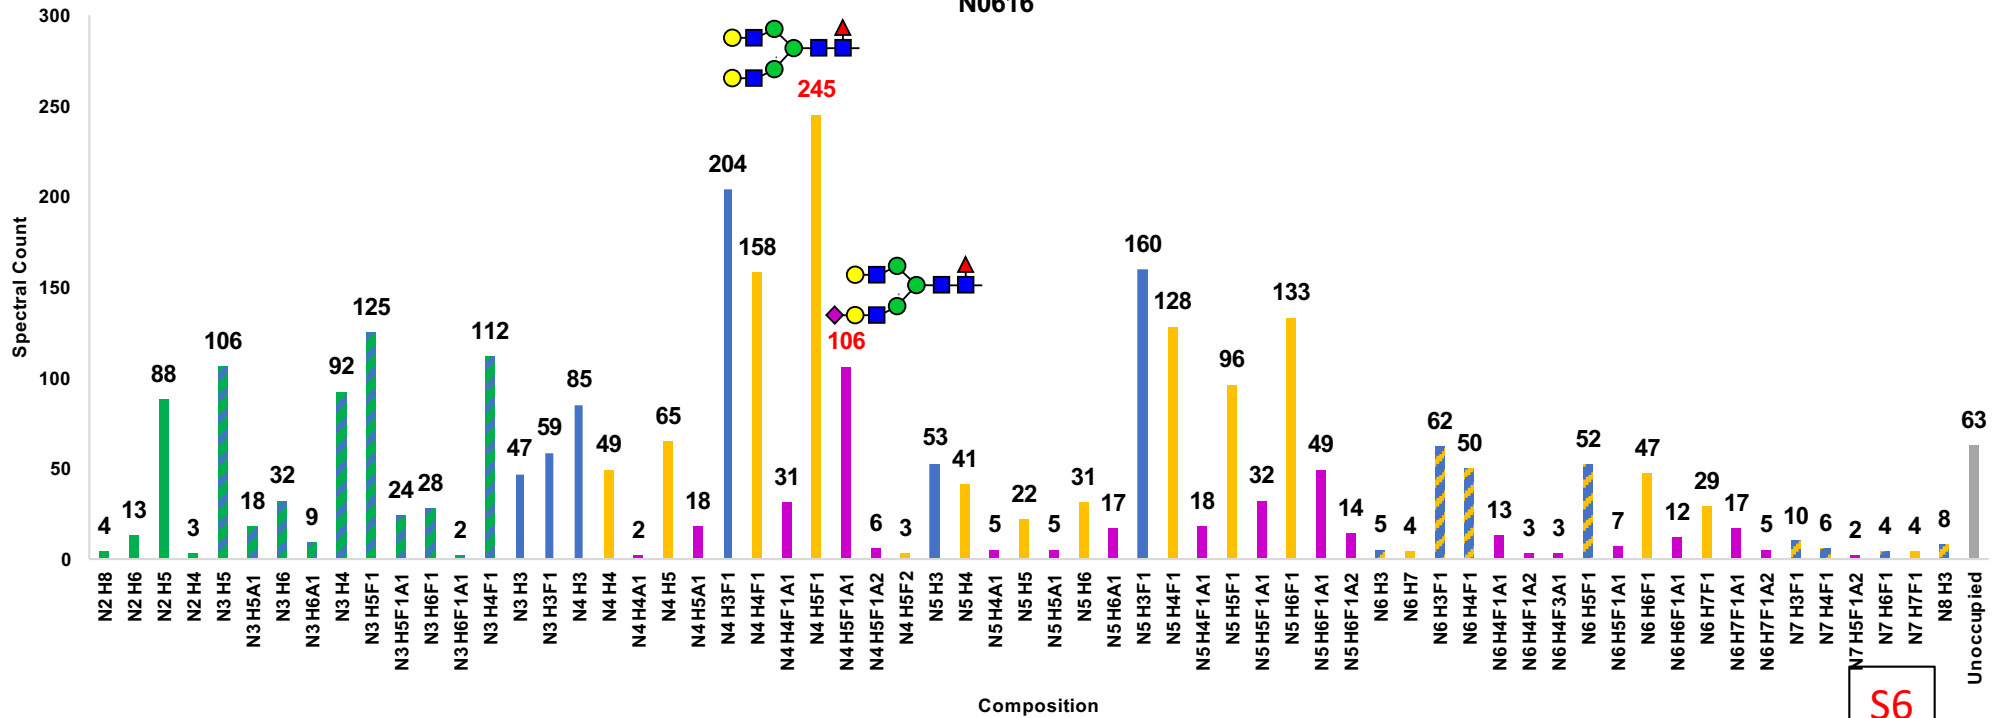

N0709

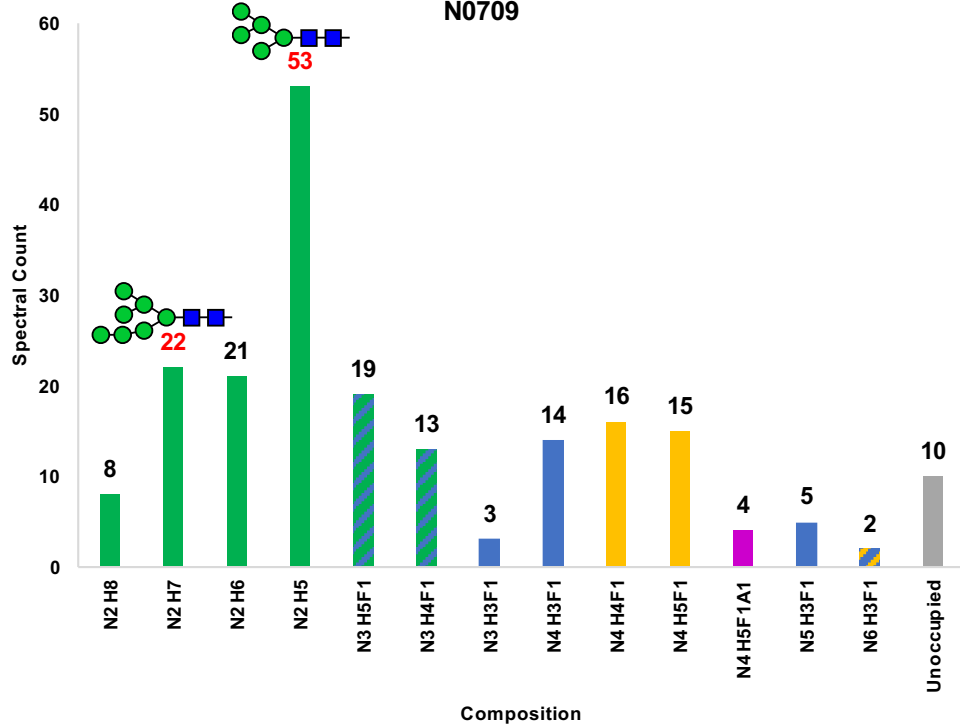

N0717

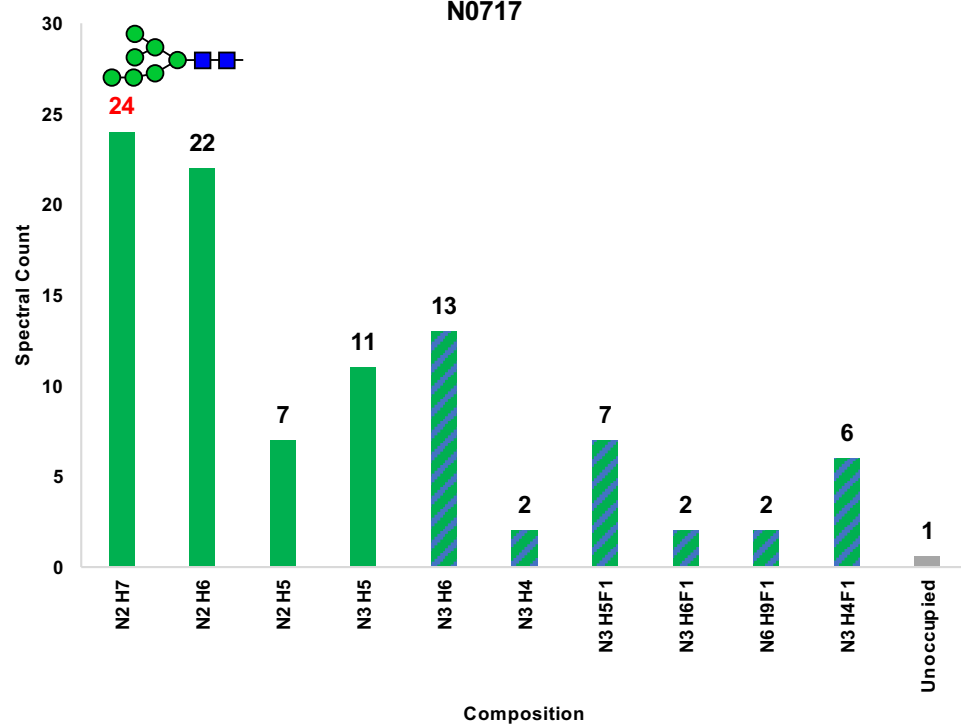

Composition

Composition

N0801

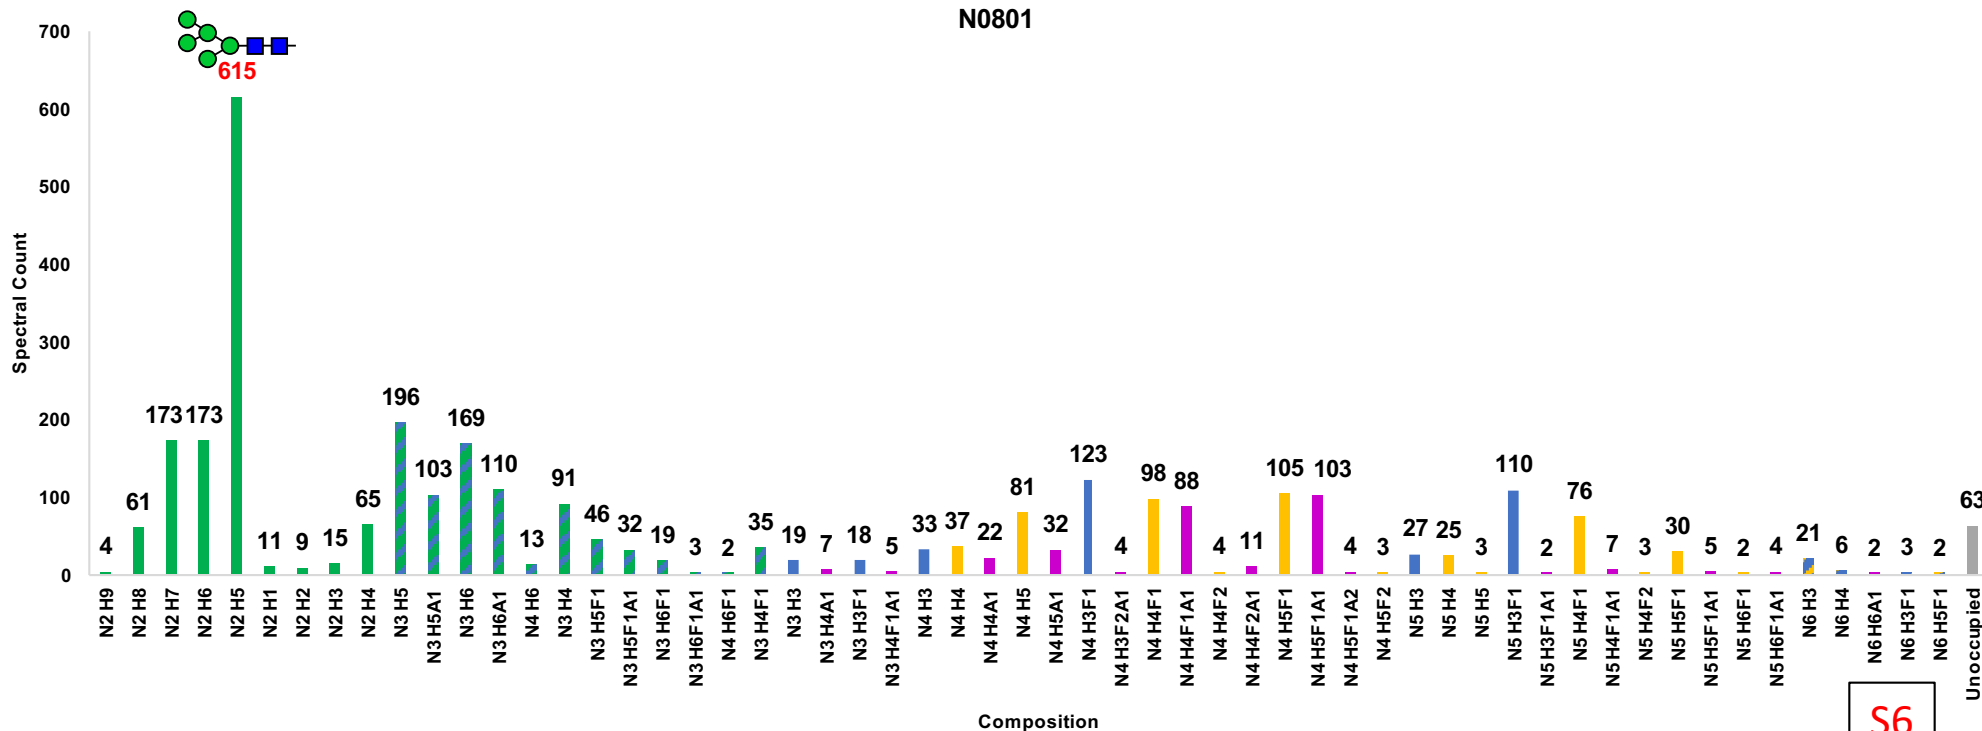

Composition

S6

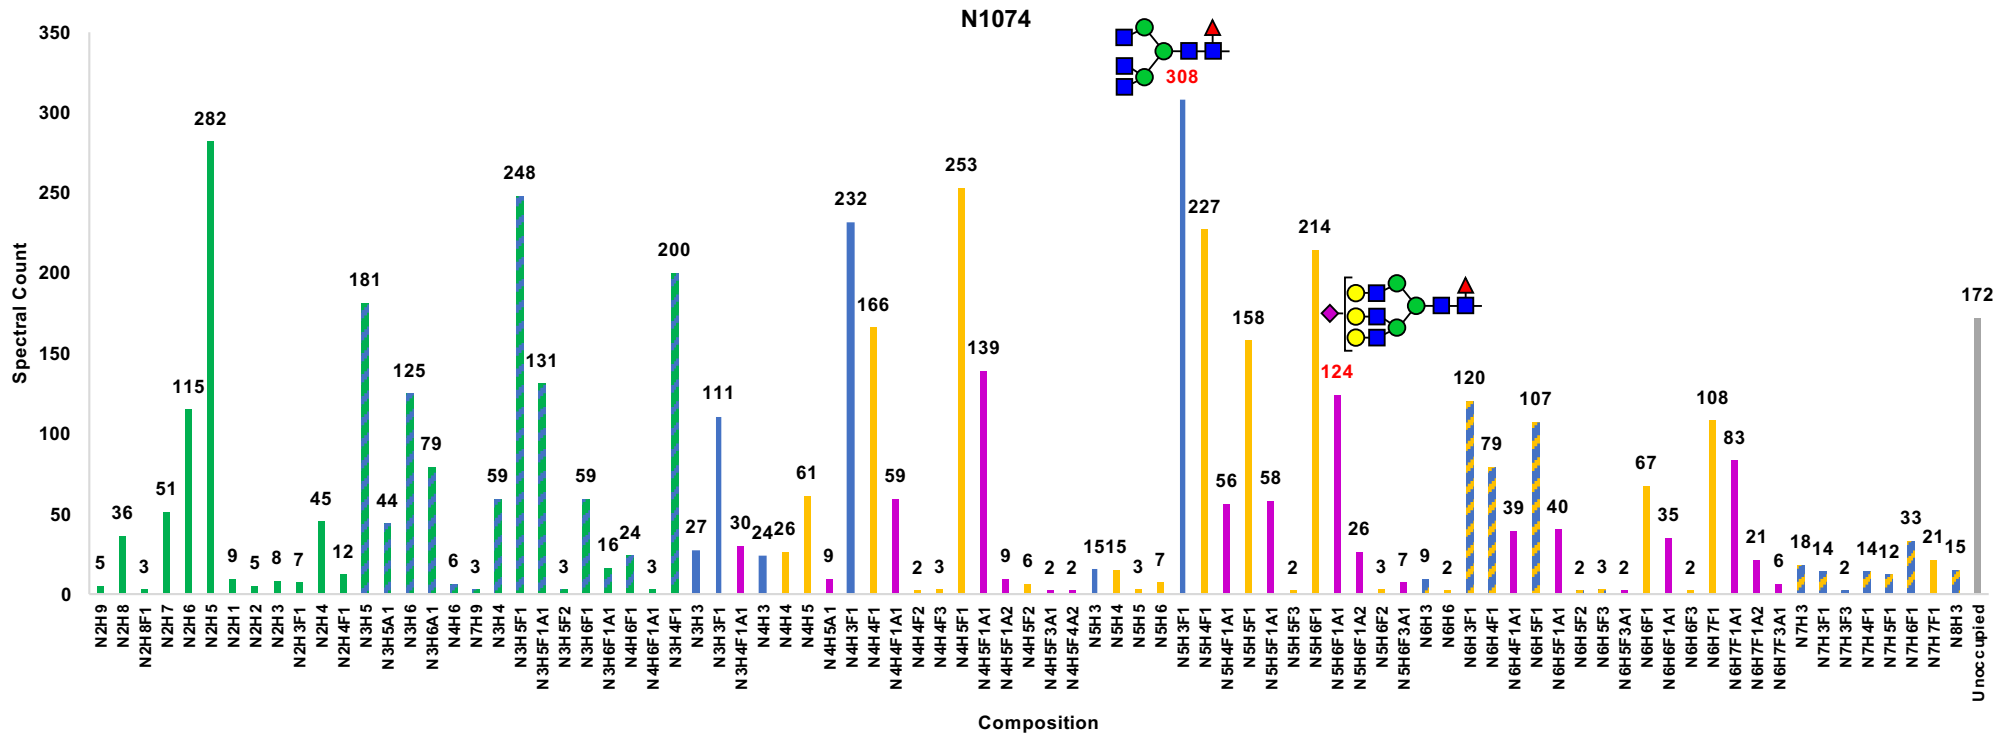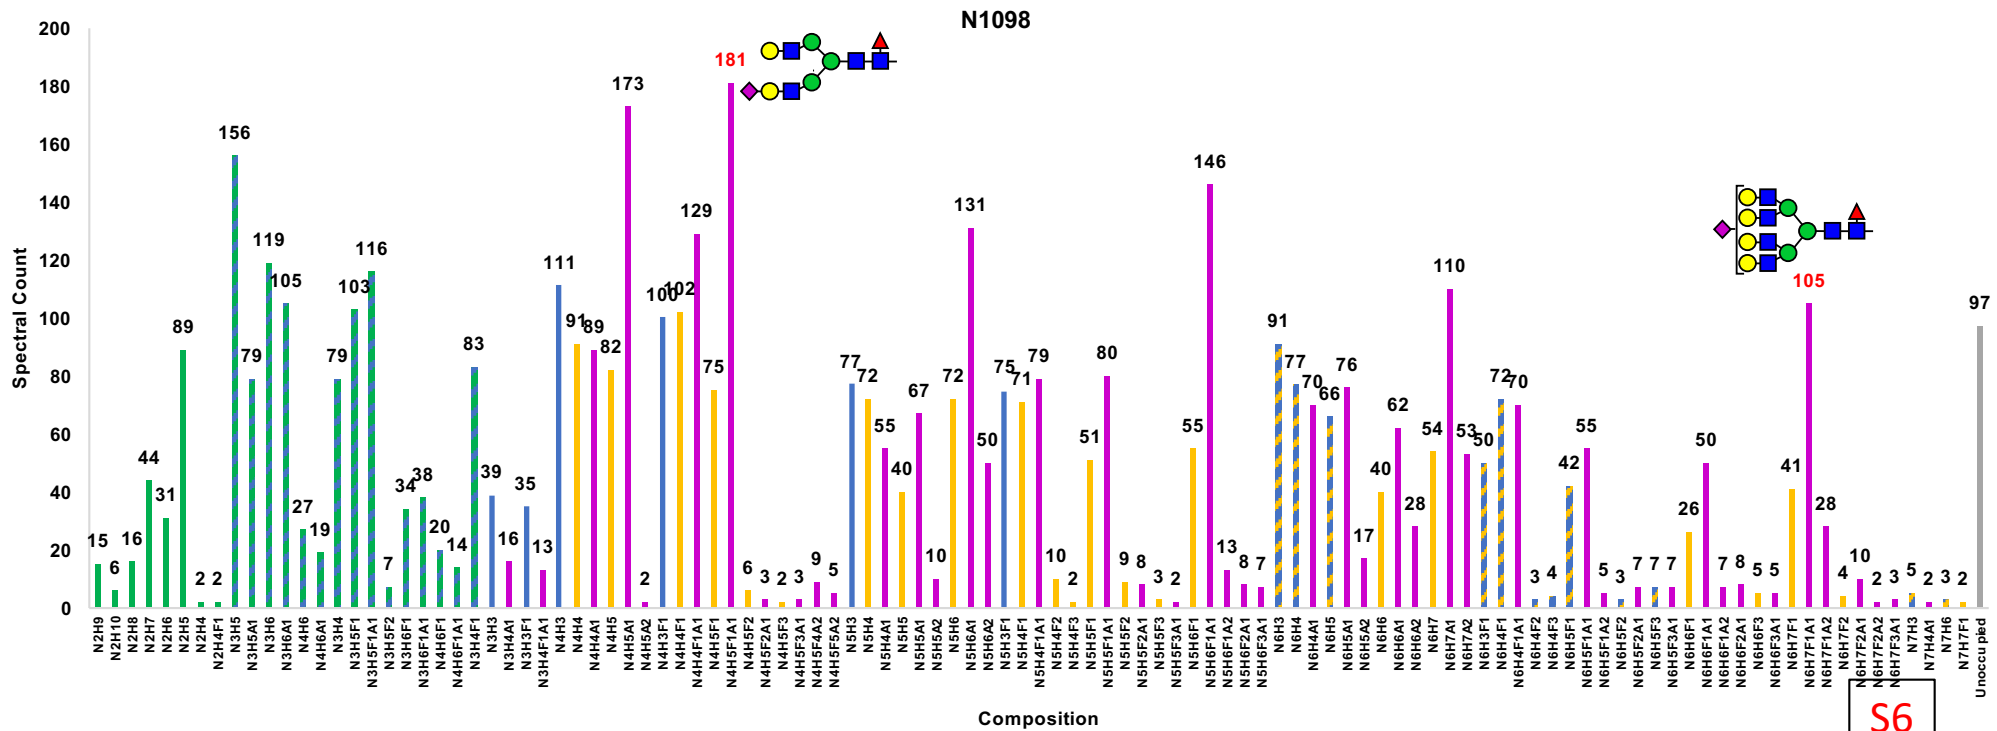

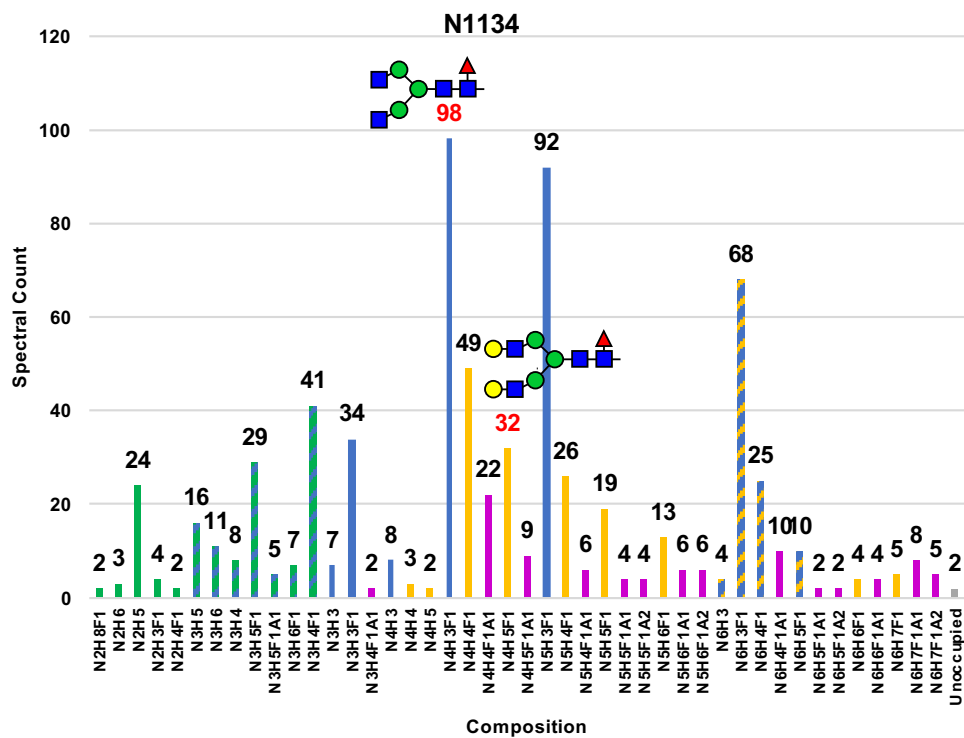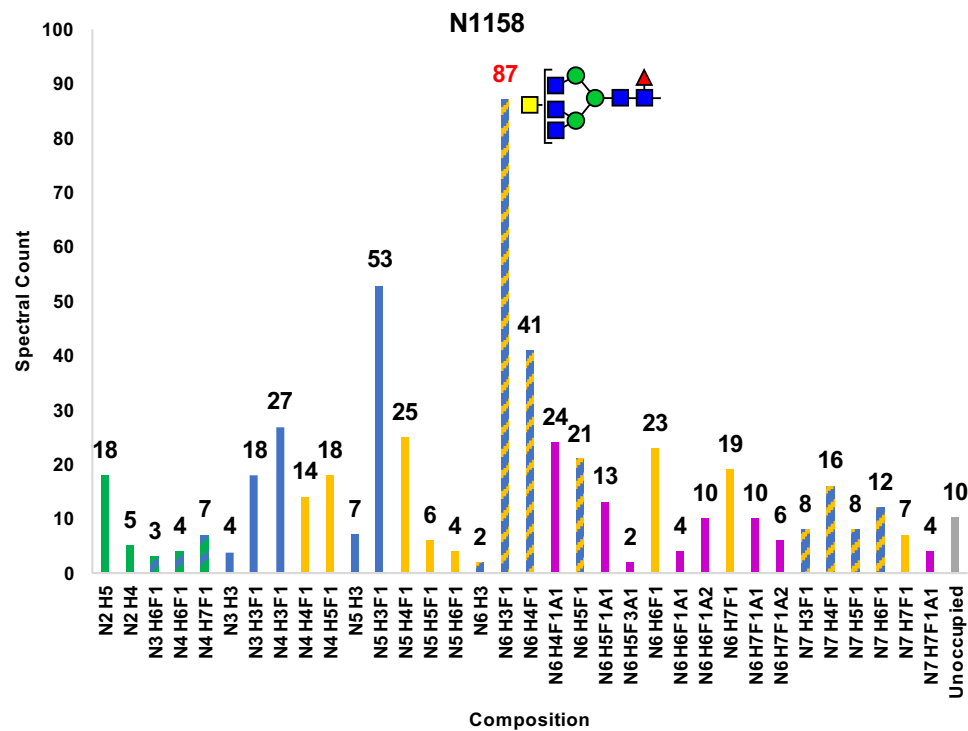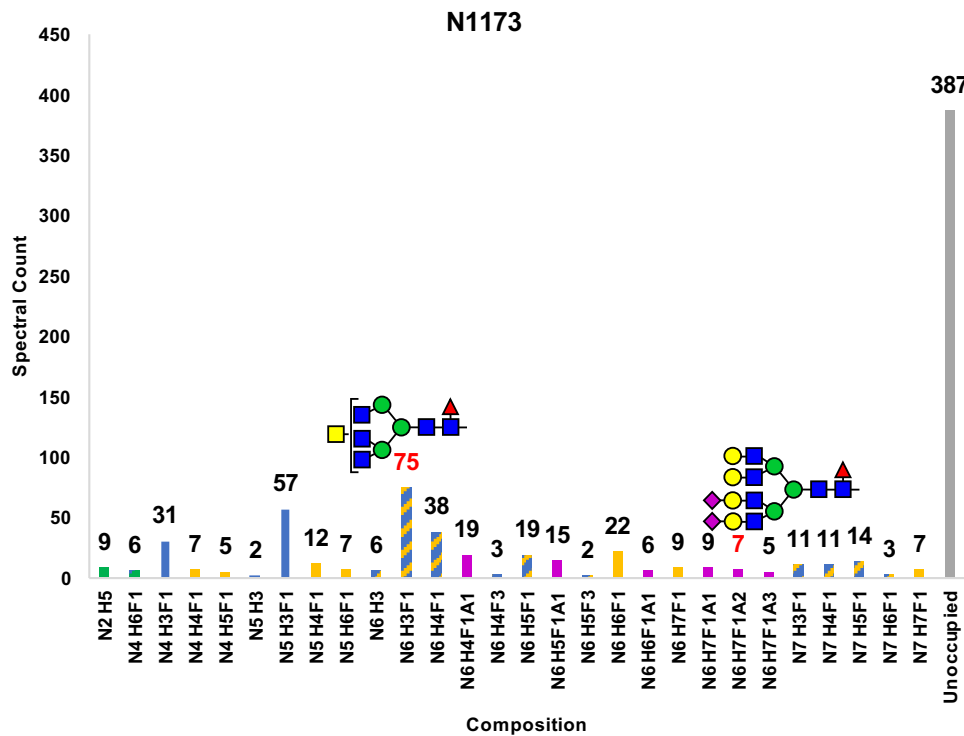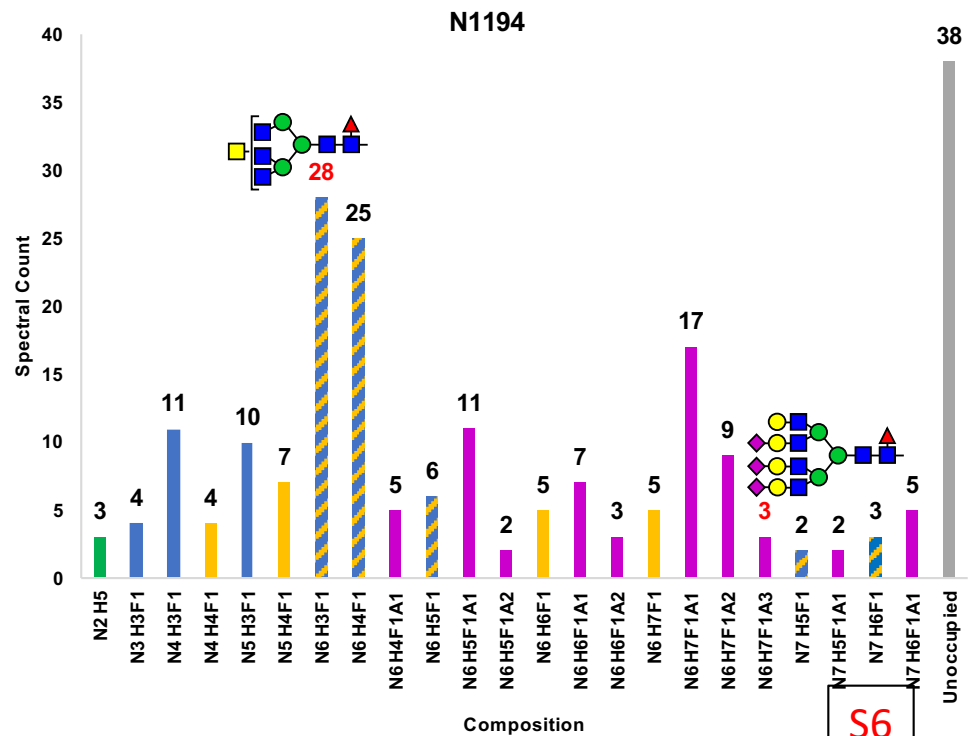

S6

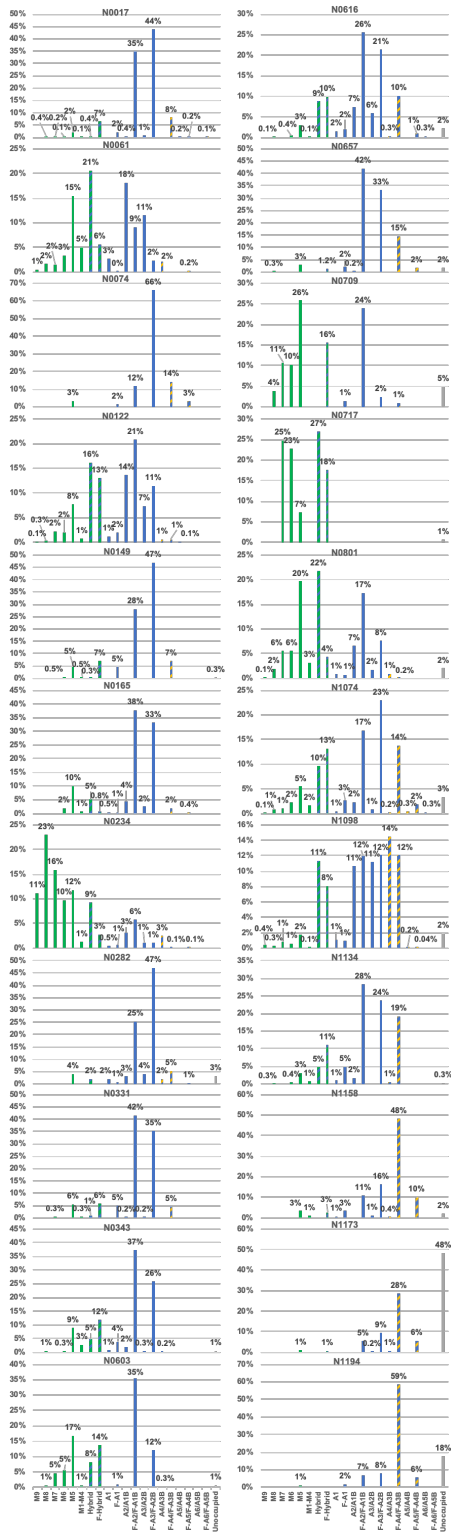

## Legends

**Pep+HexNAc1: precursor ions with reduced charge and/or neutral loss**

**HexNAc1: oxonium ions**

**b1: b- ions of peptide backbone (without additional glycans)**

**y1: y- ions of peptide backbone (without additional glycans)**

**z: charge state**

-  **Galactose (Gal)**
-  **Mannose (Man)**
-  ***N*-Acetylglucosamine (GlcNAc)**
-  **Fucose (Fuc)**
-  ***N*-Acetylneuraminic acid (Neu5Ac)**

  
VQPT\*ESIVR

Peptide (Pep):  
VQPTESIVR  
 $MH^{2+} = m/z\ 616.3323$   
 $\Delta M = 3.59\ \text{ppm}$

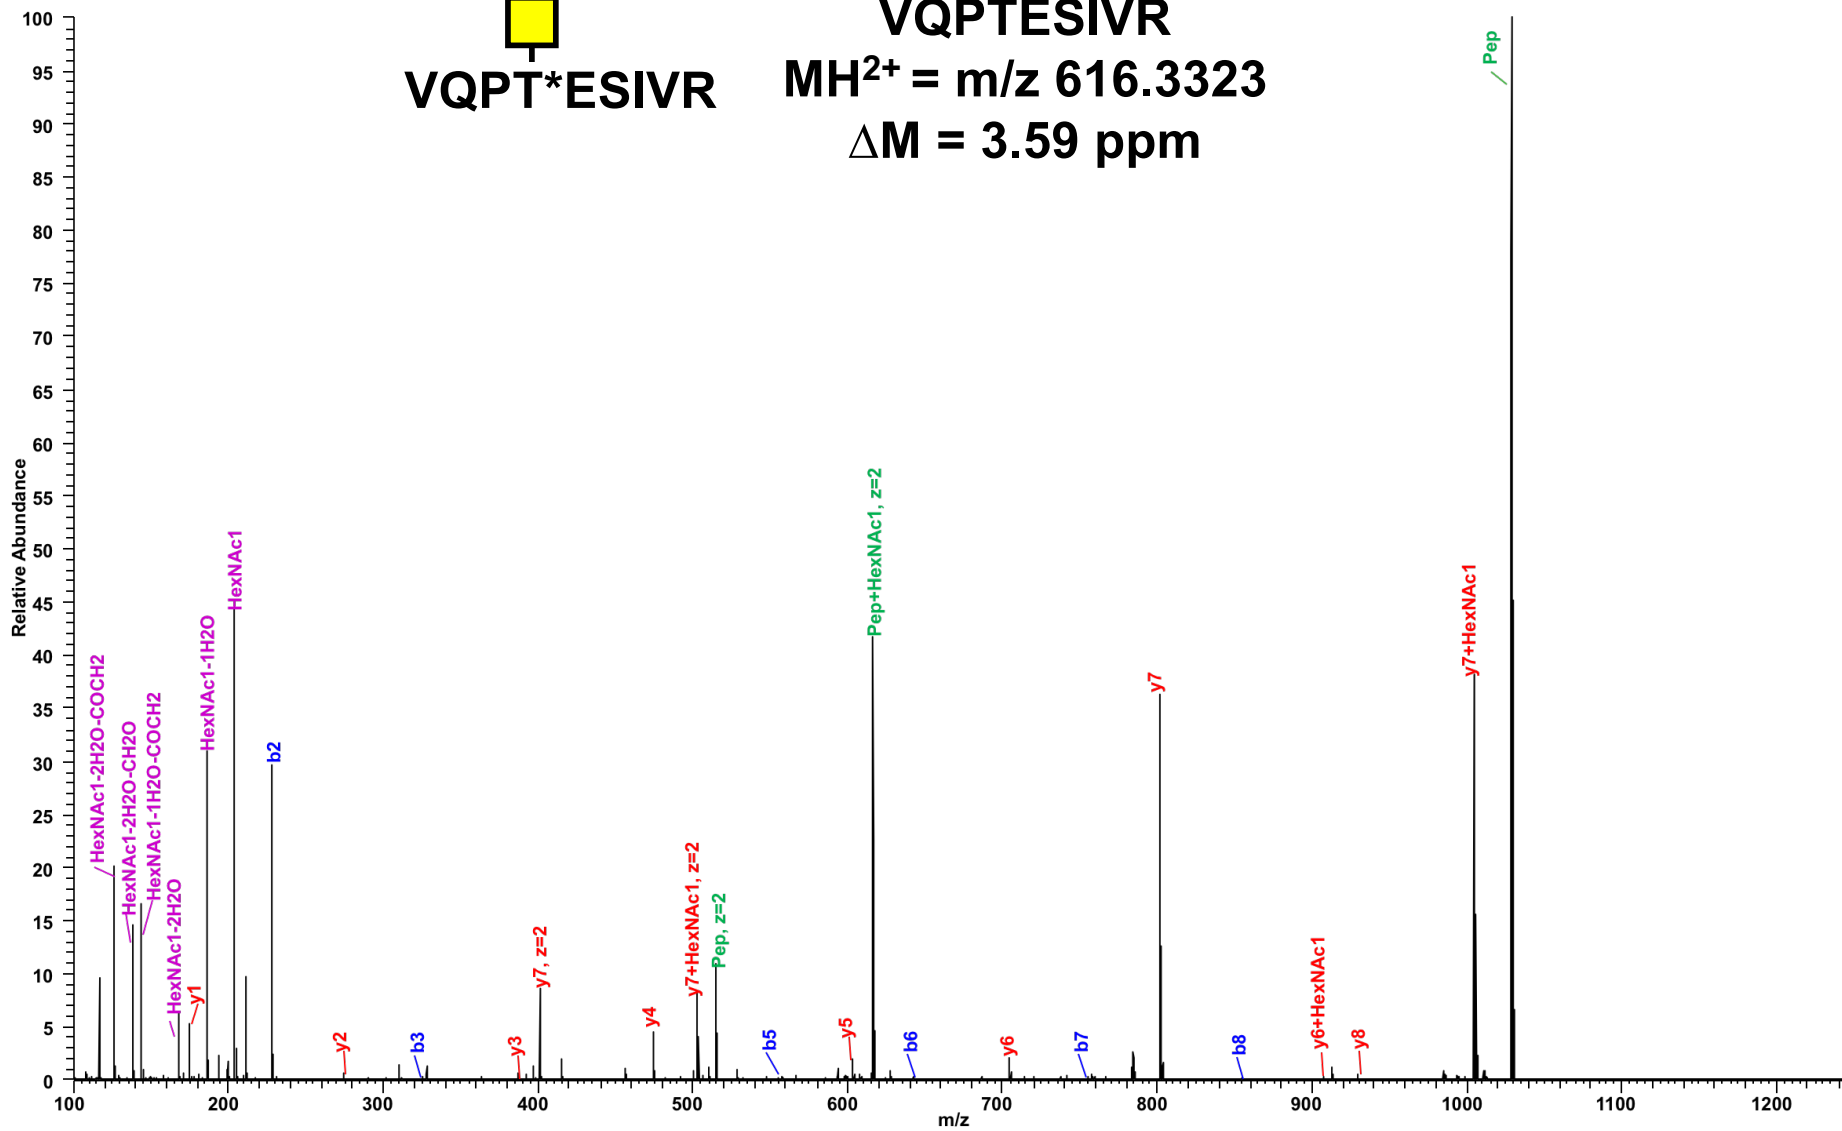

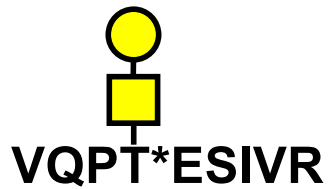

Peptide (Pep):  
**VQPTESIVR**  
 $MH^{2+} = m/z 697.3594$   
 $\Delta M = 4.16 \text{ ppm}$

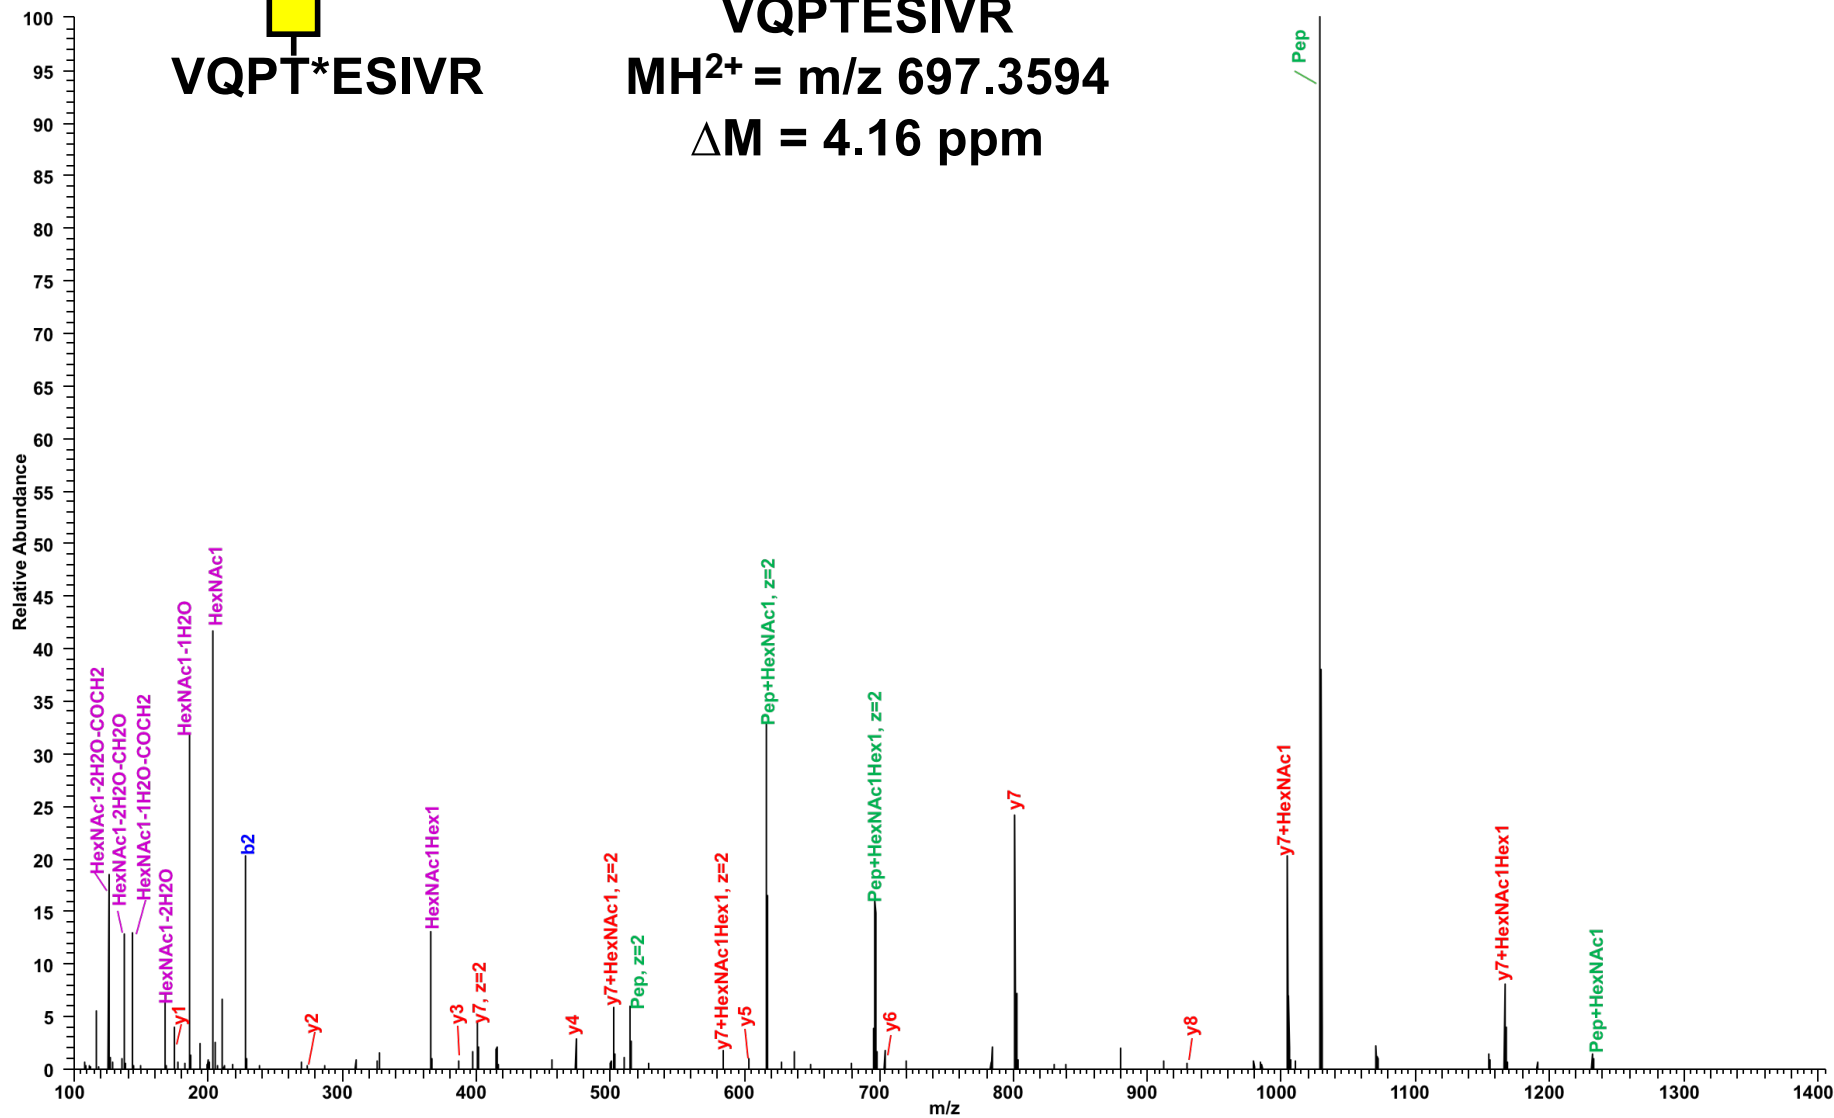



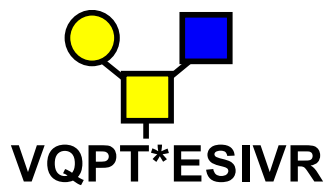

Peptide (Pep):  
 VQPTESIVR  
 $MH^{2+} = m/z\ 798.8979$   
 $\Delta M = 2.15\ \text{ppm}$

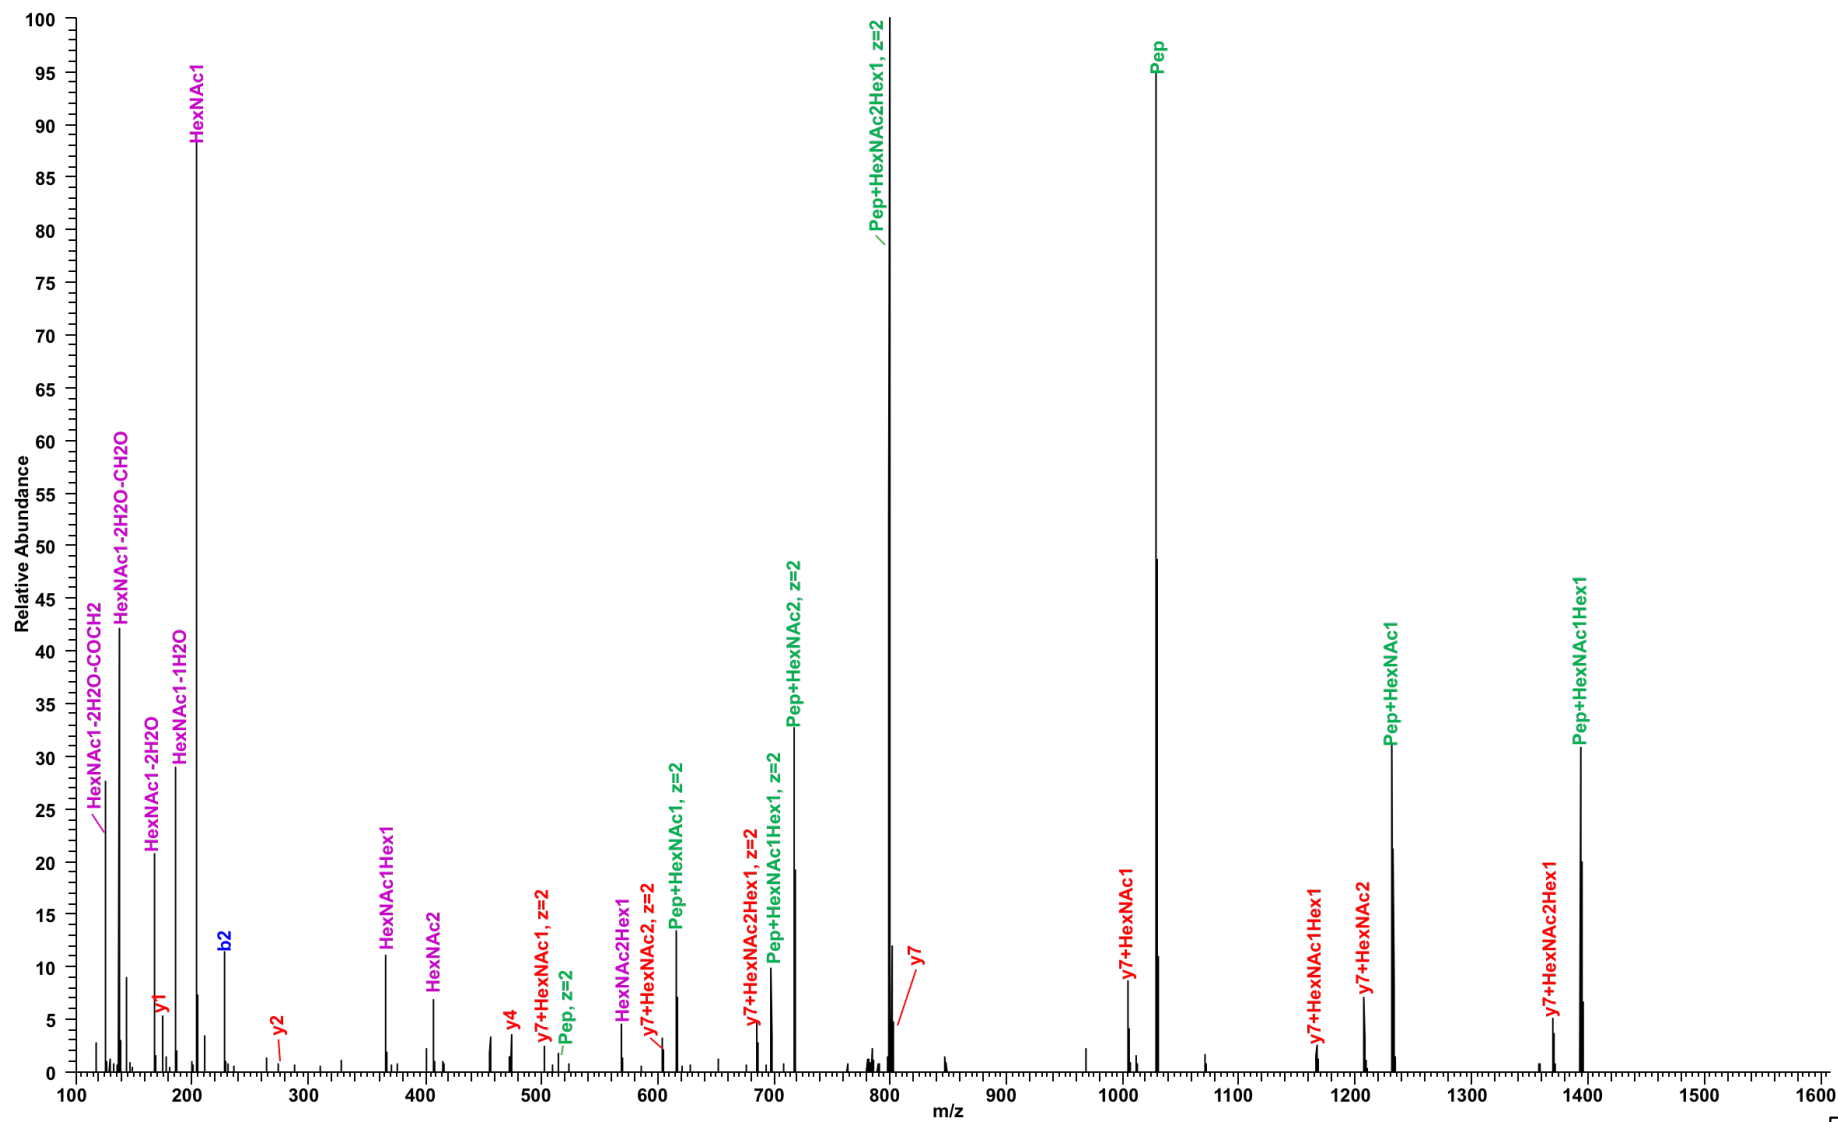

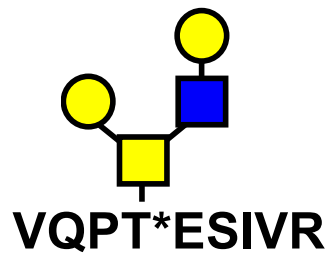

Peptide (Pep):  
**VQPTESIVR**  
 $MH^{2+} = m/z\ 879.9250$   
 $\Delta M = 2.73\ \text{ppm}$

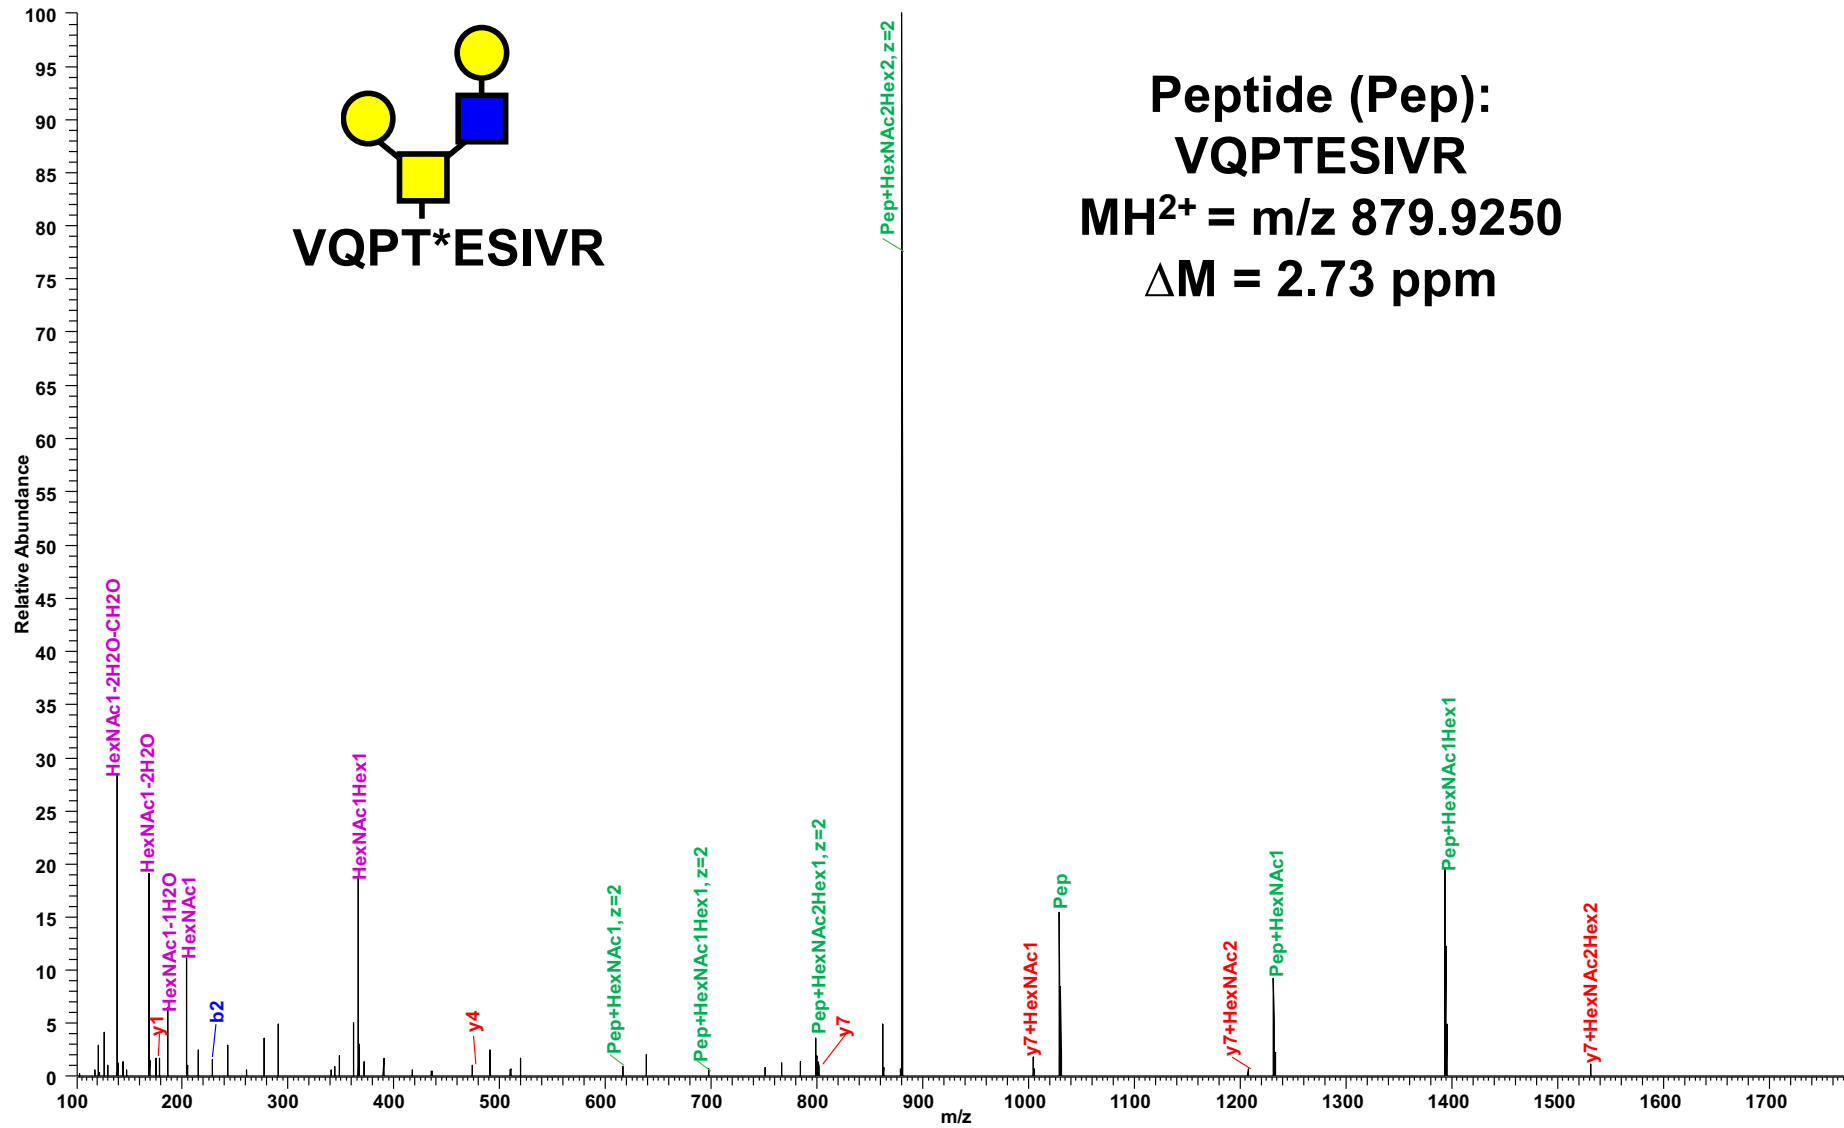

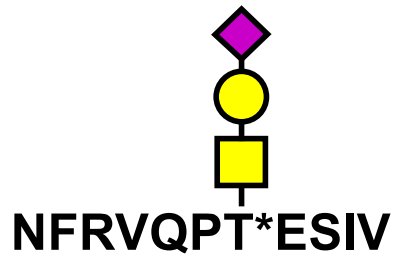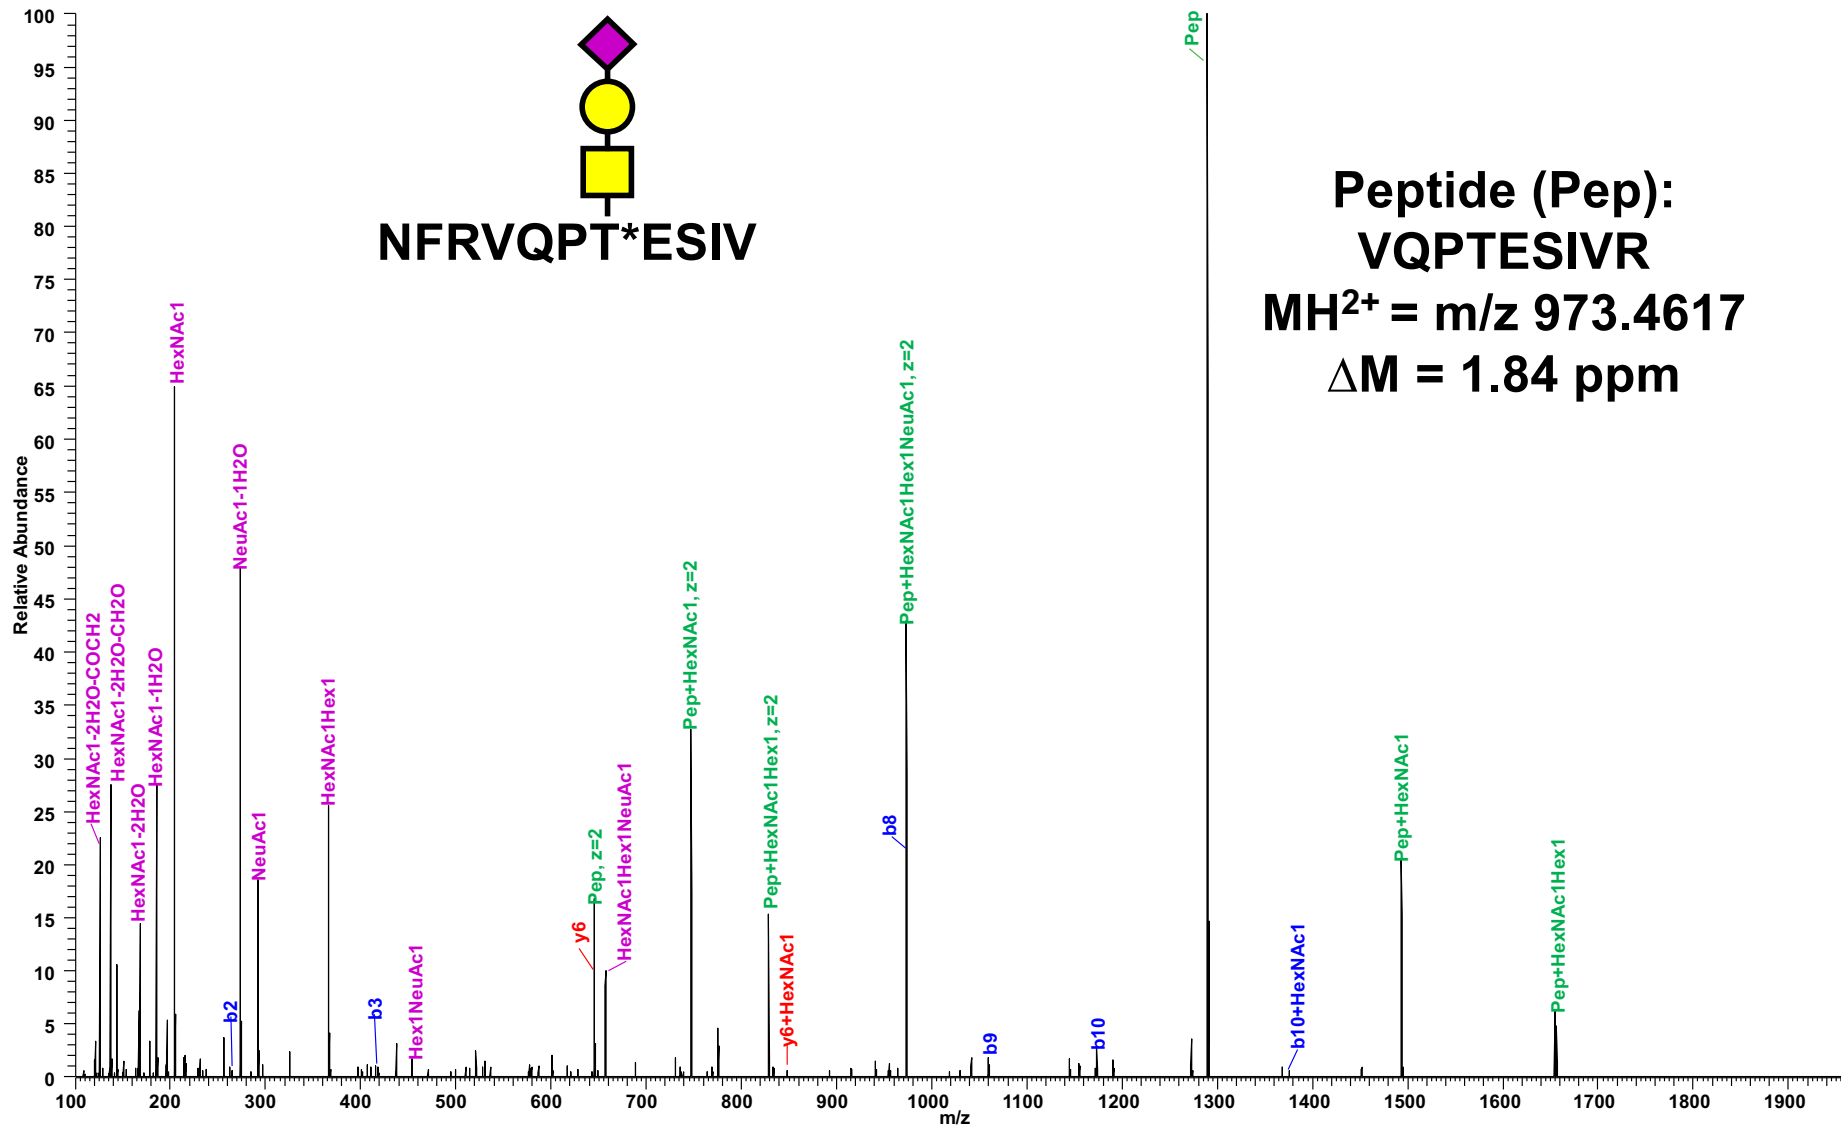

**Peptide (Pep):**  
**VQPTESIVR**  
**MH<sup>2+</sup> = m/z 973.4617**  
**ΔM = 1.84 ppm**

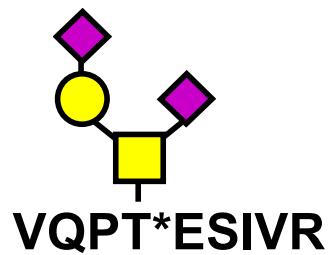

Peptide (Pep):  
**VQPTESIVR**  
 $MH^{2+} = m/z\ 988.4553$   
 $\Delta M = 3.43\ \text{ppm}$

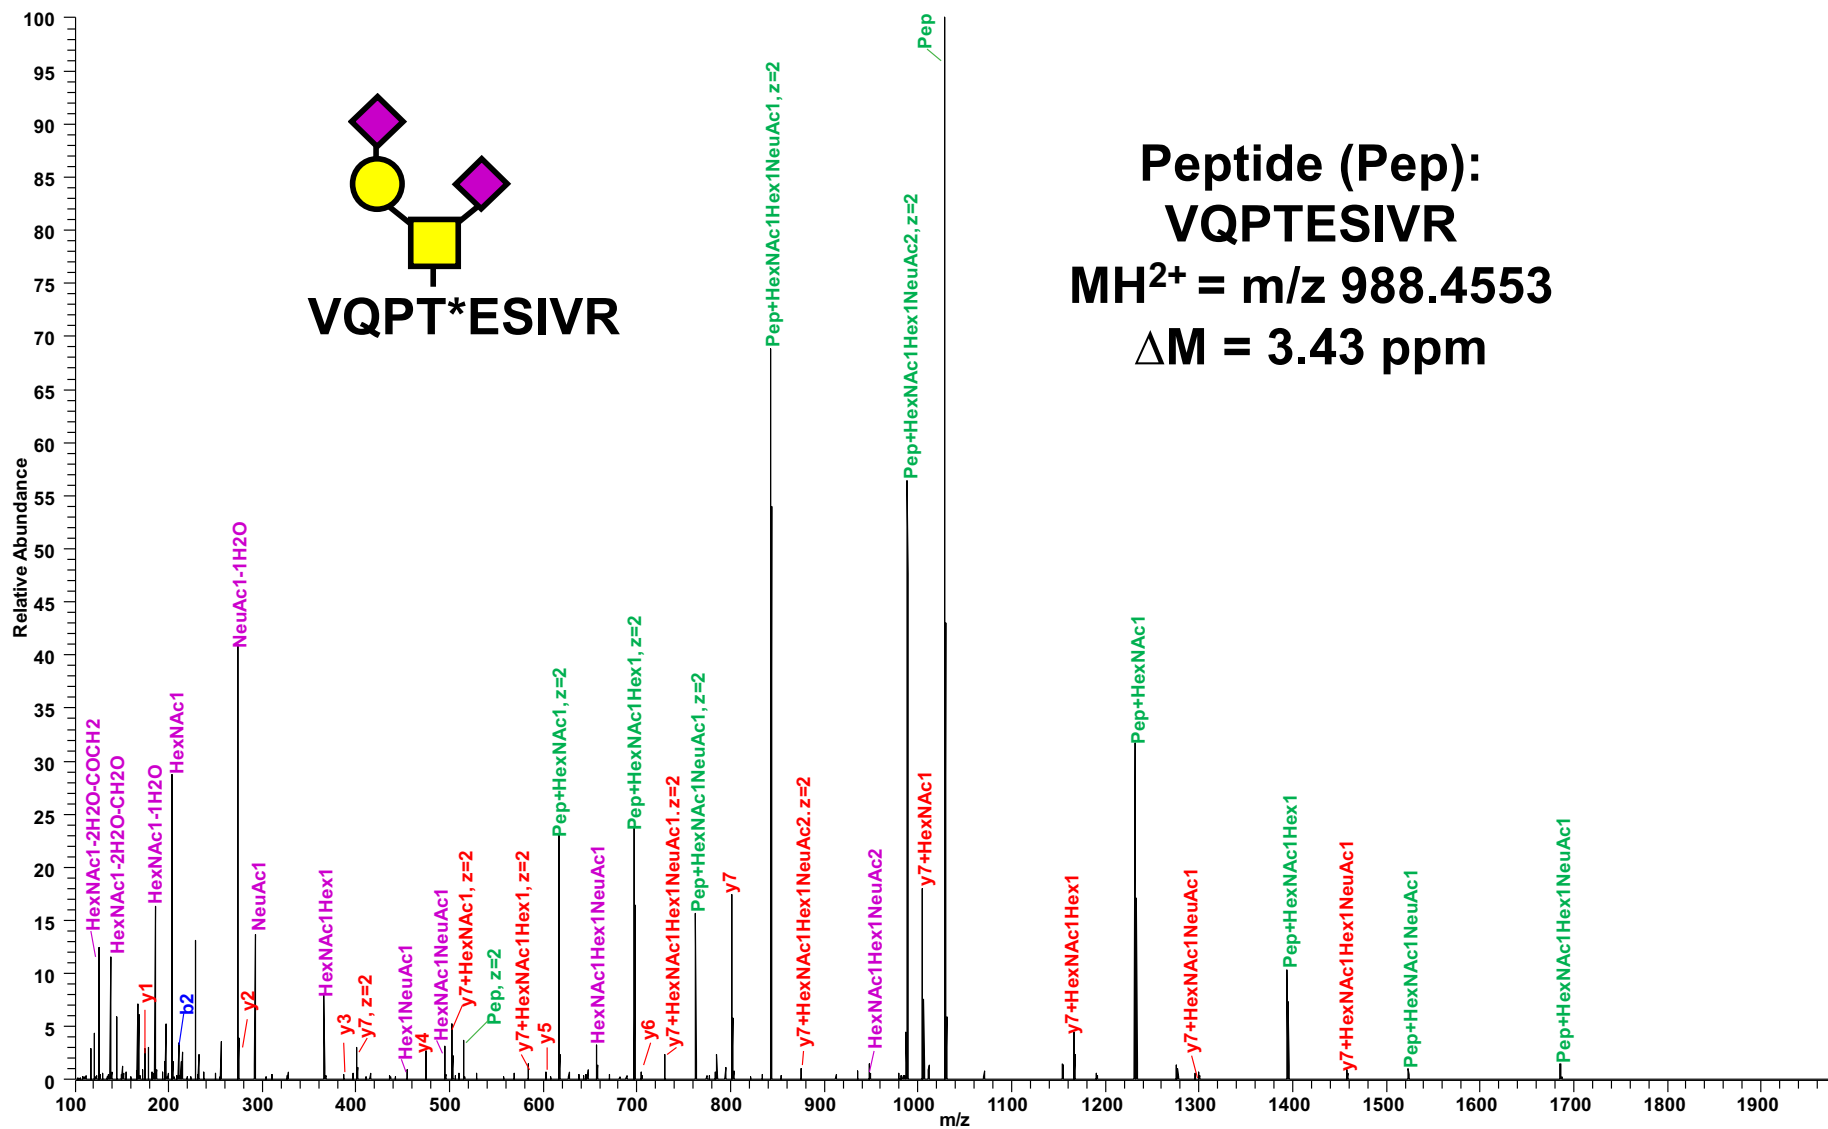



```

AAP13441.1 ... LTSGSDLRCTTFDDVQA--PNYTQHTSSMRGVVYPD ... FLPFYSNVTGFHTI-----NHT--FGNPVI ...
AGZ48831.1 ... LVSSYTIEKCLDFDDRT--PPANTQFLSSHRGVVYPD ... FLPFDSNVTRFITFGLN-----FDNPII ...
AVP78031.1 ... LVNS----QCVNLTGRTPLNPNYTN--SSQRGVVYPD ... FLPFYSNVSWYYSLTTNNA-ATKRTDNPIL ...
AVP78042.1 ... LVNS----QC-DLTGRTPLNPNYTN--SSQRGVVYPD ... FLPFYSNVSWYYSLTTNNA-ATKRTDNPIL ...
QIA48641.1 ... LVSS----QCVNLTTRTGIPPGYTN--SSTRGVVYPD ... FLPFFSNVTWFNTI--TYQGGSKKFDNPVL ...
QIA48614.1 ... LVSS----QCVNLTTRTGIPPGYTN--SSTRGVVYPD ... FLPFFSNVTWFNTI--NYQGGSKKFDNPVL ...
QIQ54048.1 ... LVSS----QCVNLTTRTGIPPGYTN--SSTRGVVYPD ... FLPFFSNVTWFNTIHLNYQGGSKKFDNPVL ...
QIA48623.1 ... LVSS----QCVNLTTRTGIPPGYTN--SSTRGVVYPD ... FLPFFSNVTWFNTI--NYQGGSKKFDNPVL ...
QIA48632.1 ... LVSS----QCVNLTTRTGIPPGYTN--SSTRGVVYPD ... FLPFFSNVTWFNTI--NYQGGSKKFDNPVL ...
YP_009724390.1 ... LVSS----QCVNLTTRTQLPPAYTN--SFTRGVVYPD ... FLPFFSNVTWFHAIHVSGTNGTKRFDNPVL ...
QHR63300.2 ... LVSS----QCVNLTTRTQLPPAYTN--SSTRGVVYPD ... FLPFFSNVTWFHAIHVSGTNGIKRFDNPVL ...
*... * : * * : * ***** **** ** : : : ** :

```

```

AAP13441.1 ... FGSTMNNKSQSVIIINNSTNVIRAC ... PFFAVSKPMGTQTHM---IFDNAFNCTFEYIS ...
AGZ48831.1 ... FGSTMNNKSQSVIIMNSTNLVIRAC ... PFF--VLKSNNTQ-IPSY-IFNNAFNCTFEYVS ...
AVP78031.1 ... FGTTLDNTSQSLLIVNNATNVIKVC ... PYLSGYYH-NKTWSIREFAVSSYANCTFEYVS ...
AVP78042.1 ... FGTTLDNTSQSLLIVNNATNVIKVC ... PYLSGYYH-NKTWSIREFAVSFYANCTFEYVS ...
QIA48641.1 ... FGTTLDARTQSLLIVNNATNVIKVC ... PFLGVYYHNNKTWENEFRVSSANNCTFEYIS ...
QIA48614.1 ... FGTTLDARTQSLLIVNNATNVIKVC ... PFLGVYYHNNKTWENEFRVSSANNCTFEYIS ...
QIQ54048.1 ... FGTTLDARTQSLLIVNNATNVIKVC ... PFLGVYYHNNKTWENEFRVSSANNCTFEYIS ...
QIA48623.1 ... FGTTLDARTQSLLIVNNATNVIKVC ... PFLGVYYHNNKTWENEFRVSSANNCTFEYIS ...
QIA48632.1 ... FGTTLDARTQSLLIVNNATNVIKVC ... PFLGVYYHNNKTWENEFRVSSANNCTFEYIS ...
YP_009724390.1 ... FGTTLDSKTQSLLIVNNATNVIKVC ... PFLGVYYHKNNKSWMESEFRVSSANNCTFEYVS ...
QHR63300.2 ... FGTTLDSKTQSLLIVNNATNVIKVC ... PFLGVYYHKNNKSWMESEFRVSSANNCTFEYVS ...
**:* : **:*:*:*:*:*:*:* * : : : **:*:*:*:*

```

```

AAP13441.1 ... FSLDVSEKSGNFKHLREFVF ... LPLGINITNFRAIL ...
AGZ48831.1 ... FNLDLGEKPGNFKDLREFVF ... LPLGINITNFRTLL ...
AVP78031.1 ... FMLNISGNGGLFNTLREFVF ... LPVSINITKFRTLL ...
AVP78042.1 ... FMLNISGNGGLFNTLREFVF ... LPVSINITKFRTLL ...
QIA48641.1 ... FLMDLEGKQGNFKNLREFVF ... LPIGINITRFQTL ...
QIA48614.1 ... FLMDLEGKQGNFKNLREFVF ... LPIGINITRFQTL ...
QIQ54048.1 ... FLMDLEGKQGNFKNLREFVF ... LPIGINITRFQTL ...
QIA48623.1 ... FLMDLEGKQGNFKNLREFVF ... LPIGINITRFQTL ...
QIA48632.1 ... FLMDLEGKQGNFKNLREFVF ... LPIGINITRFQTL ...
YP_009724390.1 ... FLMDLEGKQGNFKNLREFVF ... LPIGINITRFQTL ...
QHR63300.2 ... FLMDLEGKQGNFKNLREFVF ... LPIGINITRFQTL ...
* : : : * * : ***** **:*:*:*:*:*

```

SARS-CoV-2 S related sequences alignments.

SARS-CoV-1 as well as bat and pangolin coronavirus sequences reported to be closely related to SARS-CoV-2 were selected and downloaded from NCBI. The S protein sequences from all of these genomes were aligned and analyzed in the regions containing sites of N-glycosylation.

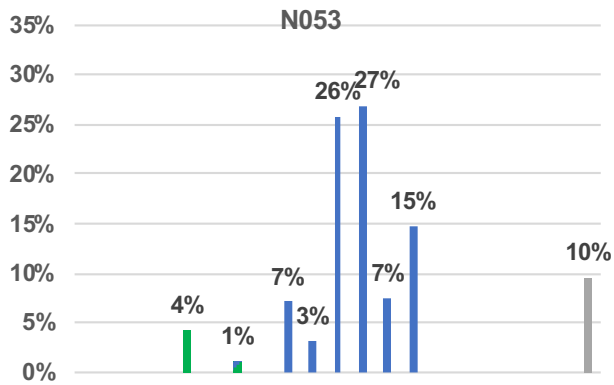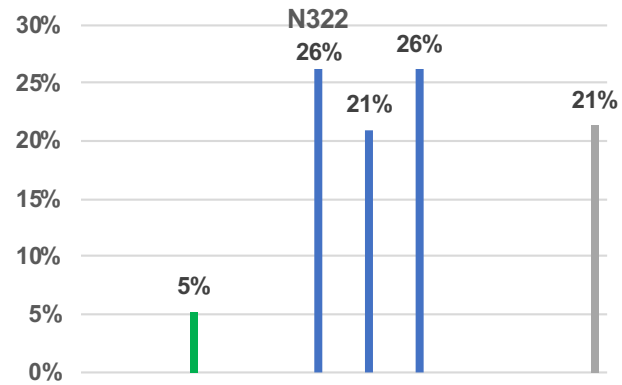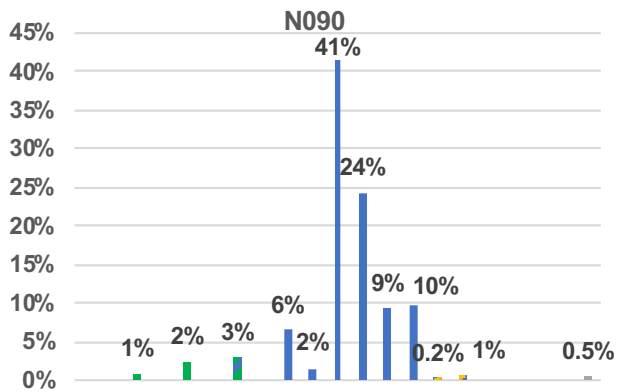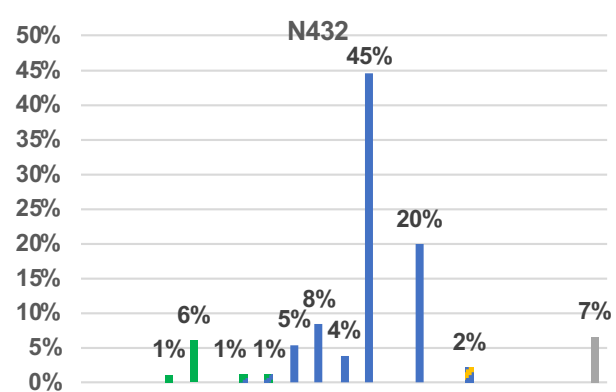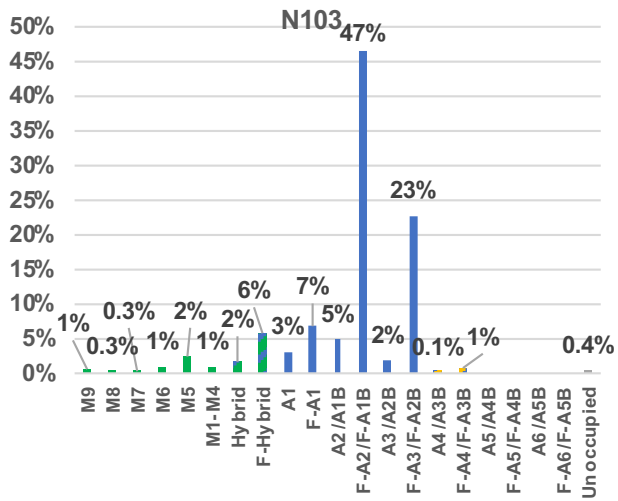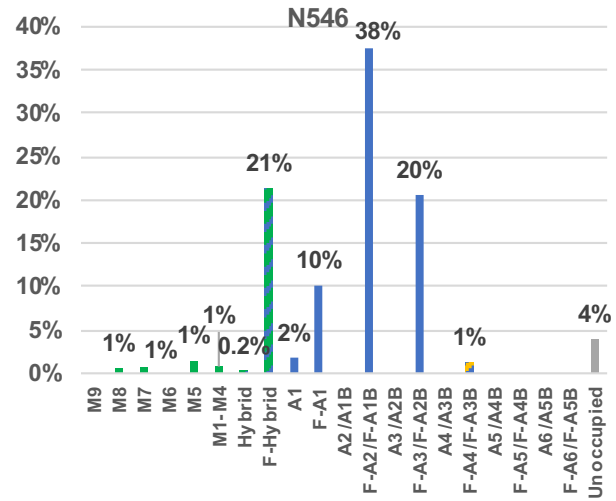

Supplement: Supplementary file [file media-1.pdf]
